# Supplementary material for: Copper-catalyzed radical cascade cyclization for the synthesis of phosphorated indolines
Source: Royal Society of Chemistry journal article supplement (doi:10.1039/c4cc10267c), 2015-01-01

## Supporting Information

# Copper-Catalyzed Radical Cascade Cyclization for the Synthesis of Phosphorated Indolines

Hong-Yu Zhang,<sup>a</sup> Liu-Liang Mao,<sup>a</sup> Bin Yang<sup>a</sup> and Shang-Dong Yang<sup>\*, a, b</sup>

<sup>a</sup>State Key Laboratory of Applied Organic Chemistry, Lanzhou University, Lanzhou 730000, P. R. China.

<sup>b</sup>State Key Laboratory for Oxo Synthesis and Selective Oxidation, Lanzhou Institute of Chemical Physics, Chinese Academy of Sciences, Lanzhou, 730000, P. R. China.

## Supporting Information

### Table of Contents

|                                                                                           |                 |
|-------------------------------------------------------------------------------------------|-----------------|
| <b>I. General Methods and Materials</b>                                                   | <b>S2</b>       |
| <b>II. Typical Procedures for the Synthesis of Substrates</b>                             | <b>S2-S3</b>    |
| <b>III. Detailed Reaction conditions Optimization</b>                                     | <b>S4-S7</b>    |
| <b>IV. General Procedures for Copper-Catalyzed Radical Cascade Cyclization of Alkenes</b> | <b>S7</b>       |
| <b>V. Radical Trapping Experiments</b>                                                    | <b>S7-S8</b>    |
| <b>VI. Control Experiments</b>                                                            | <b>S8</b>       |
| <b>VII. Plausible Mechanistic Pathway</b>                                                 | <b>S9</b>       |
| <b>VIII. Characterization of the Products</b>                                             | <b>S9-S17</b>   |
| <b>IX. References</b>                                                                     | <b>S17</b>      |
| <b>X. NMR Charts</b>                                                                      | <b>S18-S105</b> |

## I . General Methods and Materials

All reactions involving air- and moisture-sensitive reagents were carried out under an argon atmosphere.  $^1\text{H}$  and  $^{13}\text{C}$  NMR spectra were recorded on a Bruker advance III 400 spectrometer (400 MHz for  $^1\text{H}$  and 100 MHz for  $^{13}\text{C}$ ) in  $\text{CDCl}_3$  with TMS as internal standard. Chemical shifts ( $\delta$ ) were measured in ppm relative to TMS  $\delta = 0$  for  $^1\text{H}$ , or to chloroform  $\delta = 77.0$  for  $^{13}\text{C}$  as internal standard.  $^{31}\text{P}$  and  $^{19}\text{F}$  NMR spectra were recorded on the same instrument. Data are reported as follows: Chemical shift, multiplicity (s = singlet, d = doublet, t = triplet, q = quartet, m = multiplet), Coupling constants,  $J$ , are reported in hertz. Mass data were measured with Thermo Scientific DSQ II mass spectrometer. The starting materials were purchased from Aldrich, Acros Organics, J&K Chemicals or TCI and used without further purification. Solvents were dried and purified according to the procedure from "Purification of Laboratory Chemicals book". Thin-layer chromatography (TLC) was performed using 60 mesh silica gel plates visualized with short-wavelength UV light (254 nm). Substrates were prepared according to literature methods A<sup>1</sup> and methods B<sup>2,3</sup>.

## II . Typical Procedures for the Synthesis of Substrates

### Method A

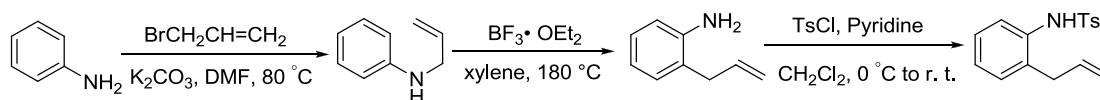

Typical procedure:

Allyl bromide (16.24 mmol) was added dropwise to a solution of commercially available aniline (16.24 mmol) and  $\text{K}_2\text{CO}_3$  (38.97 mmol) in DMF (37 mL). The solution was heated to  $80\text{ }^\circ\text{C}$  and stirred at this temperature overnight. The reaction mixture was then filtered, washed with  $\text{H}_2\text{O}$  (3x20 mL) and extracted with EtOAc (2x15 mL). The combined organic extracts were washed with brine (30 mL), dried over  $\text{Na}_2\text{SO}_4$  and concentrated in vacuo. The crude product was purified by column chromatography to afford *N*-allyl-aniline.

Next,  $\text{BF}_3 \cdot \text{OEt}_2$  (7.36 mmol) was added to a solution of *N*-allyl-aniline (7.36 mmol) in xylene (4 mL) at  $0\text{ }^\circ\text{C}$  under Ar atmosphere. The mixture was heated to  $180\text{ }^\circ\text{C}$  in a sealed tube and stirred at this temperature for 12 hours. After cooling, the reaction mixture was poured into 10% NaOH (10 mL), and extracted with EtOAc (3x15 mL). The combined organic extracts were washed with brine (10 mL), dried over  $\text{Na}_2\text{SO}_4$ , and concentrated in vacuo. The crude product was purified by

column chromatography to yield 2-allylaniline as a colorless oil.

Subsequently, 2-allylaniline (4.08 mmol) and pyridine (8.58 mmol, 2.1 equiv) in CH<sub>2</sub>Cl<sub>2</sub> (10 mL) was treated sequentially with tosyl chloride (4.49 mmol, 1.1 equiv) at 0 °C. The solution was allowed to warm to room temperature, and stirring was continued at this temperature overnight. Next, the reaction mixture was washed with a solution of 1 N HCl (20 mL) and extracted with EtOAc (3x20 mL). The combined organic extracts were washed with sat. aq. NaHCO<sub>3</sub> (20 mL) and then dried over Na<sub>2</sub>SO<sub>4</sub>. The solvents were removed in vacuo followed by flash chromatography to obtain the 2-allyl-*N*-tosylaniline as a white solid.

**Method B:**

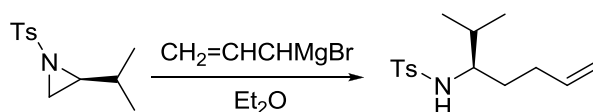

(*S*)-*N*-Tosyl-1-isopropyl-4-pentenyl amine:

Allylmagnesium bromide (1.0 M solution in diethyl ether, 10.5 mmol, 5 equiv) was added dropwise to (*S*)-2-isopropyl-*N*-tosylaziridine<sup>3</sup> (2.1 mmol, 1 equiv) dissolved in 5 mL Et<sub>2</sub>O under Ar(g). The mixture was stirred for an additional 16 h. The reaction was quenched with saturated NH<sub>4</sub>Cl(aq) (15 mL), and extracted with EtOAc (2 x10 mL). The crude oil was purified by flash chromatography to give (*S*)-*N*-tosyl-1-isopropyl-4-pentenyl amine as a white solid.

### III. Detailed Reaction Conditions Optimization

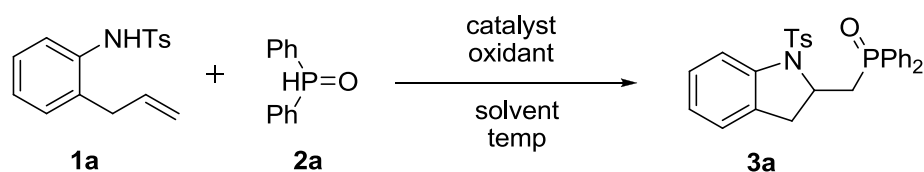

Table S1 Screening Different Catalysts<sup>a</sup>

| entry | Cat. (50 mol %)                                       | Oxidant (1.0 equiv) | T (°C) | Solvent            | Yield (%) <sup>b</sup> |
|-------|-------------------------------------------------------|---------------------|--------|--------------------|------------------------|
| 1     | Cu(ClO <sub>4</sub> ) <sub>2</sub> ·6H <sub>2</sub> O | AgNO <sub>3</sub>   | 80     | CH <sub>3</sub> CN | 16 %                   |
| 2     | Cu(OAc) <sub>2</sub>                                  | AgNO <sub>3</sub>   | 80     | CH <sub>3</sub> CN | Trace                  |
| 3     | Cu(OTf) <sub>2</sub>                                  | AgNO <sub>3</sub>   | 80     | CH <sub>3</sub> CN | Trace                  |
| 4     | CuBr <sub>2</sub>                                     | AgNO <sub>3</sub>   | 80     | CH <sub>3</sub> CN | N.R.                   |
| 5     | CuCl <sub>2</sub>                                     | AgNO <sub>3</sub>   | 80     | CH <sub>3</sub> CN | N.R.                   |
| 6     | CuO                                                   | AgNO <sub>3</sub>   | 80     | CH <sub>3</sub> CN | N.R.                   |
| 7     | Cu(NO <sub>3</sub> ) <sub>2</sub> ·3H <sub>2</sub> O  | AgNO <sub>3</sub>   | 80     | CH <sub>3</sub> CN | N.R.                   |
| 8     | Cu(EN) <sub>2</sub>                                   | AgNO <sub>3</sub>   | 80     | CH <sub>3</sub> CN | N.R.                   |
| 9     | CuF <sub>2</sub>                                      | AgNO <sub>3</sub>   | 80     | CH <sub>3</sub> CN | N.R.                   |
| 10    | Cu <sub>2</sub> (OH) <sub>2</sub> CO <sub>3</sub>     | AgNO <sub>3</sub>   | 80     | CH <sub>3</sub> CN | N.R.                   |
| 11    | Cu <sub>2</sub> O                                     | AgNO <sub>3</sub>   | 80     | CH <sub>3</sub> CN | N.R.                   |

[a] All reactions were carried out in the presence of 0.2 mmol of **1a** and 0.3 mmol of **2a** in 2.0 mL solvent under Ar atmosphere; N.R. = no reaction. [b] Yield of isolated product.

Table S2 Screening Different Ag Oxidant<sup>a</sup>

| entry | Cat. (50 mol %)                                       | Oxidant (1.0 equiv)             | T (°C) | Solvent            | Yield (%) <sup>b</sup> |
|-------|-------------------------------------------------------|---------------------------------|--------|--------------------|------------------------|
| 1     | Cu(ClO <sub>4</sub> ) <sub>2</sub> ·6H <sub>2</sub> O | Ag <sub>2</sub> O               | 80     | CH <sub>3</sub> CN | N.R.                   |
| 2     | Cu(ClO <sub>4</sub> ) <sub>2</sub> ·6H <sub>2</sub> O | Ag <sub>2</sub> CO <sub>3</sub> | 80     | CH <sub>3</sub> CN | Trace                  |
| 3     | Cu(ClO <sub>4</sub> ) <sub>2</sub> ·6H <sub>2</sub> O | AgOTf                           | 80     | CH <sub>3</sub> CN | 10 %                   |
| 4     | Cu(ClO <sub>4</sub> ) <sub>2</sub> ·6H <sub>2</sub> O | AgNO <sub>3</sub>               | 80     | CH <sub>3</sub> CN | 16 %                   |
| 5     | Cu(ClO <sub>4</sub> ) <sub>2</sub> ·6H <sub>2</sub> O | AgBF <sub>4</sub>               | 80     | CH <sub>3</sub> CN | N.R.                   |
| 6     | Cu(ClO <sub>4</sub> ) <sub>2</sub> ·6H <sub>2</sub> O | AgF                             | 80     | CH <sub>3</sub> CN | N.R.                   |
| 7     | Cu(ClO <sub>4</sub> ) <sub>2</sub> ·6H <sub>2</sub> O | AgTFA                           | 80     | CH <sub>3</sub> CN | N.R.                   |
| 8     | Cu(ClO <sub>4</sub> ) <sub>2</sub> ·6H <sub>2</sub> O | AgNO <sub>2</sub>               | 80     | CH <sub>3</sub> CN | N.R.                   |
| 9     | Cu(ClO <sub>4</sub> ) <sub>2</sub> ·6H <sub>2</sub> O | AgNTf <sub>2</sub>              | 80     | CH <sub>3</sub> CN | N.R.                   |
| 10    | Cu(ClO <sub>4</sub> ) <sub>2</sub> ·6H <sub>2</sub> O | Ag <sub>3</sub> PO <sub>4</sub> | 80     | CH <sub>3</sub> CN | 37%                    |

[a] All reactions were carried out in the presence of 0.2 mmol of **1a** and 0.3 mmol of **2a** in 2.0 mL solvent under Ar atmosphere; N.R. = no reaction. [b] Yield of isolated product.

Table S3 Screening the Loading of Cu(ClO<sub>4</sub>)<sub>2</sub>·6H<sub>2</sub>O<sup>a</sup>

| entry | Cu(ClO <sub>4</sub> ) <sub>2</sub> ·6H <sub>2</sub> O | Oxidant (1.0 equiv.)            | T (°C) | Solvent            | Yield (%) <sup>b</sup> |
|-------|-------------------------------------------------------|---------------------------------|--------|--------------------|------------------------|
| 1     | 25 %                                                  | Ag <sub>3</sub> PO <sub>4</sub> | 80     | CH <sub>3</sub> CN | Trace                  |
| 2     | 75 %                                                  | Ag <sub>3</sub> PO <sub>4</sub> | 80     | CH <sub>3</sub> CN | 41 %                   |
| 3     | 100 %                                                 | Ag <sub>3</sub> PO <sub>4</sub> | 80     | CH <sub>3</sub> CN | 48 %                   |

|   |       |                                 |    |                    |      |
|---|-------|---------------------------------|----|--------------------|------|
| 4 | 150 % | Ag <sub>3</sub> PO <sub>4</sub> | 80 | CH <sub>3</sub> CN | 57 % |
| 5 | 200 % | Ag <sub>3</sub> PO <sub>4</sub> | 80 | CH <sub>3</sub> CN | 65 % |
| 6 | 250 % | Ag <sub>3</sub> PO <sub>4</sub> | 80 | CH <sub>3</sub> CN | 62 % |
| 7 | 300 % | Ag <sub>3</sub> PO <sub>4</sub> | 80 | CH <sub>3</sub> CN | 46 % |

[a] All reactions were carried out in the presence of 0.2 mmol of **1a** and 0.3 mmol of **2a** in 2.0 mL solvent under Ar atmosphere; N.R. = no reaction. [b] Yield of isolated product.

Table S4 Screening Different Catalysts (200 mol %)<sup>a</sup>

| entry | Cat. (200 mol %)                                      | Oxidant (1.0 equiv)             | T (°C) | Solvent            | Yield (%) <sup>b</sup> |
|-------|-------------------------------------------------------|---------------------------------|--------|--------------------|------------------------|
| 1     | Cu(ClO <sub>4</sub> ) <sub>2</sub> ·6H <sub>2</sub> O | Ag <sub>3</sub> PO <sub>4</sub> | 80     | CH <sub>3</sub> CN | 65 %                   |
| 2     | Cu(OAc) <sub>2</sub>                                  | Ag <sub>3</sub> PO <sub>4</sub> | 80     | CH <sub>3</sub> CN | Trace                  |
| 3     | Cu(OTf) <sub>2</sub>                                  | Ag <sub>3</sub> PO <sub>4</sub> | 80     | CH <sub>3</sub> CN | 60 %                   |
| 4     | CuBr <sub>2</sub>                                     | Ag <sub>3</sub> PO <sub>4</sub> | 80     | CH <sub>3</sub> CN | N.R.                   |
| 5     | CuCl <sub>2</sub>                                     | Ag <sub>3</sub> PO <sub>4</sub> | 80     | CH <sub>3</sub> CN | N.R.                   |
| 6     | CuO                                                   | Ag <sub>3</sub> PO <sub>4</sub> | 80     | CH <sub>3</sub> CN | 20 %                   |
| 7     | Cu(NO <sub>3</sub> ) <sub>2</sub> ·3H <sub>2</sub> O  | Ag <sub>3</sub> PO <sub>4</sub> | 80     | CH <sub>3</sub> CN | N.R.                   |
| 8     | Cu(EN) <sub>2</sub>                                   | Ag <sub>3</sub> PO <sub>4</sub> | 80     | CH <sub>3</sub> CN | Trace                  |
| 9     | CuF <sub>2</sub>                                      | Ag <sub>3</sub> PO <sub>4</sub> | 80     | CH <sub>3</sub> CN | N.R.                   |
| 10    | Cu <sub>2</sub> (OH) <sub>2</sub> CO <sub>3</sub>     | Ag <sub>3</sub> PO <sub>4</sub> | 80     | CH <sub>3</sub> CN | N.R.                   |
| 11    | Cu <sub>2</sub> O                                     | Ag <sub>3</sub> PO <sub>4</sub> | 80     | CH <sub>3</sub> CN | 10 %                   |
| 12    | Cu(CH <sub>3</sub> CN) <sub>4</sub> PF <sub>6</sub>   | Ag <sub>3</sub> PO <sub>4</sub> | 80     | CH <sub>3</sub> CN | 13 %                   |
| 13    | CuI                                                   | Ag <sub>3</sub> PO <sub>4</sub> | 80     | CH <sub>3</sub> CN | N.R.                   |
| 14    | CuBr                                                  | Ag <sub>3</sub> PO <sub>4</sub> | 80     | CH <sub>3</sub> CN | Trace                  |
| 15    | CuCl                                                  | Ag <sub>3</sub> PO <sub>4</sub> | 80     | CH <sub>3</sub> CN | N.R.                   |
| 16    | No                                                    | Ag <sub>3</sub> PO <sub>4</sub> | 80     | CH <sub>3</sub> CN | N.R.                   |

[a] All reactions were carried out in the presence of 0.2 mmol of **1a** and 0.3 mmol of **2a** in 2.0 mL solvent under Ar atmosphere; N.R. = no reaction. [b] Yield of isolated product.

Table S5 Screening Different Temperature<sup>a</sup>

| entry | Cat. (200 mol %)                                      | Oxidant (1.0 equiv)             | T (°C) | Solvent            | Yield (%) <sup>b</sup> |
|-------|-------------------------------------------------------|---------------------------------|--------|--------------------|------------------------|
| 1     | Cu(ClO <sub>4</sub> ) <sub>2</sub> ·6H <sub>2</sub> O | Ag <sub>3</sub> PO <sub>4</sub> | 95     | CH <sub>3</sub> CN | 66 %                   |
| 2     | Cu(ClO <sub>4</sub> ) <sub>2</sub> ·6H <sub>2</sub> O | Ag <sub>3</sub> PO <sub>4</sub> | 80     | CH <sub>3</sub> CN | 65 %                   |
| 3     | Cu(ClO <sub>4</sub> ) <sub>2</sub> ·6H <sub>2</sub> O | Ag <sub>3</sub> PO <sub>4</sub> | 65     | CH <sub>3</sub> CN | 68 %                   |
| 4     | Cu(ClO <sub>4</sub> ) <sub>2</sub> ·6H <sub>2</sub> O | Ag <sub>3</sub> PO <sub>4</sub> | 50     | CH <sub>3</sub> CN | 63 %                   |
| 5     | Cu(ClO <sub>4</sub> ) <sub>2</sub> ·6H <sub>2</sub> O | Ag <sub>3</sub> PO <sub>4</sub> | 35     | CH <sub>3</sub> CN | 60 %                   |

[a] All reactions were carried out in the presence of 0.2 mmol of **1a** and 0.3 mmol of **2a** in 2.0 mL solvent under Ar atmosphere; N.R. = no reaction. [b] Yield of isolated product.

Table S6 Screening Different Solvent<sup>a</sup>

| entry | Cat. (200 mol %)                                      | Oxidant (1.0 equiv)             | T (°C) | Solvent                              | Yield (%) <sup>b</sup> |
|-------|-------------------------------------------------------|---------------------------------|--------|--------------------------------------|------------------------|
| 1     | Cu(ClO <sub>4</sub> ) <sub>2</sub> ·6H <sub>2</sub> O | Ag <sub>3</sub> PO <sub>4</sub> | 65     | ClCH <sub>2</sub> CH <sub>2</sub> Cl | Trace                  |
| 2     | Cu(ClO <sub>4</sub> ) <sub>2</sub> ·6H <sub>2</sub> O | Ag <sub>3</sub> PO <sub>4</sub> | 65     | CHCl <sub>3</sub>                    | Trace                  |
| 3     | Cu(ClO <sub>4</sub> ) <sub>2</sub> ·6H <sub>2</sub> O | Ag <sub>3</sub> PO <sub>4</sub> | 65     | CH <sub>2</sub> Cl <sub>2</sub>      | Trace                  |

|    |                                                       |                                 |    |             |       |
|----|-------------------------------------------------------|---------------------------------|----|-------------|-------|
| 4  | Cu(ClO <sub>4</sub> ) <sub>2</sub> ·6H <sub>2</sub> O | Ag <sub>3</sub> PO <sub>4</sub> | 65 | toluene     | trace |
| 5  | Cu(ClO <sub>4</sub> ) <sub>2</sub> ·6H <sub>2</sub> O | Ag <sub>3</sub> PO <sub>4</sub> | 65 | THF         | N.R.  |
| 6  | Cu(ClO <sub>4</sub> ) <sub>2</sub> ·6H <sub>2</sub> O | Ag <sub>3</sub> PO <sub>4</sub> | 65 | DME         | N.R.  |
| 7  | Cu(ClO <sub>4</sub> ) <sub>2</sub> ·6H <sub>2</sub> O | Ag <sub>3</sub> PO <sub>4</sub> | 65 | 1,4-dioxane | N.R.  |
| 8  | Cu(ClO <sub>4</sub> ) <sub>2</sub> ·6H <sub>2</sub> O | Ag <sub>3</sub> PO <sub>4</sub> | 65 | DMF         | N.R.  |
| 9  | Cu(ClO <sub>4</sub> ) <sub>2</sub> ·6H <sub>2</sub> O | Ag <sub>3</sub> PO <sub>4</sub> | 65 | DMA         | N.R.  |
| 10 | Cu(ClO <sub>4</sub> ) <sub>2</sub> ·6H <sub>2</sub> O | Ag <sub>3</sub> PO <sub>4</sub> | 65 | DMSO        | N.R.  |

[a] All reactions were carried out in the presence of 0.2 mmol of **1a** and 0.3 mmol of **2a** in 2.0 mL different solvent under Ar atmosphere; N.R. = no reaction. [b] Yield of isolated product.

Table S7 Screening Different Oxidant<sup>a</sup>

| entry | Cat. (200 mol %)                                      | Oxidant (1.0 equiv)                                           | T (°C) | Solvent            | Yield (%) <sup>b</sup> |
|-------|-------------------------------------------------------|---------------------------------------------------------------|--------|--------------------|------------------------|
| 1     | Cu(ClO <sub>4</sub> ) <sub>2</sub> ·6H <sub>2</sub> O | K <sub>2</sub> S <sub>2</sub> O <sub>8</sub>                  | 65     | CH <sub>3</sub> CN | 48 %                   |
| 2     | Cu(ClO <sub>4</sub> ) <sub>2</sub> ·6H <sub>2</sub> O | Na <sub>2</sub> S <sub>2</sub> O <sub>8</sub>                 | 65     | CH <sub>3</sub> CN | 41 %                   |
| 3     | Cu(ClO <sub>4</sub> ) <sub>2</sub> ·6H <sub>2</sub> O | <sup>t</sup> BuOOH                                            | 65     | CH <sub>3</sub> CN | 43 %                   |
| 4     | Cu(ClO <sub>4</sub> ) <sub>2</sub> ·6H <sub>2</sub> O | <sup>t</sup> BuOO <sup>t</sup> Bu                             | 65     | CH <sub>3</sub> CN | 35 %                   |
| 5     | Cu(ClO <sub>4</sub> ) <sub>2</sub> ·6H <sub>2</sub> O | (NH <sub>4</sub> ) <sub>2</sub> S <sub>2</sub> O <sub>8</sub> | 65     | CH <sub>3</sub> CN | 36 %                   |
| 6     | Cu(ClO <sub>4</sub> ) <sub>2</sub> ·6H <sub>2</sub> O | Dicumyl peroxide                                              | 65     | CH <sub>3</sub> CN | trace                  |
| 7     | Cu(ClO <sub>4</sub> ) <sub>2</sub> ·6H <sub>2</sub> O | Dibenzoyl peroxide                                            | 65     | CH <sub>3</sub> CN | trace                  |
| 8     | Cu(ClO <sub>4</sub> ) <sub>2</sub> ·6H <sub>2</sub> O | DDQ                                                           | 65     | CH <sub>3</sub> CN | N.R.                   |
| 9     | Cu(ClO <sub>4</sub> ) <sub>2</sub> ·6H <sub>2</sub> O | BQ                                                            | 65     | CH <sub>3</sub> CN | N.R.                   |
| 10    | Cu(ClO <sub>4</sub> ) <sub>2</sub> ·6H <sub>2</sub> O | PhI(OAc) <sub>2</sub>                                         | 65     | CH <sub>3</sub> CN | N.R.                   |
| 11    | Cu(ClO <sub>4</sub> ) <sub>2</sub> ·6H <sub>2</sub> O | MnO <sub>2</sub>                                              | 65     | CH <sub>3</sub> CN | N.R.                   |

[a] All reactions were carried out in the presence of 0.2 mmol of **1a** and 0.3 mmol of **2a** in 2.0 mL solvent under Ar atmosphere; N.R. = no reaction. [b] Yield of isolated product.

Table S8 Screening the Loading of **2a** and K<sub>2</sub>S<sub>2</sub>O<sub>8</sub><sup>a</sup>

| entry | Cat. (200 mol %)                                      | <b>2a</b> | K <sub>2</sub> S <sub>2</sub> O <sub>8</sub> | T (°C) | Solvent            | Yield (%) <sup>b</sup> |
|-------|-------------------------------------------------------|-----------|----------------------------------------------|--------|--------------------|------------------------|
| 1     | Cu(ClO <sub>4</sub> ) <sub>2</sub> ·6H <sub>2</sub> O | 2.0 equiv | 1.5 equiv                                    | 65     | CH <sub>3</sub> CN | 36 %                   |
| 2     | Cu(ClO <sub>4</sub> ) <sub>2</sub> ·6H <sub>2</sub> O | 2.0 equiv | 2.0 equiv                                    | 65     | CH <sub>3</sub> CN | 34 %                   |
| 3     | Cu(ClO <sub>4</sub> ) <sub>2</sub> ·6H <sub>2</sub> O | 2.0 equiv | 2.5 equiv                                    | 65     | CH <sub>3</sub> CN | 17 %                   |
| 4     | Cu(ClO <sub>4</sub> ) <sub>2</sub> ·6H <sub>2</sub> O | 2.0 equiv | 3.0 equiv                                    | 65     | CH <sub>3</sub> CN | trace                  |
| 5     | Cu(ClO <sub>4</sub> ) <sub>2</sub> ·6H <sub>2</sub> O | 3.0 equiv | 1.5 equiv                                    | 65     | CH <sub>3</sub> CN | 52 %                   |
| 6     | Cu(ClO <sub>4</sub> ) <sub>2</sub> ·6H <sub>2</sub> O | 3.0 equiv | 2.0 equiv                                    | 65     | CH <sub>3</sub> CN | 52 %                   |
| 7     | Cu(ClO <sub>4</sub> ) <sub>2</sub> ·6H <sub>2</sub> O | 3.0 equiv | 2.5 equiv                                    | 65     | CH <sub>3</sub> CN | 41 %                   |
| 8     | Cu(ClO <sub>4</sub> ) <sub>2</sub> ·6H <sub>2</sub> O | 3.0 equiv | 3.0 equiv                                    | 65     | CH <sub>3</sub> CN | 32 %                   |
| 9     | Cu(ClO <sub>4</sub> ) <sub>2</sub> ·6H <sub>2</sub> O | 4.0 equiv | 1.5 equiv                                    | 65     | CH <sub>3</sub> CN | 57 %                   |
| 10    | Cu(ClO <sub>4</sub> ) <sub>2</sub> ·6H <sub>2</sub> O | 4.0 equiv | 2.0 equiv                                    | 65     | CH <sub>3</sub> CN | 60 %                   |
| 11    | Cu(ClO <sub>4</sub> ) <sub>2</sub> ·6H <sub>2</sub> O | 4.0 equiv | 2.5 equiv                                    | 65     | CH <sub>3</sub> CN | 64 %                   |
| 12    | Cu(ClO <sub>4</sub> ) <sub>2</sub> ·6H <sub>2</sub> O | 4.0 equiv | 3.0 equiv                                    | 65     | CH <sub>3</sub> CN | 73 %                   |

[a] All reactions were carried out in the presence of 0.2 mmol of **1a** in 2.0 mL solvent under Ar atmosphere; N.R. = no reaction. [b] Yield of isolated product.

Table S9 Screening for Reaction Conditions<sup>a</sup>

| entry | Cu(ClO <sub>4</sub> ) <sub>2</sub> ·6H <sub>2</sub> O | Time    | K <sub>2</sub> S <sub>2</sub> O <sub>8</sub> | T (°C) | Solvent            | Yield (%) <sup>b</sup> |
|-------|-------------------------------------------------------|---------|----------------------------------------------|--------|--------------------|------------------------|
| 1     | 20 %                                                  | 3 hour  | 3.0 equiv.                                   | 65     | CH <sub>3</sub> CN | 35 %                   |
| 2     | 20 %                                                  | 6 hour  | 3.0 equiv.                                   | 65     | CH <sub>3</sub> CN | 58 %                   |
| 3     | 20 %                                                  | 10 hour | 3.0 equiv.                                   | 65     | CH <sub>3</sub> CN | 40 %                   |
| 4     | 20 %                                                  | 6 hour  | 3.0 equiv.                                   | 50     | CH <sub>3</sub> CN | 62 %                   |
| 5     | 20 %                                                  | 6 hour  | 3.0 equiv.                                   | 35     | CH <sub>3</sub> CN | 74 %                   |
| 6     | 25 %                                                  | 6 hour  | 3.0 equiv.                                   | 35     | CH <sub>3</sub> CN | 74 %                   |
| 7     | 15 %                                                  | 6 hour  | 3.0 equiv.                                   | 35     | CH <sub>3</sub> CN | 60 %                   |

[a] **2a** (0.8 mmol) in solvent (2 mL) was added dropwise *via* an automatic syringe to a mixture of **1a** (0.2 mmol), Cu(ClO<sub>4</sub>)<sub>2</sub>·6H<sub>2</sub>O, K<sub>2</sub>S<sub>2</sub>O<sub>8</sub> (0.6 mmol) in solvent (2 mL). [b] Yield of isolated product.

#### IV. General Procedures for Copper-Catalyzed Radical Cascade Cyclization of Alkenes:

To a Schlenk tube were added **1a** (0.2 mmol), Cu(ClO<sub>4</sub>)<sub>2</sub>·6H<sub>2</sub>O (0.04 mmol), K<sub>2</sub>S<sub>2</sub>O<sub>8</sub> (0.6 mmol) and charged with argon for three times. Anhydrous CH<sub>3</sub>CN (2.0 mL) was added *via* syringe and the mixture was stirred at 35 °C under Ar for 5 min. Then **2a** (0.8 mmol) in CH<sub>3</sub>CN (2 mL) was added dropwise *via* an automatic syringe to the mixture in 6 hour at 35 °C under Ar atmosphere. The substrate was consumed (monitored by TLC) after the mixture was stirred for an additional hour, and then the reaction was cooled to room temperature. The solvent was removed by rotary and the resulting residue was purified by column chromatography on silica gel (eluent: hexanes/ethylacetate = 4:3) to afford the product **3a** in 74 % yield.

#### V. Radical Trapping Experiments:

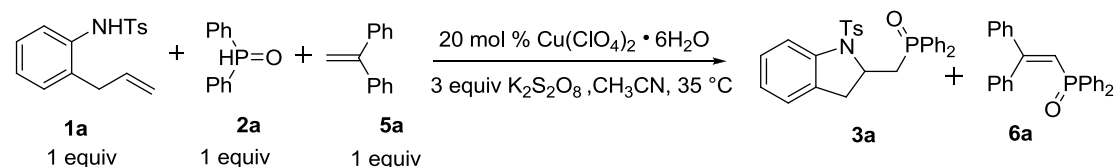

To a Schlenk tube were added **1a** (0.2 mmol), Cu(ClO<sub>4</sub>)<sub>2</sub>·6H<sub>2</sub>O (0.04 mmol), K<sub>2</sub>S<sub>2</sub>O<sub>8</sub> (0.6 mmol), **5a** (0.2 mmol) and charged with argon for three times. Anhydrous CH<sub>3</sub>CN (2.0 mL) was added *via* syringe and the mixture was stirred at 35 °C under Ar for 5 min. Then **2a** (0.2 mmol) in CH<sub>3</sub>CN (2 mL) was added dropwise *via* an automatic syringe to the mixture in 6 hour at 35 °C under Ar atmosphere. The substrate was consumed (monitored by TLC) after the mixture was stirred for an additional hour, and then the reaction was cooled to room temperature. The solvent was removed by rotary and the resulting residue was purified by column chromatography on silica gel (eluent: hexanes/ethylacetate = 2:1) to afford the product **3a** in 4 % yield and **6a** in 30 % yield.

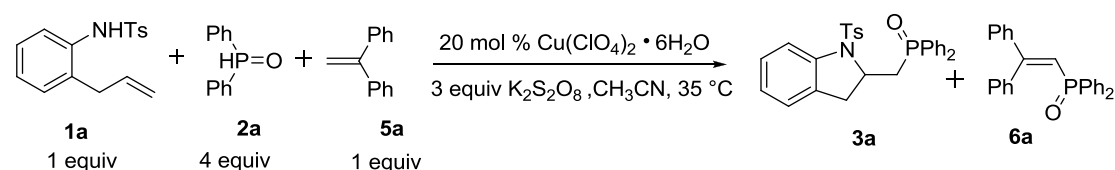

To a Schlenk tube were added **1a** (0.2 mmol), Cu(ClO<sub>4</sub>)<sub>2</sub> · 6H<sub>2</sub>O (0.04 mmol), K<sub>2</sub>S<sub>2</sub>O<sub>8</sub> (0.6 mmol), **5a** (0.2 mmol) and charged with argon for three times. Anhydrous CH<sub>3</sub>CN (2.0 mL) was added *via* syringe and the mixture was stirred at 35 °C under Ar for 5 min. Then **2a** (0.8 mmol) in CH<sub>3</sub>CN (2 mL) was added dropwise *via* an automatic syringe to the mixture in 6 hour at 35 °C under Ar atmosphere. The substrate was consumed (monitored by TLC) after the mixture was stirred for an additional hour, and then the reaction was cooled to room temperature. The solvent was removed by rotary and the resulting residue was purified by column chromatography on silica gel (eluent: hexanes/ethylacetate = 2:1) to afford the product **3a** in 57 % yield and **6a** in 28 % yield.

## VI. Control Experiments:

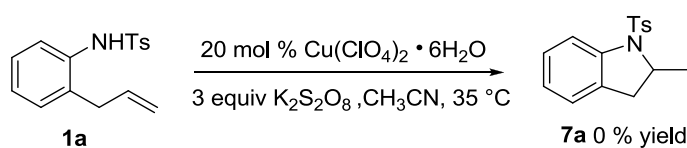

To a Schlenk tube were added **1a** (0.2 mmol), Cu(ClO<sub>4</sub>)<sub>2</sub> · 6H<sub>2</sub>O (0.04 mmol), K<sub>2</sub>S<sub>2</sub>O<sub>8</sub> (0.6 mmol) and charged with argon for three times. Anhydrous CH<sub>3</sub>CN (2.0 mL) was added *via* syringe and the mixture was stirred at 35 °C under Ar for 6 hour. The reaction was monitored by TLC and no **7a** was detected.

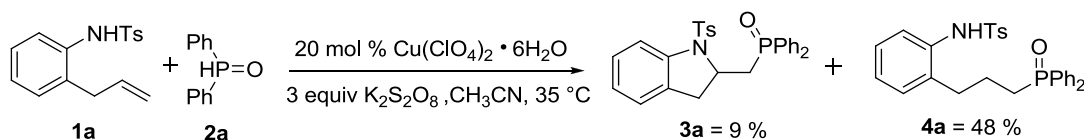

To a Schlenk tube were added **2a** (0.8 mmol), Cu(ClO<sub>4</sub>)<sub>2</sub> · 6H<sub>2</sub>O (0.04 mmol), K<sub>2</sub>S<sub>2</sub>O<sub>8</sub> (0.6 mmol), and charged with argon for three times. Anhydrous CH<sub>3</sub>CN (2.0 mL) was added *via* syringe and the mixture was stirred at 35 °C under Ar for 5 min. Then **1a** (0.2 mmol) in CH<sub>3</sub>CN (2 mL) was added dropwise *via* an automatic syringe to the mixture in 6 hour at 35 °C under Ar atmosphere. The substrate was consumed (monitored by TLC) after the mixture was stirred for an additional hour, and then the reaction was cooled to room temperature. The solvent was removed by rotary and the resulting residue was purified by column chromatography on silica gel (eluent: hexanes/ethylacetate = 2:1) to afford the product **3a** in 9 % yield and **4a** in 48 % yield.

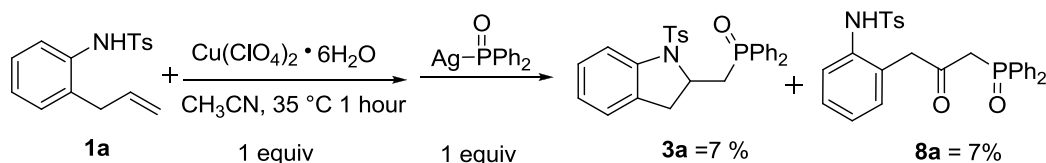

To a Schlenk tube were added **1a** (0.2 mmol), Cu(ClO<sub>4</sub>)<sub>2</sub> · 6H<sub>2</sub>O (0.2 mmol) and charged with argon for three times. Anhydrous CH<sub>3</sub>CN (2.0 mL) was added *via* syringe and the mixture was



stirred at 35 °C under Ar for 1 hour. Then Ph<sub>2</sub>(O)PAg (0.2 mmol) was added and the mixture was stirred for 6 hour. The reaction was cooled to room temperature. The solvent was removed by rotary and the resulting residue was purified by column chromatography on silica gel (eluent: hexanes/ethylacetate = 2:1) to afford the product **3a** in 7 % yield and **8a** in 7 % yield.

### VII. Plausible Mechanistic Pathway:

Considering that **2a** is added slowly in order to reduce the byproduct **4a**, we depicted a competitive alternate mechanism in Scheme S1 (Path B). Initially, **1a** reacts with copper salt in order to form the N-chelated copper complex **6A**, which is added by **2A** to give the alkyl radical **7A**. Subsequently, **7A** undergoes an intramolecular oxidative addition providing **5A** followed by reductive elimination to release the product **3a** along with copper (I). Finally, in the presence of K<sub>2</sub>S<sub>2</sub>O<sub>8</sub>, the copper (I) is oxidized to copper (II) to complete the catalytic cycle. The slight difference between Path A (Scheme 3 in paper) and Path B is whether copper catalyst is free or coordinated.

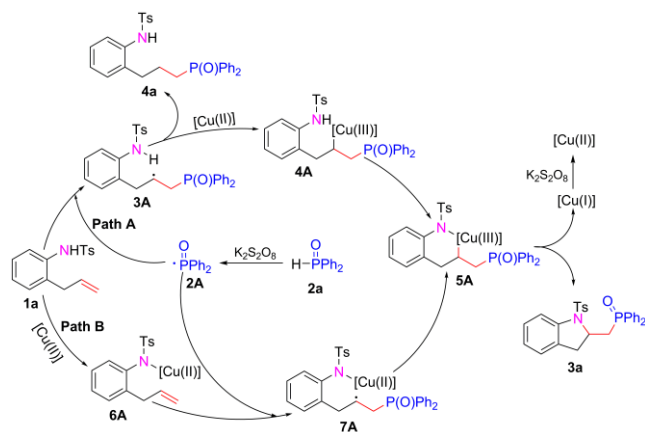

Scheme S1

### VIII. Characterization of the Products:

**Note:** **3e**, **3f**, **3g**, **3h**, **3z** and **3aa** are the mixture of diastereoisomers. **3l**, **3n** and **3v** are mixture with trace amount of unknown impurities.

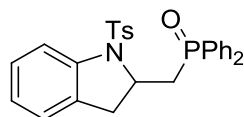

**3a:** colourless oil; 74 % yield; <sup>31</sup>P NMR (CDCl<sub>3</sub>, 162 MHz) δ: 29.38; <sup>1</sup>H NMR (CDCl<sub>3</sub>, 400 MHz) δ: 7.99-8.04 (m, 2 H), 7.69-7.76 (m, 2 H), 7.62-7.68 (m, 4 H), 7.44-7.54 (m, 3 H), 7.27-7.29 (m, 2 H), 7.19-7.22 (m, 1 H), 7.07-7.00 (m, 4 H), 4.30-4.39 (m, 1 H), 3.20-3.27 (m, 2 H), 2.91-2.98 (m, 1 H), 2.67-2.77 (m, 1 H), 2.32 (s, 3 H); <sup>13</sup>C NMR (CDCl<sub>3</sub>, 100 MHz) δ: 144.07, 140.66, 134.11, 133.54 (d, J<sub>C-P</sub> = 101.1 Hz), 132.13 (d, J<sub>C-P</sub> = 2.5 Hz), 131.97 (d, J<sub>C-P</sub> = 2.5 Hz), 131.58 (d, J<sub>C-P</sub> = 98.8 Hz), 131.35 (d, J<sub>C-P</sub> = 9.5 Hz), 131.26, 130.33 (d, J<sub>C-P</sub> = 9.6 Hz), 129.58, 128.93 (d, J<sub>C-P</sub> = 11.7 Hz), 128.75 (d, J<sub>C-P</sub> = 11.7 Hz), 127.76, 126.91, 125.46, 124.75, 116.61, 58.07, 37.18 (d, J<sub>C-P</sub> = 66.8 Hz), 35.00, 21.47; **MS (ESI):** found [M+H]<sup>+</sup> 488.1.

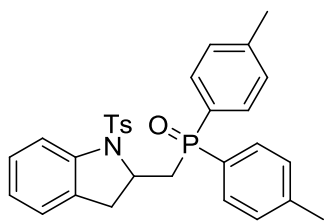

**3b**: colourless oil; 83 % yield;  $^{31}\text{P NMR}$  ( $\text{CDCl}_3$ , 162 MHz)  $\delta$ : 29.88;  $^1\text{H NMR}$  ( $\text{CDCl}_3$ , 400 MHz)  $\delta$ : 7.84-7.89 (m, 2 H), 7.57-7.66 (m, 3 H), 7.42-7.45 (m, 2 H), 7.24-7.30 (m, 4 H), 7.16-7.21 (m, 1 H), 6.99-7.07 (m, 4 H), 4.31-4.39 (m, 1 H), 3.15-3.26 (m, 2 H), 2.90-2.96 (m, 1 H), 2.63-2.73 (m, 1 H), 2.50 (s, 3 H), 2.38 (s, 3 H), 2.32 (s, 3 H);  $^{13}\text{C NMR}$  ( $\text{CDCl}_3$ , 100 MHz)  $\delta$ : 144.00, 142.50 (d,  $J_{\text{C-P}} = 2.7$  Hz), 142.37 (d,  $J_{\text{C-P}} = 2.6$  Hz), 140.68, 134.22, 131.37, 131.35 (d,  $J_{\text{C-P}} = 9.9$  Hz), 130.51 (d,  $J_{\text{C-P}} = 103.6$  Hz), 130.33 (d,  $J_{\text{C-P}} = 10.1$  Hz), 129.66, 129.54, 129.43 (d,  $J_{\text{C-P}} = 12.2$  Hz), 128.37 (d,  $J_{\text{C-P}} = 101.2$  Hz), 127.69, 126.96, 125.46, 124.69, 116.61, 58.20, 37.27 (d,  $J_{\text{C-P}} = 67.0$  Hz), 34.96, 21.66, 21.53, 21.49; **MS (ESI)**: found  $[\text{M}+\text{H}]^+$  516.2.

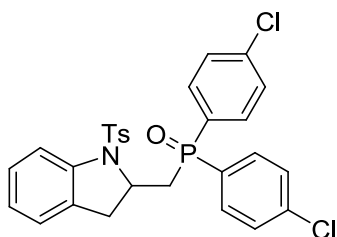

**3c**: colourless oil; 73 % yield;  $^{31}\text{P NMR}$  ( $\text{CDCl}_3$ , 162 MHz)  $\delta$ : 28.61;  $^1\text{H NMR}$  ( $\text{CDCl}_3$ , 400 MHz)  $\delta$ : 7.89-7.94 (m, 2 H), 7.60-7.67 (m, 5 H), 7.43-7.45 (m, 2 H), 7.29 (d,  $J = 8.2$  Hz, 2 H), 7.18-7.22 (m, 1 H), 7.00-7.10 (m, 4 H), 4.27-4.33 (m, 1 H), 3.16-3.20 (m, 2 H), 2.91-2.98 (m, 1 H), 2.66-2.76 (m, 1 H), 2.33 (s, 3 H);  $^{13}\text{C NMR}$  ( $\text{CDCl}_3$ , 100 MHz)  $\delta$ : 144.29, 140.50, 139.08 (d,  $J_{\text{C-P}} = 3.4$  Hz), 138.87 (d,  $J_{\text{C-P}} = 3.2$  Hz), 134.04, 132.70 (d,  $J_{\text{C-P}} = 10.3$  Hz), 132.01, 131.71 (d,  $J_{\text{C-P}} = 11.6$  Hz), 130.97, 130.20, 129.67, 129.40 (d,  $J_{\text{C-P}} = 12.6$  Hz), 129.21 (d,  $J_{\text{C-P}} = 12.6$  Hz), 127.89, 126.87, 125.47, 124.86, 116.57, 57.83, 37.06 (d,  $J_{\text{C-P}} = 67.8$  Hz), 35.00, 21.50; **MS (ESI)**: found  $[\text{M}+\text{H}]^+$  556.0.

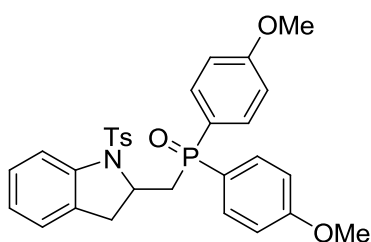

**3d**: Reaction was carried out in the presence of **1** (0.2 mmol), **2** (0.8 mmol),  $\text{Cu}(\text{ClO}_4)_2 \cdot 6\text{H}_2\text{O}$  (0.4 mmol),  $\text{K}_2\text{S}_2\text{O}_8$  (0.6 mmol) in  $\text{CH}_3\text{CN}$  (2 mL) in 6 hour at  $65^\circ\text{C}$  under Ar atmosphere. colourless oil; 53 % yield;  $^{31}\text{P NMR}$  ( $\text{CDCl}_3$ , 162 MHz)  $\delta$ : 29.53;  $^1\text{H NMR}$  ( $\text{CDCl}_3$ , 400 MHz)  $\delta$ : 7.87-7.92 (m, 2 H), 7.59-7.66 (m, 3 H), 7.30 (d,  $J = 8.2$  Hz, 2 H), 7.18-7.21 (m, 1 H), 7.12-7.14 (m, 2 H), 7.00-7.08 (m, 4 H), 6.93-6.96 (m, 2 H), 4.31-4.38 (m, 1 H), 3.93 (s, 3 H), 3.83 (s, 3 H), 3.21-3.26 (m, 1 H), 3.11-3.16 (m, 1 H), 2.90-2.96 (m, 1 H), 2.60-2.70 (m, 1 H), 2.32 (s, 3 H);  $^{13}\text{C NMR}$  ( $\text{CDCl}_3$ , 100 MHz)  $\delta$ : 162.62 (d,  $J_{\text{C-P}} = 2.6$  Hz), 162.37 (d,  $J_{\text{C-P}} = 2.7$  Hz), 144.03, 140.68, 134.23, 133.17 (d,  $J_{\text{C-P}} = 10.7$  Hz), 132.15 (d,  $J_{\text{C-P}} = 11.0$  Hz), 131.40, 129.56, 127.70, 126.95, 125.47, 124.69, 116.61, 114.44 (d,  $J_{\text{C-P}} = 12.8$  Hz), 114.24 (d,  $J_{\text{C-P}} = 12.9$  Hz), 58.25, 55.45, 55.34, 37.56 (d,  $J_{\text{C-P}} = 67.4$  Hz), 34.96, 21.48; **MS (ESI)**: found  $[\text{M}+\text{H}]^+$  548.2.

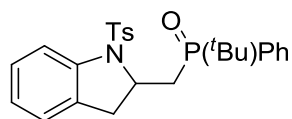

**3e:** colourless oil; 70 % yield;  $^{31}\text{P}$  NMR ( $\text{CDCl}_3$ , 162 MHz)  $\delta$ : 48.10, 44.63;  $^1\text{H}$  NMR ( $\text{CDCl}_3$ , 400 MHz)  $\delta$ : 7.96-8.01 (m, 1 H), 7.44-7.70 (m, 6 H), 7.17-7.28 (m, 3 H), 6.88-7.07 (m, 3 H), 4.77-4.85 (m, 0.43 H), 4.15-4.22 (m, 0.55 H), 2.62-3.26 (m, 3 H), 2.42-2.52 (m, 1 H), 2.28-2.35 (m, 3 H), 1.12-1.24 (m, 9 H);  $^{13}\text{C}$  NMR ( $\text{CDCl}_3$ , 100 MHz)  $\delta$ : 144.08, 143.99, 140.67, 140.60, 134.66, 134.22, 132.62, 132.54, 131.93, 131.91, 131.64, 131.61, 131.51, 131.47, 131.39, 131.31, 131.05, 129.88, 129.71, 129.52, 129.08, 128.50, 128.39, 128.30, 128.22, 128.19, 127.70, 127.68, 127.03, 126.82, 125.56, 125.34, 124.72, 124.58, 116.69, 116.57, 58.85, 58.30, 34.95, 34.93, 33.86, 33.29, 33.17, 32.59, 31.96, 31.38, 30.57, 29.99, 24.16, 24.12, 21.50, 21.41; **MS (ESI):** found  $[\text{M}+\text{H}]^+$  468.2.

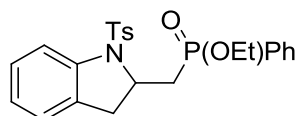

**3f:** colourless oil; 51 % yield;  $^{31}\text{P}$  NMR ( $\text{CDCl}_3$ , 162 MHz)  $\delta$ : 40.47, 39.91;  $^1\text{H}$  NMR ( $\text{CDCl}_3$ , 400 MHz)  $\delta$ : 7.87-7.92 (m, 1 H), 7.76-7.81 (m, 1 H), 7.48-7.70 (m, 5 H), 7.17-7.26 (m, 3 H), 7.00-7.07 (m, 3 H), 4.61-4.70 (m, 0.5 H), 4.06-4.19 (m, 1.5 H), 3.83-3.98 (m, 1 H), 2.78-3.14 (m, 3 H), 2.25-2.49 (m, 4 H), 1.28-1.38 (m, 3 H);  $^{13}\text{C}$  NMR ( $\text{CDCl}_3$ , 100 MHz)  $\delta$ : 144.04, 143.94, 140.86, 140.72, 134.64, 134.11, 132.58, 132.56, 132.50, 132.48, 131.91, 131.81, 131.69, 131.56, 131.47, 131.32, 131.07, 130.97, 130.45, 129.72, 129.63, 129.51, 128.87, 128.77, 128.74, 128.65, 128.48, 127.76, 127.73, 127.08, 126.99, 125.32, 125.31, 124.69, 124.64, 116.93, 116.70, 60.80, 60.75, 57.89, 57.37, 57.31, 37.82, 37.52, 36.86, 36.57, 34.85, 34.74, 21.51, 21.46, 16.51, 16.45, 16.39; **MS (ESI):** found  $[\text{M}+\text{H}]^+$  456.1.

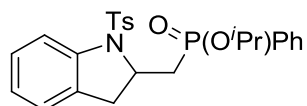

**3g:** colourless oil; 77 % yield;  $^{31}\text{P}$  NMR ( $\text{CDCl}_3$ , 162 MHz)  $\delta$ : 39.11, 38.52;  $^1\text{H}$  NMR ( $\text{CDCl}_3$ , 400 MHz)  $\delta$ : 7.89-7.94 (m, 1 H), 7.77-7.82 (m, 1 H), 7.64-7.69 (m, 1 H), 7.54-7.62 (m, 3 H), 7.46-7.51 (m, 1 H), 7.15-7.23 (m, 3 H), 7.00-7.07 (m, 3 H), 4.51-4.68 (m, 1.5 H), 4.04-4.13 (m, 0.5 H), 2.76-3.16 (m, 3 H), 2.23-2.48 (m, 4 H), 1.36-1.44 (m, 3 H), 1.15-1.22 (m, 3 H);  $^{13}\text{C}$  NMR ( $\text{CDCl}_3$ , 100 MHz)  $\delta$ : 144.04, 143.92, 140.87, 140.76, 134.62, 134.07, 132.56, 132.46, 132.44, 132.37, 132.34, 131.94, 131.84, 131.64, 131.56, 131.46, 131.40, 131.31, 131.12, 130.40, 129.77, 129.62, 129.49, 128.77, 128.65, 128.52, 127.73, 127.70, 127.09, 126.98, 125.31, 124.69, 124.62, 116.95, 116.68, 70.10, 70.03, 69.95, 69.89, 57.96, 57.40, 57.33, 38.17, 37.88, 37.21, 36.92, 34.76, 34.65, 24.62, 24.59, 24.54, 24.51, 23.98, 23.96, 23.94, 23.91, 21.52, 21.46; **MS (ESI):** found  $[\text{M}+\text{H}]^+$  470.3.

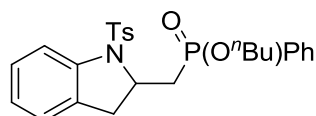

**3h:** colourless oil; 72 % yield;  $^{31}\text{P}$  NMR ( $\text{CDCl}_3$ , 162 MHz)  $\delta$ : 40.38, 39.80;  $^1\text{H}$  NMR ( $\text{CDCl}_3$ , 400 MHz)  $\delta$ : 7.87-7.92 (m, 1 H), 7.76-7.81 (m, 1 H), 7.48-7.70 (m, 5 H), 7.17-7.26 (m, 3 H), 7.01-7.07 (m, 3 H), 4.62-4.70 (m, 0.43 H), 3.99-4.17 (m, 1.58 H), 3.75-3.84 (m, 1 H), 2.78-3.15 (m, 3 H), 2.25-2.50 (m, 4 H), 1.59-1.74 (m, 2 H), 1.34-1.52 (m, 2 H), 0.88-0.99 (m, 3 H);  $^{13}\text{C}$

**NMR** (CDCl<sub>3</sub>, 100 MHz)  $\delta$ : 144.05, 143.94, 140.85, 140.73, 134.65, 134.12, 132.58, 132.55, 132.51, 132.48, 131.91, 131.81, 131.59, 131.49, 131.35, 131.08, 130.90, 130.33, 129.62, 129.51, 128.86, 128.77, 128.74, 128.65, 127.76, 127.74, 127.07, 126.99, 126.32, 125.33, 125.31, 124.71, 124.65, 116.96, 116.71, 64.47, 64.41, 64.34, 57.88, 57.39, 57.33, 37.81, 37.46, 36.85, 36.51, 34.84, 34.73, 32.59, 32.51, 32.44, 21.51, 21.46, 18.85, 18.76, 13.65, 13.55; **MS (ESI)**: found [M+H]<sup>+</sup> 484.2.

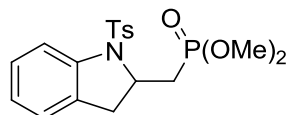

**3i**: colourless oil; 42 % yield; <sup>31</sup>P NMR (CDCl<sub>3</sub>, 162 MHz)  $\delta$ : 29.19; <sup>1</sup>H NMR (CDCl<sub>3</sub>, 400 MHz)  $\delta$ : 7.67 (d, *J* = 8.1 Hz, 1 H), 7.57 (d, *J* = 8.4 Hz, 2 H), 7.18-7.25 (m, 3 H), 7.03-7.09 (m, 2 H), 4.47-4.55 (m, 1 H), 3.76-3.84 (m, 6 H), 2.98-2.96 (m, 2 H), 2.58-2.68 (m, 1 H), 2.37 (s, 3 H), 2.18-2.26 (m, 1 H); <sup>13</sup>C NMR (CDCl<sub>3</sub>, 100 MHz)  $\delta$ : 144.13, 140.67, 134.68, 131.04, 129.69, 127.87, 127.04, 125.35, 124.80, 116.88, 57.81, 52.60, 52.42 (d, *J*<sub>C-P</sub> = 6.5 Hz), 34.65, 32.49 (d, *J*<sub>C-P</sub> = 134.5 Hz), 21.50; **MS (ESI)**: found [M+H]<sup>+</sup> 396.1.

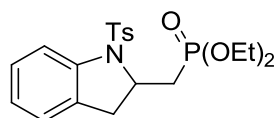

**3j**: colourless oil; 53 % yield; <sup>31</sup>P NMR (CDCl<sub>3</sub>, 162 MHz)  $\delta$ : 26.44; <sup>1</sup>H NMR (CDCl<sub>3</sub>, 400 MHz)  $\delta$ : 7.67 (d, *J* = 8.1 Hz, 1 H), 7.56 (d, *J* = 8.2 Hz, 2 H), 7.17-7.24 (m, 3 H), 7.02-7.08 (m, 2 H), 4.46-4.55 (m, 1 H), 4.07-4.21 (m, 4 H), 2.91-3.03 (m, 2 H), 2.56-2.66 (m, 1 H), 2.36 (s, 3 H), 2.14-2.24 (m, 1 H), 1.33-1.41 (m, 6 H); <sup>13</sup>C NMR (CDCl<sub>3</sub>, 100 MHz)  $\delta$ : 144.10, 140.73, 134.67, 131.17, 129.67, 127.82, 127.03, 125.33, 124.77, 116.92, 61.60 (d, *J*<sub>C-P</sub> = 6.6 Hz), 61.87 (d, *J*<sub>C-P</sub> = 6.3 Hz), 57.96 (d, *J*<sub>C-P</sub> = 2.3 Hz), 34.61, 33.31 (d, *J*<sub>C-P</sub> = 134.4 Hz), 21.50, 16.45, 16.42, 16.39, 16.36; **MS (ESI)**: found [M+H]<sup>+</sup> 424.1.

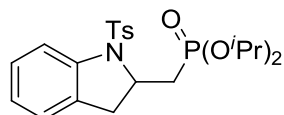

**3k**: colourless oil; 61 % yield; <sup>31</sup>P NMR (CDCl<sub>3</sub>, 162 MHz)  $\delta$ : 24.24; <sup>1</sup>H NMR (CDCl<sub>3</sub>, 400 MHz)  $\delta$ : 7.67 (d, *J* = 8.1 Hz, 1 H), 7.56 (d, *J* = 8.3 Hz, 2 H), 7.18-7.25 (m, 3 H), 7.02-7.08 (m, 2 H), 4.68-4.80 (m, 2 H), 4.46-4.55 (m, 1 H), 3.03-3.08 (m, 1 H), 2.87-2.93 (m, 1 H), 2.52-2.61 (m, 1 H), 2.37 (s, 3 H), 2.09-2.20 (m, 1 H), 1.33-1.40 (m, 12 H); <sup>13</sup>C NMR (CDCl<sub>3</sub>, 100 MHz)  $\delta$ : 144.02, 140.79, 134.80, 131.37, 129.62, 127.77, 127.04, 125.31, 124.74, 117.05, 70.64 (d, *J*<sub>C-P</sub> = 6.8 Hz), 70.61 (d, *J*<sub>C-P</sub> = 6.5 Hz), 58.23 (d, *J*<sub>C-P</sub> = 2.5 Hz), 34.69 (d, *J*<sub>C-P</sub> = 135.9 Hz), 34.42, 24.12, 24.08, 24.04, 24.00, 21.50; **MS (ESI)**: found [M+H]<sup>+</sup> 452.1.

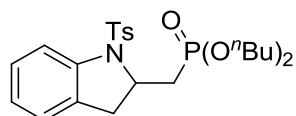

**3l**: colourless oil; 53 % yield; <sup>31</sup>P NMR (CDCl<sub>3</sub>, 162 MHz)  $\delta$ : 26.41; <sup>1</sup>H NMR (CDCl<sub>3</sub>, 400 MHz)  $\delta$ : 7.67 (d, *J* = 8.0 Hz, 1 H), 7.56 (d, *J* = 7.9 Hz, 2 H), 7.17-7.23 (m, 3 H), 7.03-7.06 (m, 2 H), 4.47-4.54 (m, 1 H), 4.03-4.12 (m, 4 H), 2.90-3.04 (m, 2 H), 2.58-2.66 (m, 1 H), 2.37 (s, 3 H), 2.13-2.24 (m, 1 H), 1.65-1.74 (m, 4 H), 1.39-1.50 (m, 4 H), 0.94-1.01 (m, 6 H); <sup>13</sup>C NMR (CDCl<sub>3</sub>, 100 MHz)  $\delta$ : 144.05, 140.77, 134.78, 131.20, 129.63, 127.81, 127.03, 125.31, 124.75, 116.95, 65.66 (d, *J*<sub>C-P</sub> = 7.1 Hz), 58.01, 34.57, 33.20 (d, *J*<sub>C-P</sub> = 125.5 Hz), 32.78, 32.48, 21.47, 18.79, 18.75,

13.61, 13.56; **MS (ESI)**: found  $[M+H]^+$  480.1.

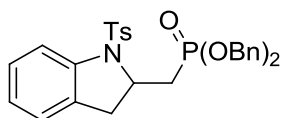

**3m**: colourless oil; 45 % yield;  $^{31}\text{P}$  NMR ( $\text{CDCl}_3$ , 162 MHz)  $\delta$ : 27.55;  $^1\text{H}$  NMR ( $\text{CDCl}_3$ , 400 MHz)  $\delta$ : 7.66 (d,  $J = 8.0$  Hz, 1 H), 7.47 (d,  $J = 8.3$  Hz, 2 H), 7.32-7.42 (m, 10 H), 7.20-7.24 (m, 1 H), 7.11 (d,  $J = 8.1$  Hz, 2 H), 7.00-7.05 (m, 2 H), 4.98-5.15 (m, 4 H), 4.43-4.52 (m, 1 H), 2.69-2.99 (m, 3 H), 2.35 (s, 3 H), 2.18-2.29 (m, 1 H);  $^{13}\text{C}$  NMR ( $\text{CDCl}_3$ , 100 MHz)  $\delta$ : 144.02, 140.69, 136.18 (d,  $J_{\text{C-P}} = 6.4$  Hz), 136.08 (d,  $J_{\text{C-P}} = 6.1$  Hz), 134.51, 131.04, 129.62, 128.65, 128.49 (d,  $J_{\text{C-P}} = 4.0$  Hz), 127.97 (d,  $J_{\text{C-P}} = 4.6$  Hz), 127.83, 127.06, 125.31, 124.75, 116.89, 67.44 (d,  $J_{\text{C-P}} = 6.7$  Hz), 67.43 (d,  $J_{\text{C-P}} = 6.7$  Hz), 57.82 (d,  $J_{\text{C-P}} = 2.4$  Hz), 34.59, 33.67 (d,  $J_{\text{C-P}} = 134.8$  Hz), 21.51; **MS (ESI)**: found  $[M+H]^+$  548.1.

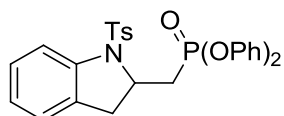

**3n**: colourless oil; 31 % yield;  $^{31}\text{P}$  NMR ( $\text{CDCl}_3$ , 162 MHz)  $\delta$ : 19.69;  $^1\text{H}$  NMR ( $\text{CDCl}_3$ , 400 MHz)  $\delta$ : 7.70 (d,  $J = 8.1$  Hz, 1 H), 7.54 (d,  $J = 8.3$  Hz, 2 H), 7.36-7.42 (m, 2 H), 7.28-7.34 (m, 4 H), 7.22-7.27 (m, 2 H), 7.16-7.20 (m, 5 H), 7.04-7.09 (m, 2 H), 4.64-4.73 (m, 1 H), 3.11-3.16 (m, 2 H), 2.95-3.04 (m, 2 H), 2.48-2.59 (m, 1 H), 2.37 (s, 3 H);  $^{13}\text{C}$  NMR ( $\text{CDCl}_3$ , 100 MHz)  $\delta$ : 150.26 (d,  $J_{\text{C-P}} = 9.0$  Hz), 150.00 (d,  $J_{\text{C-P}} = 8.8$  Hz), 144.22, 140.62, 134.49, 130.98 129.90 (d,  $J_{\text{C-P}} = 4.4$  Hz), 129.71, 127.96, 127.07, 125.40, 124.97, 120.61, 120.58, 120.56, 120.54, 117.11, 57.66 (d,  $J_{\text{C-P}} = 2.9$  Hz), 34.68, 33.97 (d,  $J_{\text{C-P}} = 135.0$  Hz), 21.52; **MS (ESI)**: found  $[M+H]^+$  520.1.

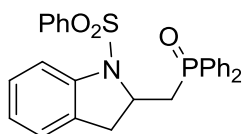

**3p**: colourless oil; 65 % yield;  $^{31}\text{P}$  NMR ( $\text{CDCl}_3$ , 162 MHz)  $\delta$ : 29.58;  $^1\text{H}$  NMR ( $\text{CDCl}_3$ , 400 MHz)  $\delta$ : 7.98-8.01 (m, 2 H), 7.67-7.74 (m, 2 H), 7.60-7.66 (m, 4 H), 7.42-7.52 (m, 4 H), 7.37-7.39 (m, 2 H), 7.23-7.27 (m, 2 H), 7.17-7.21 (m, 1 H), 6.99-7.04 (m, 2 H), 4.29-4.38 (m, 1 H), 3.17-3.25 (m, 2 H), 2.87-2.93 (m, 1 H), 2.66-2.76 (m, 1 H);  $^{13}\text{C}$  NMR ( $\text{CDCl}_3$ , 100 MHz)  $\delta$ : 140.41, 136.97, 133.75 (d,  $J_{\text{C-P}} = 101.1$  Hz), 133.07, 132.07 (d,  $J_{\text{C-P}} = 2.7$  Hz), 131.91 (d,  $J_{\text{C-P}} = 2.7$  Hz), 131.38 (d,  $J_{\text{C-P}} = 98.7$  Hz), 131.25 (d,  $J_{\text{C-P}} = 9.3$  Hz), 131.16, 130.24 (d,  $J_{\text{C-P}} = 9.5$  Hz), 128.88, 128.86 (d,  $J_{\text{C-P}} = 11.7$  Hz), 128.68 (d,  $J_{\text{C-P}} = 11.8$  Hz), 127.73, 126.77, 125.43, 124.79, 116.54, 58.06, 37.01 (d,  $J_{\text{C-P}} = 66.9$  Hz), 34.84; **MS (ESI)**: found  $[M+H]^+$  474.1.

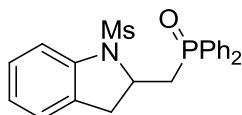

**3q**: colourless oil; 61 % yield;  $^{31}\text{P}$  NMR ( $\text{CDCl}_3$ , 162 MHz)  $\delta$ : 29.38;  $^1\text{H}$  NMR ( $\text{CDCl}_3$ , 400 MHz)  $\delta$ : 7.92-7.97 (m, 2 H), 7.67-7.72 (m, 2 H), 7.55-7.60 (m, 3 H), 7.40-7.52 (m, 4 H), 7.17-7.21 (m, 2 H), 7.05-7.09 (m, 1 H), 4.53-4.61 (m, 1 H), 3.51-3.42 (m, 2 H), 3.16-3.23 (m, 1 H), 2.75 (s, 3 H), 2.66-2.73 (m, 1 H);  $^{13}\text{C}$  NMR ( $\text{CDCl}_3$ , 100 MHz)  $\delta$ : 140.39, 133.65 (d,  $J_{\text{C-P}} = 101.1$  Hz), 132.20 (d,  $J_{\text{C-P}} = 2.8$  Hz), 131.93 (d,  $J_{\text{C-P}} = 2.2$  Hz), 131.38 (d,  $J_{\text{C-P}} = 99.1$  Hz), 131.15 (d,  $J_{\text{C-P}} = 9.4$  Hz), 130.69, 130.29 (d,  $J_{\text{C-P}} = 9.6$  Hz), 128.95 (d,  $J_{\text{C-P}} = 11.9$  Hz), 128.74 (d,  $J_{\text{C-P}} = 12.0$  Hz), 128.05, 125.79, 124.72, 115.23, 58.93, 37.24 (d,  $J_{\text{C-P}} = 66.7$  Hz), 35.82, 35.10; **MS (ESI)**: found  $[M+H]^+$

412.1.

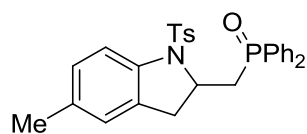

**3r**: colourless oil; 45 % yield;  $^{31}\text{P NMR}$  ( $\text{CDCl}_3$ , 162 MHz)  $\delta$ : 29.61;  $^1\text{H NMR}$  ( $\text{CDCl}_3$ , 400 MHz)  $\delta$ : 7.95-8.00 (m, 2 H), 7.68-7.73 (m, 2 H), 7.60-7.65 (m, 3 H), 7.48-7.52 (m, 2 H), 7.41-7.46 (m, 2 H), 7.24 (d,  $J = 8.3$  Hz, 2 H), 7.04 (d,  $J = 8.1$  Hz, 2 H), 6.98 (d,  $J = 7.7$  Hz, 1 H), 6.83 (s, 1 H), 4.26-4.33 (m, 1 H), 3.16-3.22 (m, 2 H), 2.83-2.90 (m, 1 H), 2.66-2.76 (m, 1 H), 2.30 (s, 3 H), 2.25 (s, 3 H);  $^{13}\text{C NMR}$  ( $\text{CDCl}_3$ , 100 MHz)  $\delta$ : 143.93, 138.24, 134.54, 134.07, 133.60 (d,  $J_{\text{C-P}} = 101.1$  Hz), 132.09 (d,  $J_{\text{C-P}} = 2.7$  Hz), 131.94 (d,  $J_{\text{C-P}} = 2.7$  Hz), 131.54 (d,  $J_{\text{C-P}} = 98.8$  Hz), 131.41, 131.36 (d,  $J_{\text{C-P}} = 9.4$  Hz), 130.32 (d,  $J_{\text{C-P}} = 9.5$  Hz), 129.54, 128.91 (d,  $J_{\text{C-P}} = 11.8$  Hz), 128.73 (d,  $J_{\text{C-P}} = 11.9$  Hz), 128.36, 126.95, 126.02, 116.47, 58.16 (d,  $J_{\text{C-P}} = 0.8$  Hz), 37.14 (d,  $J_{\text{C-P}} = 66.8$  Hz), 34.98, 21.47, 20.93; **MS (ESI)**: found  $[\text{M}+\text{H}]^+$  502.1.

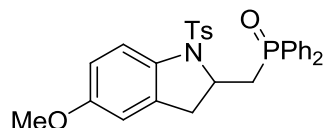

**3s**: Reaction was carried out in the presence of **1** (0.2 mmol), **2** (0.8 mmol),  $\text{Cu}(\text{ClO}_4)_2 \cdot 6\text{H}_2\text{O}$  (0.4 mmol),  $\text{K}_2\text{S}_2\text{O}_8$  (0.6 mmol) in  $\text{CH}_3\text{CN}$  (2 mL) in 6 hour at 65 °C under Ar atmosphere. colourless oil; 55 % yield;  $^{31}\text{P NMR}$  ( $\text{CDCl}_3$ , 162 MHz)  $\delta$ : 29.46;  $^1\text{H NMR}$  ( $\text{CDCl}_3$ , 400 MHz)  $\delta$ : 7.96-8.01 (m, 2 H), 7.69-7.74 (m, 2 H), 7.61-7.66 (m, 3 H), 7.43-7.56 (m, 4 H), 7.24 (d,  $J = 7.9$  Hz, 2 H), 7.05 (d,  $J = 8.2$  Hz, 2 H), 6.73-6.76 (m, 1 H), 6.59 (d,  $J = 1.9$  Hz, 1 H), 4.29-4.36 (m, 1 H), 3.74 (s, 3 H), 3.13-3.18 (m, 2 H), 2.78-2.85 (m, 1 H), 2.64-2.74 (m, 1 H), 2.31 (s, 3 H);  $^{13}\text{C NMR}$  ( $\text{CDCl}_3$ , 100 MHz)  $\delta$ : 157.48, 143.92, 133.95, 133.90, 133.22, 133.61 (d,  $J_{\text{C-P}} = 100.9$  Hz), 132.09 (d,  $J_{\text{C-P}} = 2.7$  Hz), 131.93 (d,  $J_{\text{C-P}} = 2.6$  Hz), 131.57 (d,  $J_{\text{C-P}} = 98.8$  Hz), 131.33 (d,  $J_{\text{C-P}} = 9.4$  Hz), 130.32 (d,  $J_{\text{C-P}} = 9.6$  Hz), 129.52, 128.93 (d,  $J_{\text{C-P}} = 12.8$  Hz), 128.73 (d,  $J_{\text{C-P}} = 11.9$  Hz), 126.99, 117.90, 113.17, 110.89, 58.39 (d,  $J_{\text{C-P}} = 1.1$  Hz), 55.57, 37.01 (d,  $J = 66.9$  Hz), 35.11, 21.47; **MS (ESI)**: found  $[\text{M}+\text{H}]^+$  518.1.

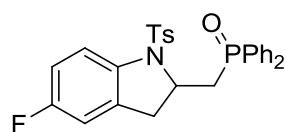

**3t**: colourless oil; 75 % yield;  $^{31}\text{P NMR}$  ( $\text{CDCl}_3$ , 162 MHz)  $\delta$ : 29.30;  $^1\text{H NMR}$  ( $\text{CDCl}_3$ , 400 MHz)  $\delta$ : 7.96-8.00 (m, 2 H), 7.69-7.74 (m, 2 H), 7.55-7.64 (m, 4 H), 7.42-7.52 (m, 3 H), 7.21 (d,  $J = 8.2$  Hz, 2 H), 7.06 (d,  $J = 8.1$  Hz, 2 H), 7.85-7.90 (m, 1 H), 6.73 (d,  $J = 8.0$  Hz, 1 H), 4.31-4.38 (m, 1 H), 3.14-3.24 (m, 2 H), 2.83-2.90 (m, 1 H), 2.65-2.75 (m, 1 H), 2.31 (s, 3 H);  $^{13}\text{C NMR}$  ( $\text{CDCl}_3$ , 100 MHz)  $\delta$ : 160.37 (d,  $J_{\text{C-F}} = 243.3$  Hz), 144.24, 136.71 (d,  $J_{\text{C-F}} = 2.1$  Hz), 133.75, 133.64 (d,  $J_{\text{C-F}} = 8.7$  Hz), 133.41 (d,  $J_{\text{C-P}} = 101.2$  Hz), 132.16 (d,  $J_{\text{C-P}} = 2.6$  Hz), 132.01 (d,  $J_{\text{C-P}} = 2.5$  Hz), 131.47 (d,  $J_{\text{C-P}} = 98.7$  Hz), 131.30 (d,  $J_{\text{C-P}} = 9.4$  Hz), 130.32 (d,  $J_{\text{C-P}} = 9.7$  Hz), 129.64, 128.98 (d,  $J_{\text{C-P}} = 11.8$  Hz), 128.76 (d,  $J_{\text{C-P}} = 11.9$  Hz), 126.94, 117.80 (d,  $J_{\text{C-F}} = 8.6$  Hz), 114.41 (d,  $J_{\text{C-F}} = 23.5$  Hz), 112.56 (d,  $J_{\text{C-F}} = 23.9$  Hz), 58.57 (d,  $J_{\text{C-P}} = 1.0$  Hz), 37.04 (d,  $J = 66.8$  Hz), 34.92, 21.47;  $^{19}\text{F NMR}$  ( $\text{CDCl}_3$ , 376 MHz)  $\delta$ : -118.08; **MS (ESI)**: found  $[\text{M}+\text{H}]^+$  506.1.

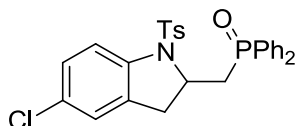

**3u**: colourless oil; 70 % yield;  $^{31}\text{P}$  NMR ( $\text{CDCl}_3$ , 162 MHz)  $\delta$ : 29.35;  $^1\text{H}$  NMR ( $\text{CDCl}_3$ , 400 MHz)  $\delta$ : 7.95-8.00 (m, 2 H), 7.68-7.74 (m, 2 H), 7.60-7.67 (m, 3 H), 7.49-7.56 (m, 2 H), 7.43-7.47 (m, 2 H), 7.24 (d,  $J = 8.3$  Hz, 2 H), 7.13-7.16 (m, 1 H), 7.07 (d,  $J = 8.1$  Hz, 2 H), 7.00 (s, 1 H), 4.28-4.36 (m, 1 H), 3.17-3.24 (m, 2 H), 2.87-2.93 (m, 1 H), 2.64-2.74 (m, 1 H), 2.32 (s, 3 H);  $^{13}\text{C}$  NMR ( $\text{CDCl}_3$ , 100 MHz)  $\delta$ : 144.38, 139.43, 133.75, 133.35 (d,  $J_{\text{C-P}} = 101.3$  Hz), 133.27, 132.18 (d,  $J_{\text{C-P}} = 2.7$  Hz), 132.06 (d,  $J_{\text{C-P}} = 2.7$  Hz), 131.42 (d,  $J_{\text{C-P}} = 98.9$  Hz), 131.32 (d,  $J_{\text{C-P}} = 9.3$  Hz), 131.12 (d,  $J_{\text{C-P}} = 9.6$  Hz), 120.00, 129.73, 129.75 (d,  $J_{\text{C-P}} = 11.7$  Hz), 129.58 (d,  $J_{\text{C-P}} = 11.9$  Hz), 128.65, 127.68, 126.34, 118.24, 58.77, 37.35 (d,  $J_{\text{C-P}} = 66.7$  Hz), 35.02, 21.64; **MS (ESI)**: found  $[\text{M}+\text{H}]^+$  522.1.

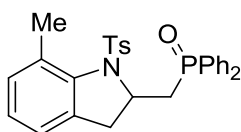

**3v**: colourless oil; 73 % yield;  $^{31}\text{P}$  NMR ( $\text{CDCl}_3$ , 162 MHz)  $\delta$ : 29.99;  $^1\text{H}$  NMR ( $\text{CDCl}_3$ , 400 MHz)  $\delta$ : 7.87-7.92 (m, 2 H), 7.59-7.65 (m, 5 H), 7.44-7.46 (m, 1 H), 7.37-7.42 (m, 2 H), 7.08-7.15 (m, 3 H), 7.02-7.06 (m, 3 H), 6.85 (d,  $J = 9.2$  Hz, 1 H), 4.51-4.58 (m, 1 H), 2.71-2.77 (m, 2 H), 2.53 (s, 3 H), 2.37-2.48 (m, 1 H), 2.33 (s, 3 H), 2.07-2.13 (m, 1 H);  $^{13}\text{C}$  NMR ( $\text{CDCl}_3$ , 100 MHz)  $\delta$ : 143.98, 139.77, 135.81, 134.13, 133.45 (d,  $J_{\text{C-P}} = 101.0$  Hz), 132.64, 132.11 (d,  $J_{\text{C-P}} = 2.3$  Hz), 131.83 (d,  $J_{\text{C-P}} = 2.4$  Hz), 131.27 (d,  $J_{\text{C-P}} = 99.2$  Hz), 131.13 (d,  $J_{\text{C-P}} = 9.3$  Hz), 130.31, 130.22 (d,  $J_{\text{C-P}} = 9.7$  Hz), 129.35, 128.91 (d,  $J_{\text{C-P}} = 11.8$  Hz), 128.61 (d,  $J_{\text{C-P}} = 12.0$  Hz), 127.35, 126.66, 122.74, 59.69, 35.18 (d,  $J_{\text{C-P}} = 67.7$  Hz), 34.38, 21.47, 19.90; **MS (ESI)**: found  $[\text{M}+\text{H}]^+$  502.1.

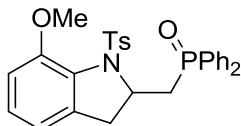

**3w**: colourless oil; 60 % yield;  $^{31}\text{P}$  NMR ( $\text{CDCl}_3$ , 162 MHz)  $\delta$ : 29.70;  $^1\text{H}$  NMR ( $\text{CDCl}_3$ , 400 MHz)  $\delta$ : 7.86-7.91 (m, 2 H), 7.57-7.66 (m, 5 H), 7.39-7.48 (m, 3 H), 7.32 (d,  $J = 8.2$  Hz, 2 H), 7.07-7.10 (m, 3 H), 6.82 (d,  $J = 9.2$  Hz, 1 H), 6.68 (d,  $J = 7.4$  Hz, 1 H), 4.67-4.73 (m, 1 H), 3.86 (s, 3 H), 2.95 (d,  $J = 16.4$  Hz, 1 H), 2.79-2.86 (m, 1 H), 2.43-2.56 (m, 2 H), 2.35 (s, 3 H);  $^{13}\text{C}$  NMR ( $\text{CDCl}_3$ , 100 MHz)  $\delta$ : 152.56, 143.78, 137.11, 135.27, 133.62 (d,  $J_{\text{C-P}} = 100.9$  Hz), 132.15, 131.88, 131.14 (d,  $J_{\text{C-P}} = 9.4$  Hz), 130.90, 130.26 (d,  $J_{\text{C-P}} = 9.6$  Hz), 129.33, 128.97 (d,  $J_{\text{C-P}} = 12.8$  Hz), 128.68 (d,  $J_{\text{C-P}} = 12.9$  Hz), 127.70, 127.36, 117.88, 112.06, 60.22, 56.08, 35.48 (d,  $J = 67.2$  Hz), 34.86, 21.52; **MS (ESI)**: found  $[\text{M}+\text{H}]^+$  518.1.

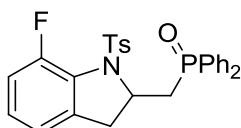

**3x**: colourless solid; 66 % yield;  $^{31}\text{P}$  NMR ( $\text{CDCl}_3$ , 162 MHz)  $\delta$ : 29.50;  $^1\text{H}$  NMR ( $\text{CDCl}_3$ , 400 MHz)  $\delta$ : 7.89-7.95 (m, 2 H), 7.60-7.68 (m, 5 H), 7.47-7.51 (m, 1 H), 7.41-7.45 (m, 2 H), 7.31 (d,  $J = 8.3$  Hz, 2 H), 7.04-7.11 (m, 3 H), 6.97-7.01 (m, 1 H), 6.86 (d,  $J = 7.3$  Hz, 1 H), 4.58-4.64 (m, 1

H), 3.10 (d,  $J = 16.6$  Hz, 1 H), 2.84-2.90 (m, 1 H), 2.48-2.61 (m, 2 H), 2.35 (s, 3 H);  $^{13}\text{C}$  NMR (CDCl<sub>3</sub>, 100 MHz)  $\delta$ : 155.11 (d,  $J_{\text{C-F}} = 255.2$  Hz), 144.29, 137.86, 134.43, 133.41 (d,  $J_{\text{C-P}} = 101.7$  Hz), 132.26 (d,  $J_{\text{C-P}} = 2.4$  Hz), 132.01 (d,  $J_{\text{C-P}} = 2.4$  Hz), 131.22 (d,  $J_{\text{C-P}} = 99.2$  Hz), 131.17 (d,  $J_{\text{C-P}} = 9.3$  Hz), 130.25 (d,  $J_{\text{C-P}} = 9.7$  Hz), 129.63, 129.03 (d,  $J_{\text{C-P}} = 11.8$  Hz), 128.75 (d,  $J_{\text{C-P}} = 12.0$  Hz), 127.75 (d,  $J_{\text{C-F}} = 10.4$  Hz), 127.50 (d,  $J_{\text{C-F}} = 6.8$  Hz), 127.29, 121.20 (d,  $J_{\text{C-F}} = 3.4$  Hz), 116.00 (d,  $J_{\text{C-F}} = 20.3$  Hz), 60.40, 36.66 (d,  $J = 67.0$  Hz), 34.75, 21.54;  $^{19}\text{F}$  NMR (CDCl<sub>3</sub>, 376 MHz)  $\delta$  : -118.75; **MS (ESI)**: found  $[\text{M}+\text{H}]^+$  506.1.

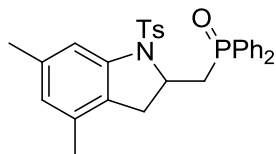

**3y**: colourless oil; 64 % yield;  $^{31}\text{P}$  NMR (CDCl<sub>3</sub>, 162 MHz)  $\delta$ : 29.42;  $^1\text{H}$  NMR (CDCl<sub>3</sub>, 400 MHz)  $\delta$ : 7.98-8.03 (m, 2 H), 7.71-7.76 (m, 2 H), 7.62-7.66 (m, 3 H), 7.43-7.53 (m, 3 H), 7.33 (s, 1 H), 7.26 (d,  $J = 8.2$  Hz, 2 H), 7.06 (d,  $J = 8.2$  Hz, 2 H), 6.66 (s, 1 H), 4.29-4.37 (m, 1 H), 3.23-3.29 (m, 1 H), 3.05-3.10 (m, 1 H), 2.67-2.86 (m, 2 H), 2.31-2.32 (m, 6 H), 2.05 (s, 3 H);  $^{13}\text{C}$  NMR (CDCl<sub>3</sub>, 100 MHz)  $\delta$ : 143.80, 140.40, 137.73, 134.48, 134.10, 133.57 (d,  $J_{\text{C-P}} = 100.7$  Hz), 131.96 (d,  $J_{\text{C-P}} = 2.7$  Hz), 131.82 (d,  $J_{\text{C-P}} = 2.7$  Hz), 131.60 (d,  $J_{\text{C-P}} = 98.5$  Hz), 131.29 (d,  $J_{\text{C-P}} = 9.4$  Hz), 130.24 (d,  $J_{\text{C-P}} = 9.5$  Hz), 129.45, 128.78 (d,  $J_{\text{C-P}} = 11.9$  Hz), 128.64 (d,  $J_{\text{C-P}} = 11.9$  Hz), 126.86, 126.81, 126.46, 114.31, 58.07, 37.38 (d,  $J_{\text{C-P}} = 66.9$  Hz), 33.71, 21.43, 21.39, 18.57; **MS (ESI)**: found  $[\text{M}+\text{H}]^+$  516.1.

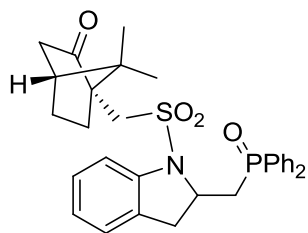

**3z**: colourless solid; 63 % yield;  $^{31}\text{P}$  NMR (CDCl<sub>3</sub>, 162 MHz)  $\delta$ : 29.67;  $^1\text{H}$  NMR (CDCl<sub>3</sub>, 400 MHz)  $\delta$ : 7.92-7.97 (m, 2 H), 7.65-7.71 (m, 2 H), 7.50-7.56 (m, 3 H), 7.39-7.45 (m, 4 H), 7.16-7.19 (m, 2 H), 7.01-7.05 (m, 1 H), 4.57-4.63 (m, 1 H), 3.46-3.50 (m, 2 H), 3.19-3.32 (m, 2 H), 2.64-2.82 (m, 2 H), 2.42-2.54 (m, 1 H), 2.30-2.34 (m, 1 H), 2.03-2.07 (m, 2 H), 1.86-1.91 (m, 1 H), 1.54-1.60 (m, 1 H), 1.37-1.42 (m, 1 H), 1.11-1.12 (m, 3 H), 0.77-0.80 (m, 3 H);  $^{13}\text{C}$  NMR (CDCl<sub>3</sub>, 100 MHz)  $\delta$ : 214.70, 214.63, 140.55, 140.42, 132.14, 131.93, 131.26, 131.17, 130.76, 130.62, 130.36, 130.26, 130.23, 129.07, 128.97, 128.85, 128.79, 128.75, 128.68, 128.63, 128.05, 127.89, 125.89, 125.79, 124.33, 114.65, 114.42, 58.86, 58.28, 58.26, 47.92, 47.73, 45.73, 45.68, 42.98, 42.88, 42.48, 42.45, 37.74, 37.43, 37.07, 36.77, 35.04, 34.91, 26.89, 26.83, 25.52, 25.33, 20.09, 20.04, 19.76, 19.73; **MS (ESI)**: found  $[\text{M}+\text{H}]^+$  548.2.

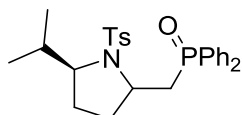

**3aa**: colourless oil; 49 % yield;  $^{31}\text{P}$  NMR (CDCl<sub>3</sub>, 162 MHz)  $\delta$ : 29.29, 29.73;  $^1\text{H}$  NMR (CDCl<sub>3</sub>, 400 MHz)  $\delta$ : 7.94-8.037 (m, 2 H), 7.73-7.79 (m, 2 H), 7.56-7.65 (m, 3 H), 7.42-7.52 (m, 4 H), 7.28-7.32 (m, 1 H), 7.12-7.16 (m, 2 H), 4.05-4.10 (m, 0.46 H), 3.89-3.92 (m, 0.46 H), 3.48-3.62 (m, 1 H), 3.30-3.382 (m, 1 H), 2.28-2.48 (m, 5 H), 1.98-2.06 (m, 1.13 H), 1.88-1.957 (m, 0.63 H), 1.71-1.83 (m, 1.49 H), 1.62-1.68 (m, 0.63 H), 1.11-1.17 (m, 0.59 H), 0.98-1.00 (m, 1.64 H),



0.91-0.93 (m, 1.71 H), 0.79-0.81 (m, 1.44 H), 0.24-0.25 (m, 1.34 H);  $^{13}\text{C NMR}$  ( $\text{CDCl}_3$ , 100 MHz)  $\delta$ : 143.37, 142.77, 139.00, 134.52, 134.19, 133.75, 133.52, 133.19, 132.15, 132.08, 131.93, 131.91, 131.87, 131.81, 131.79, 131.53, 131.47, 131.44, 131.37, 131.17, 131.11, 130.43, 130.35, 130.33, 130.26, 129.54, 129.36, 128.88, 128.80, 128.77, 128.69, 128.65, 127.46, 126.56, 67.36, 65.04, 57.07, 57.05, 56.77, 38.14, 37.48, 35.24, 34.59, 31.68, 31.18, 31.01, 29.03, 25.60, 23.08, 21.45, 21.43, 20.10, 19.89, 17.70, 15.38; **MS (ESI)**: found  $[\text{M}+\text{H}]^+$  482.2.

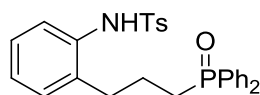

**4a**: colourless oil;  $^{31}\text{P NMR}$  ( $\text{CDCl}_3$ , 162 MHz)  $\delta$ : 34.68;  $^1\text{H NMR}$  ( $\text{CDCl}_3$ , 400 MHz)  $\delta$ : 9.45(s), 7.71-7.76 (m, 4 H), 7.66 (d,  $J = 8.2$  Hz, 2 H), 7.39-7.53 (m, 7 H), 7.01-7.13 (m, 5 H), 2.46-2.50 (m, 2 H), 2.33 (s, 3 H), 2.05-2.11 (m, 2 H), 1.75-1.87 (m, 2 H);  $^{13}\text{C NMR}$  ( $\text{CDCl}_3$ , 100 MHz)  $\delta$ : 142.83, 137.79, 135.51, 134.79, 132.31 (d,  $J_{\text{C-P}} = 99.1$  Hz), 131.91 (d,  $J_{\text{C-P}} = 2.5$  Hz), 130.90, 130.81, 129.44, 129.26, 128.80, 128.69, 127.25, 126.96, 125.98 (d,  $J_{\text{C-P}} = 6.9$  Hz), 29.22 (d,  $J_{\text{C-P}} = 5.5$  Hz), 26.83 (d,  $J_{\text{C-P}} = 4.3$  Hz), 23.20 (d,  $J_{\text{C-P}} = 71.0$  Hz), 21.50; **MS (ESI)**: found  $[\text{M}+\text{H}]^+$  490.1.

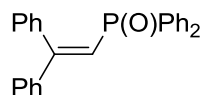

**6a**: white solid;  $^{31}\text{P NMR}$  ( $\text{CDCl}_3$ , 162 MHz)  $\delta$ : 18.75, 18.66;  $^1\text{H NMR}$  ( $\text{CDCl}_3$ , 400 MHz)  $\delta$ : 7.68-7.74 (m, 4 H), 7.29-7.39 (m, 11 H), 7.24-7.27 (m, 2 H), 7.07-7.16 (m, 3 H), 6.82 (d,  $J = 18.2$  Hz, 2 H);  $^{13}\text{C NMR}$  ( $\text{CDCl}_3$ , 100 MHz)  $\delta$ : 162.00 (d,  $J_{\text{C-P}} = 2.6$  Hz), 141.88 (d,  $J_{\text{C-P}} = 16.3$  Hz), 138.03 (d,  $J_{\text{C-P}} = 6.6$  Hz), 134.40 (d,  $J_{\text{C-P}} = 108.8$  Hz), 131.08 (d,  $J_{\text{C-P}} = 2.6$  Hz), 130.87 (d,  $J_{\text{C-P}} = 9.4$  Hz), 130.32, 129.09 (d,  $J_{\text{C-P}} = 90.4$  Hz), 128.36 (d,  $J_{\text{C-P}} = 5.0$  Hz), 128.26 (d,  $J_{\text{C-P}} = 6.4$  Hz), 127.59, 120.55 (d,  $J_{\text{C-P}} = 103.7$  Hz); **MS (ESI)**: found  $[\text{M}+\text{H}]^+$  381.2.

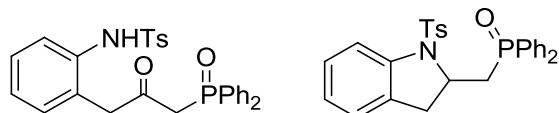

**8a:3a = 1:1**: colourless oil;  $^{31}\text{P NMR}$  ( $\text{CDCl}_3$ , 162 MHz)  $\delta$ : 29.49, 28.55;  $^1\text{H NMR}$  ( $\text{CDCl}_3$ , 400 MHz)  $\delta$ : 9.56 (s, 1 H), 7.97-8.01 (m, 2 H), 7.43-7.77 (m, 23 H), 7.00-7.24 (m, 11 H), 4.28-4.35 (m, 1 H), 3.53 (s, 2 H), 3.48 (d,  $J_{\text{H-P}} = 14.2$  Hz, 2 H), 3.18-3.25 (m, 2 H), 2.89-2.96 (m, 1 H), 2.65-2.75 (m, 1 H), 2.36 (s, 3 H), 2.30 (s, 3 H); **MS (ESI)**: found  $[\text{M}+\text{H}]^+$  488.1, 504.1.

## IX. References:

1. Correa, A.; Tellitu, I.; Dom ínguez, E.; SanMartin, R. *J. Org. Chem.* **2006**, *71*, 8316.
2. Sherman, E. S.; Fuller, P. H.; Kasi, D.; Chemler, S. R. *J. Org. Chem.* **2007**, *72*, 3896.
3. Berry, M. B.; Craig, D. *Synlett* **1992**, 41.

## X. NMR Charts

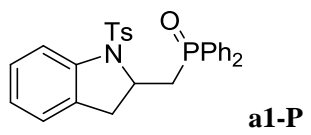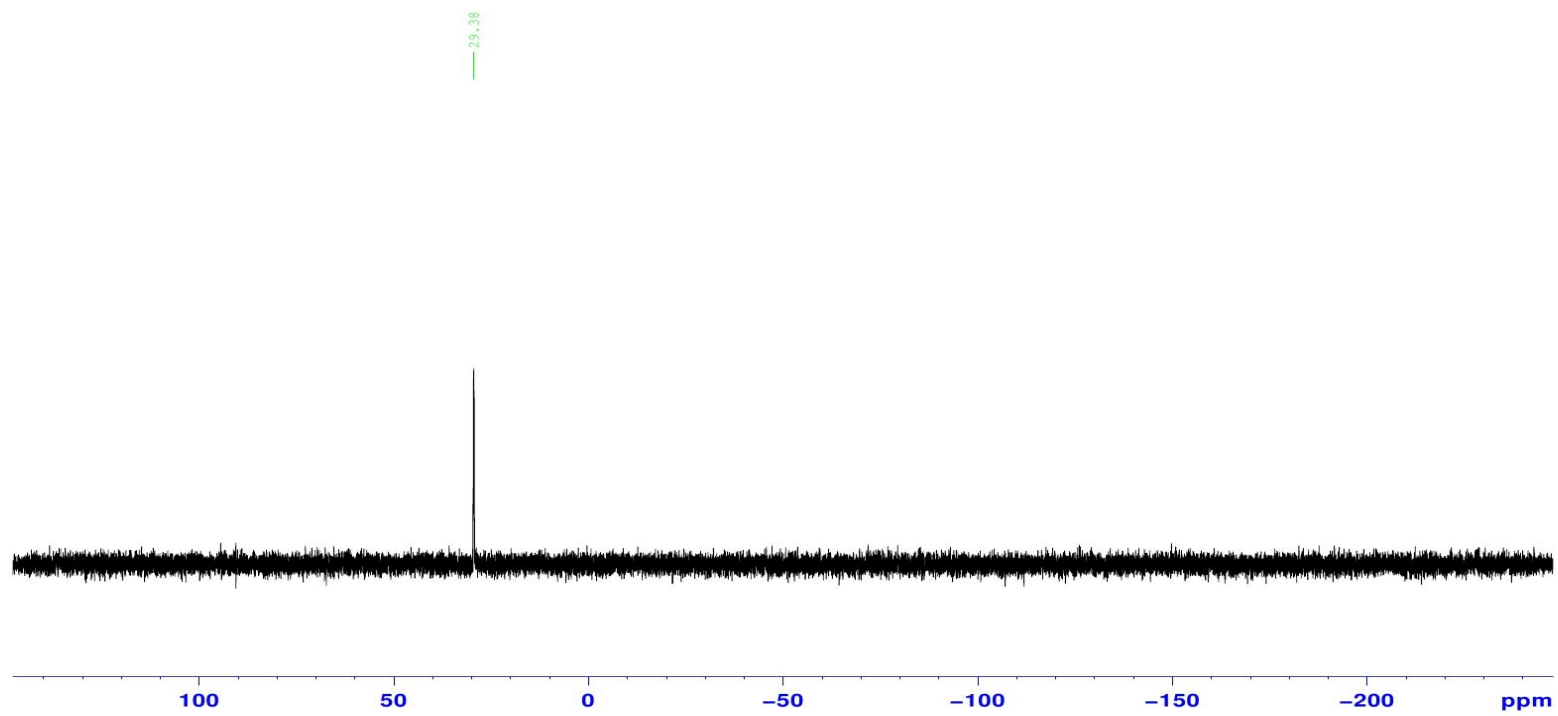

a1-H

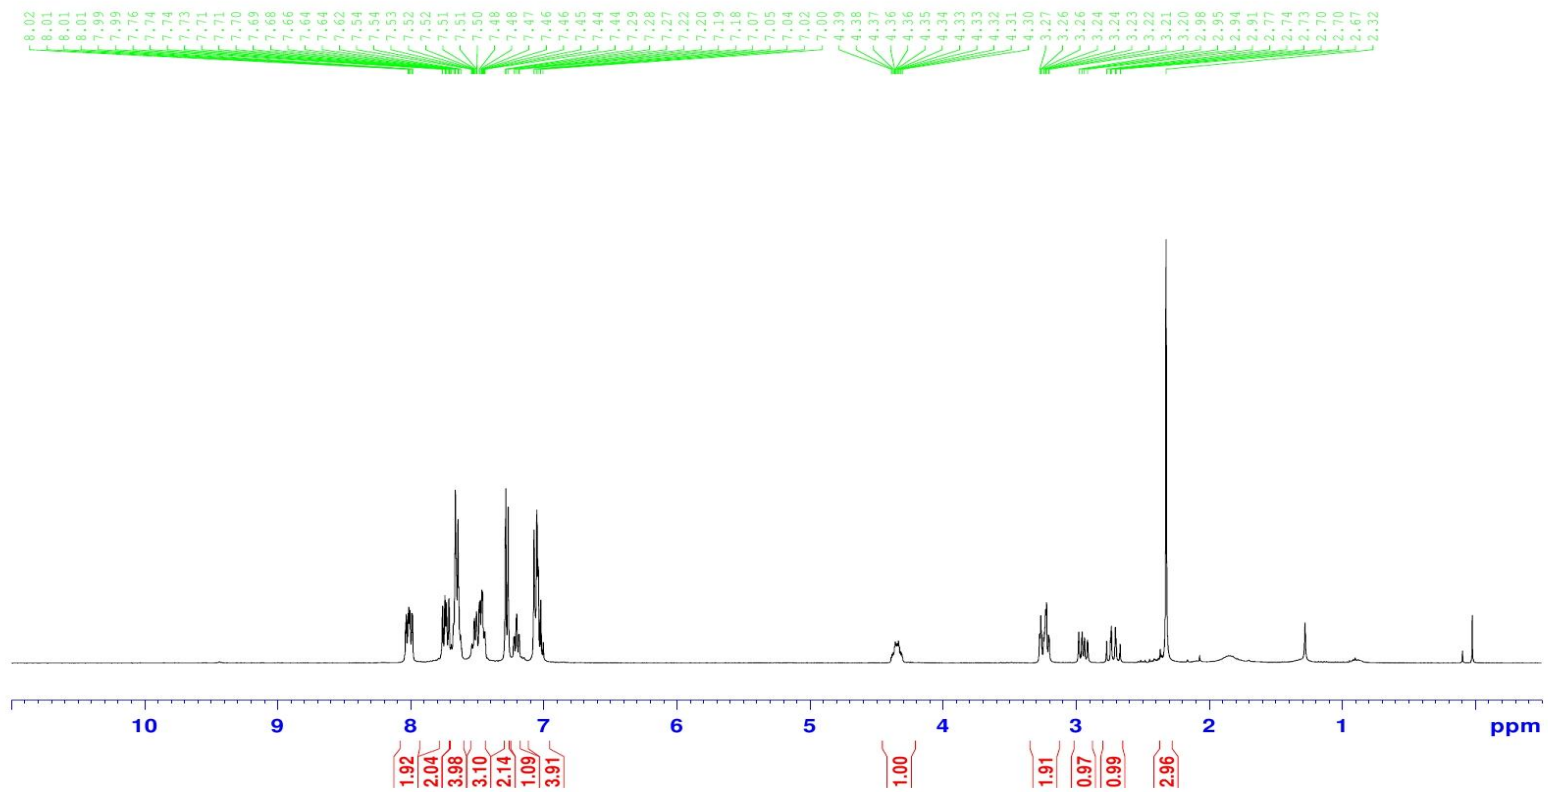

a1-C

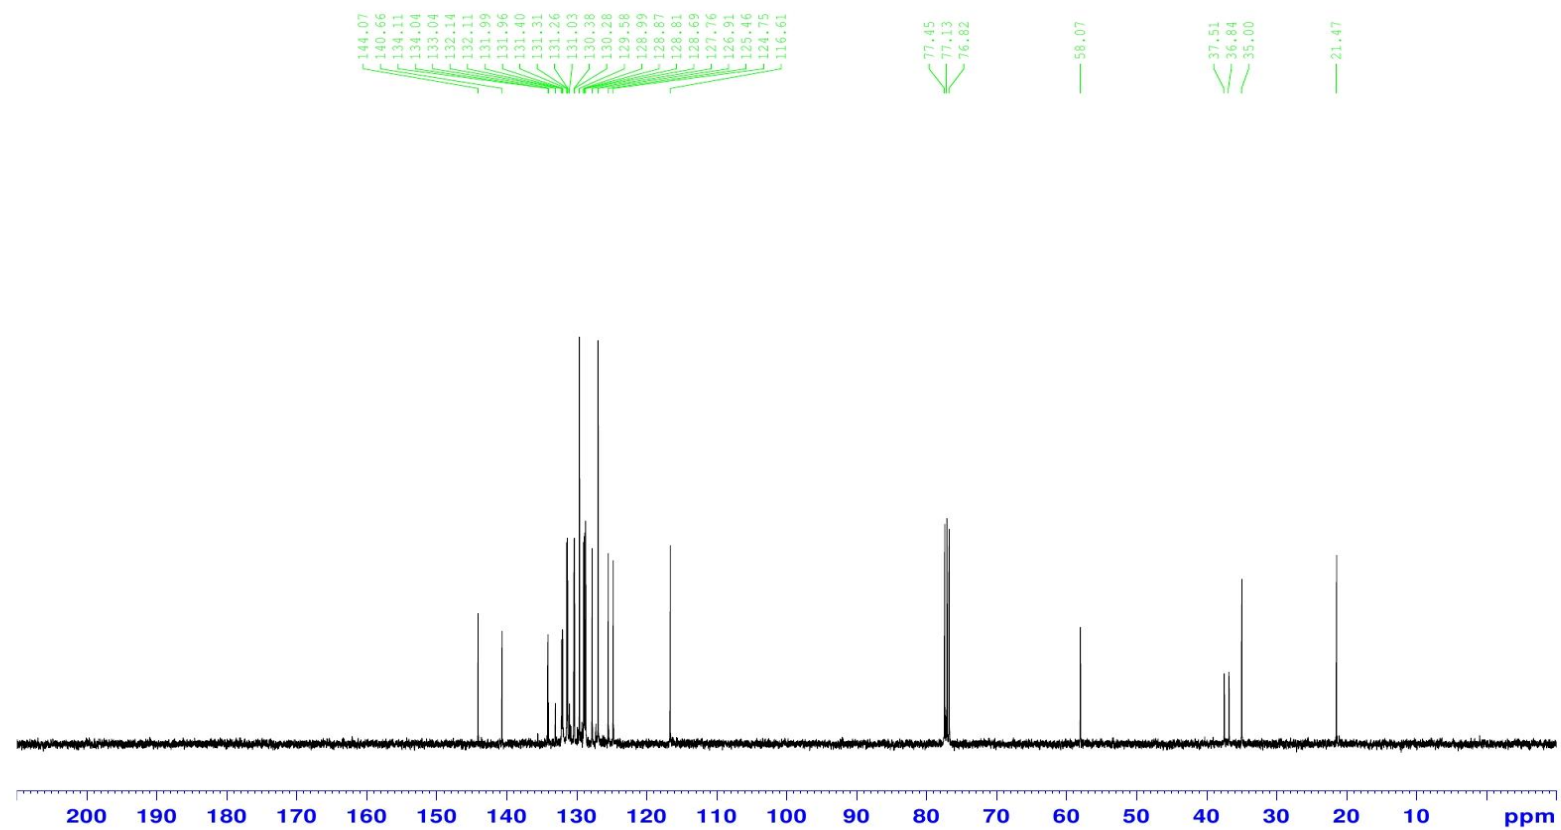

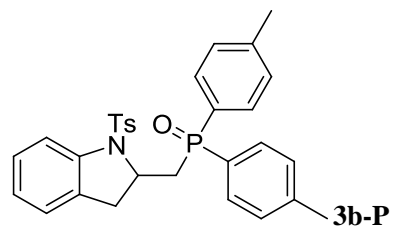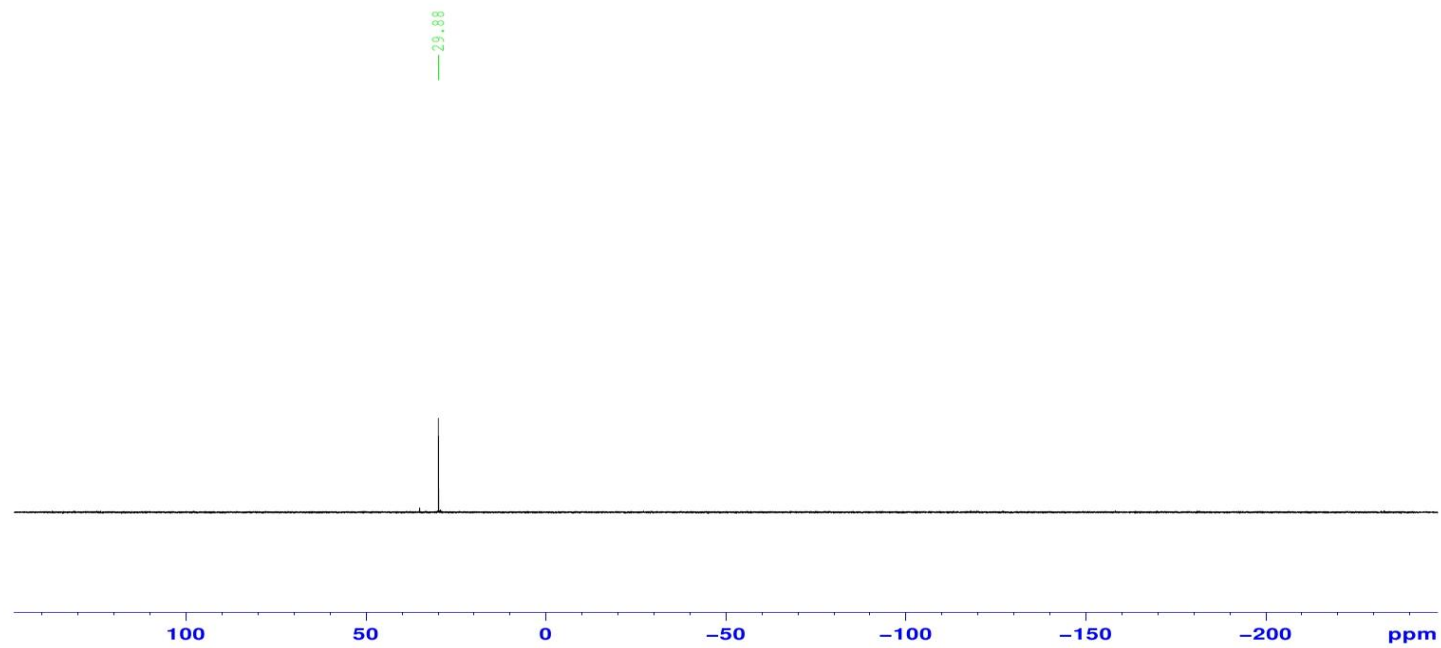

3b-H

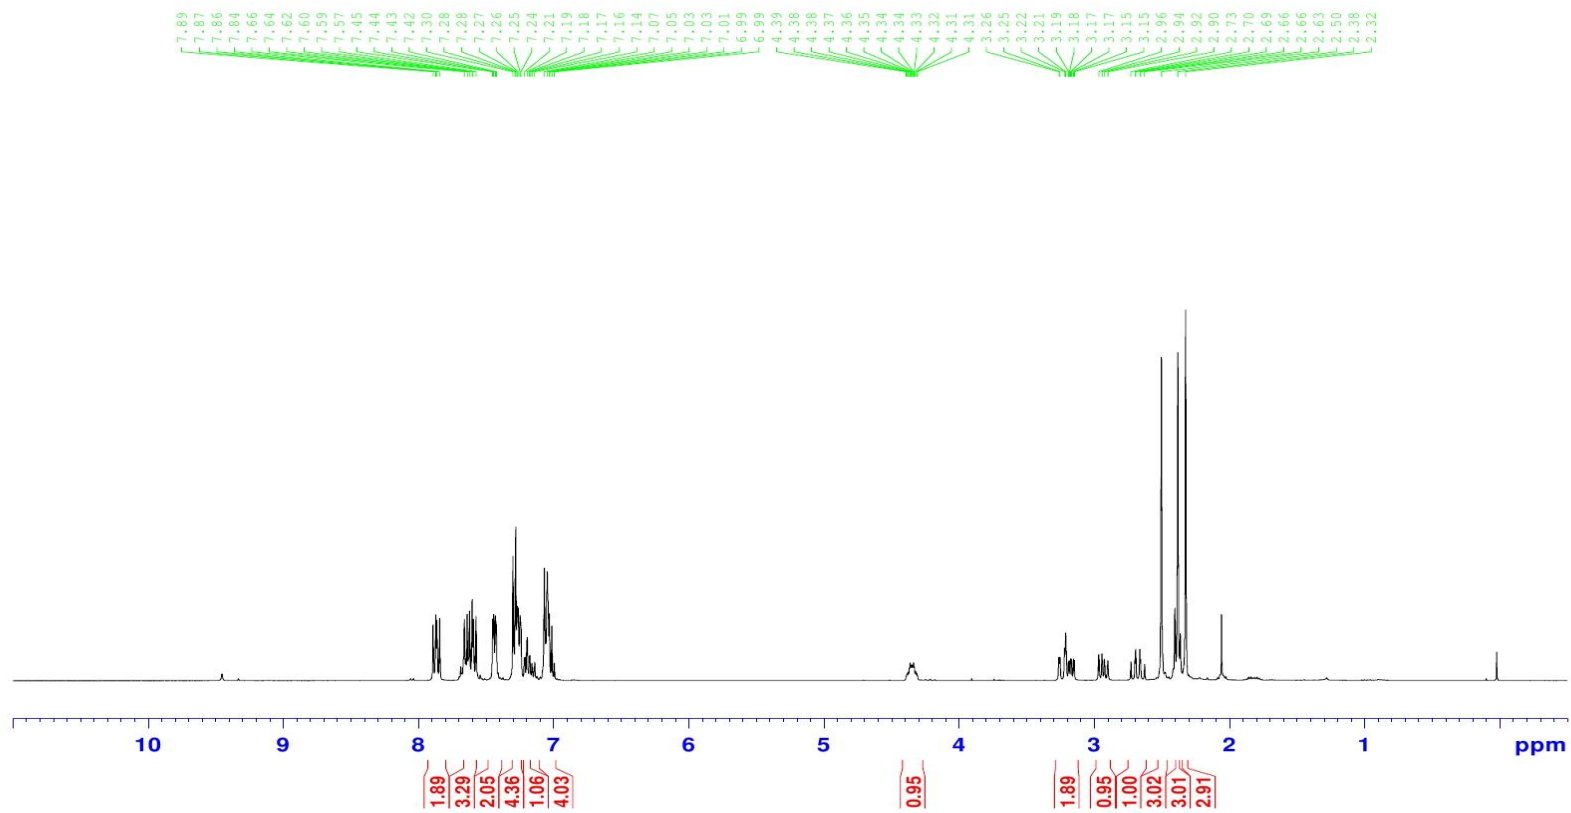

3b-C

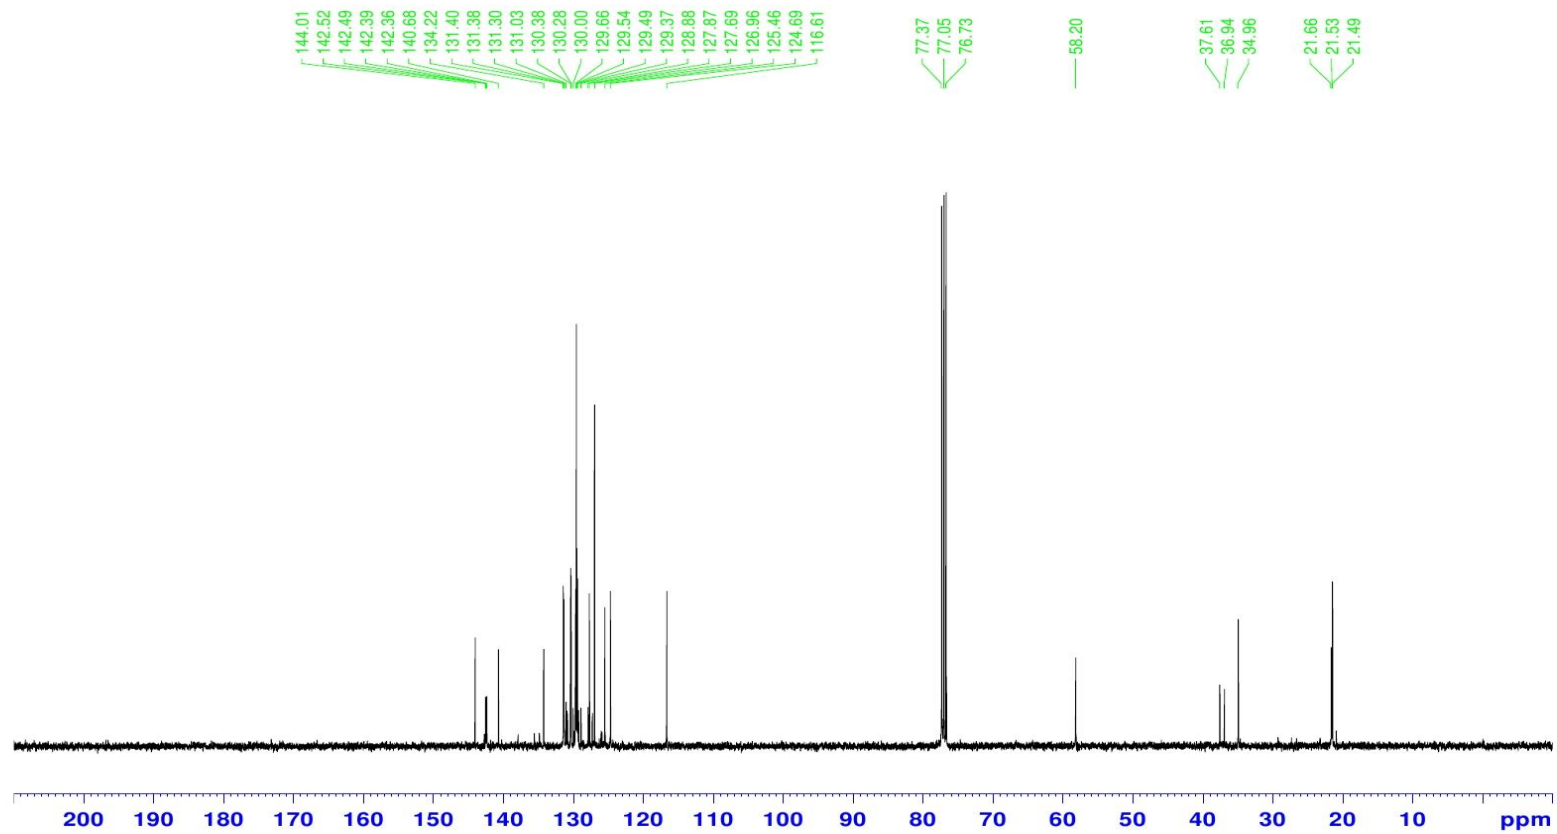

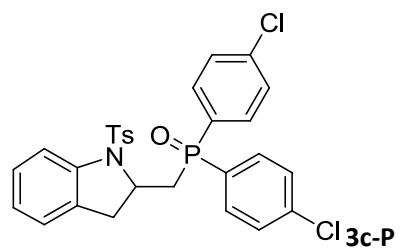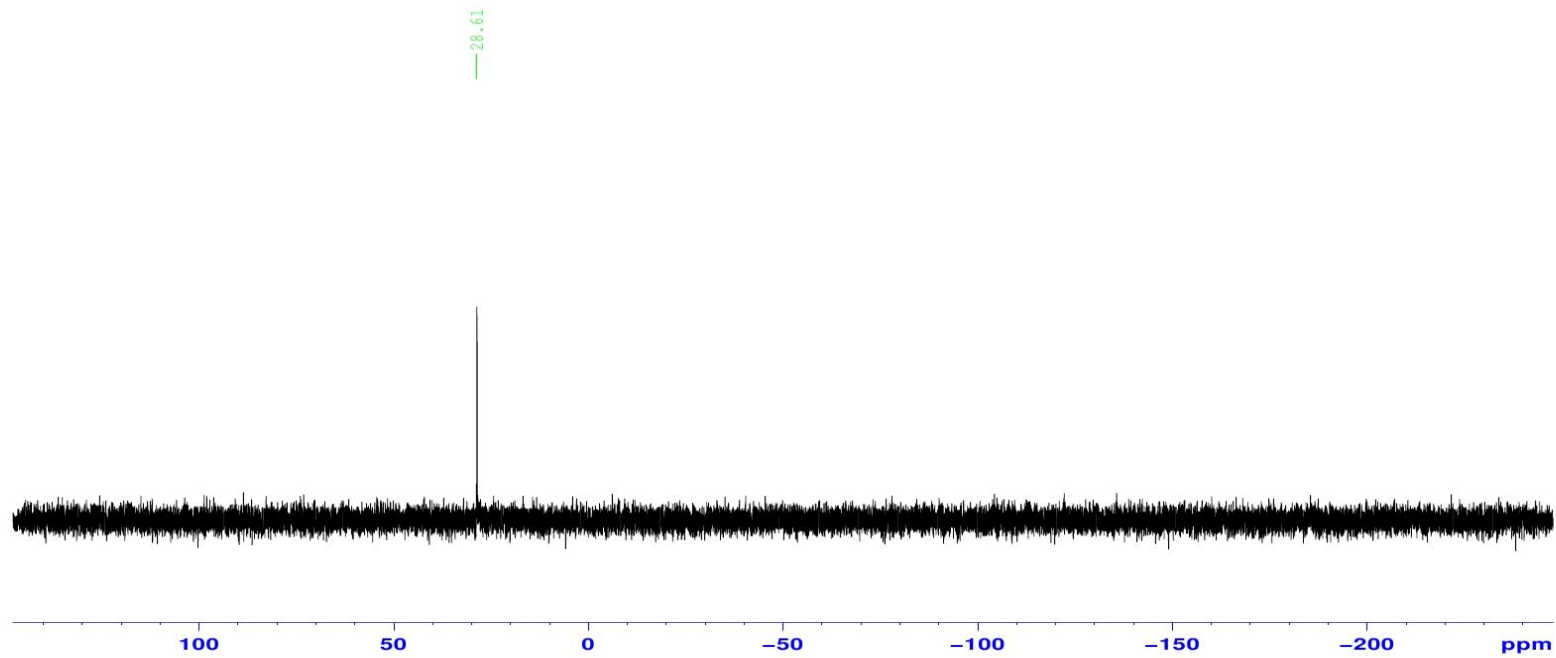



3c-H

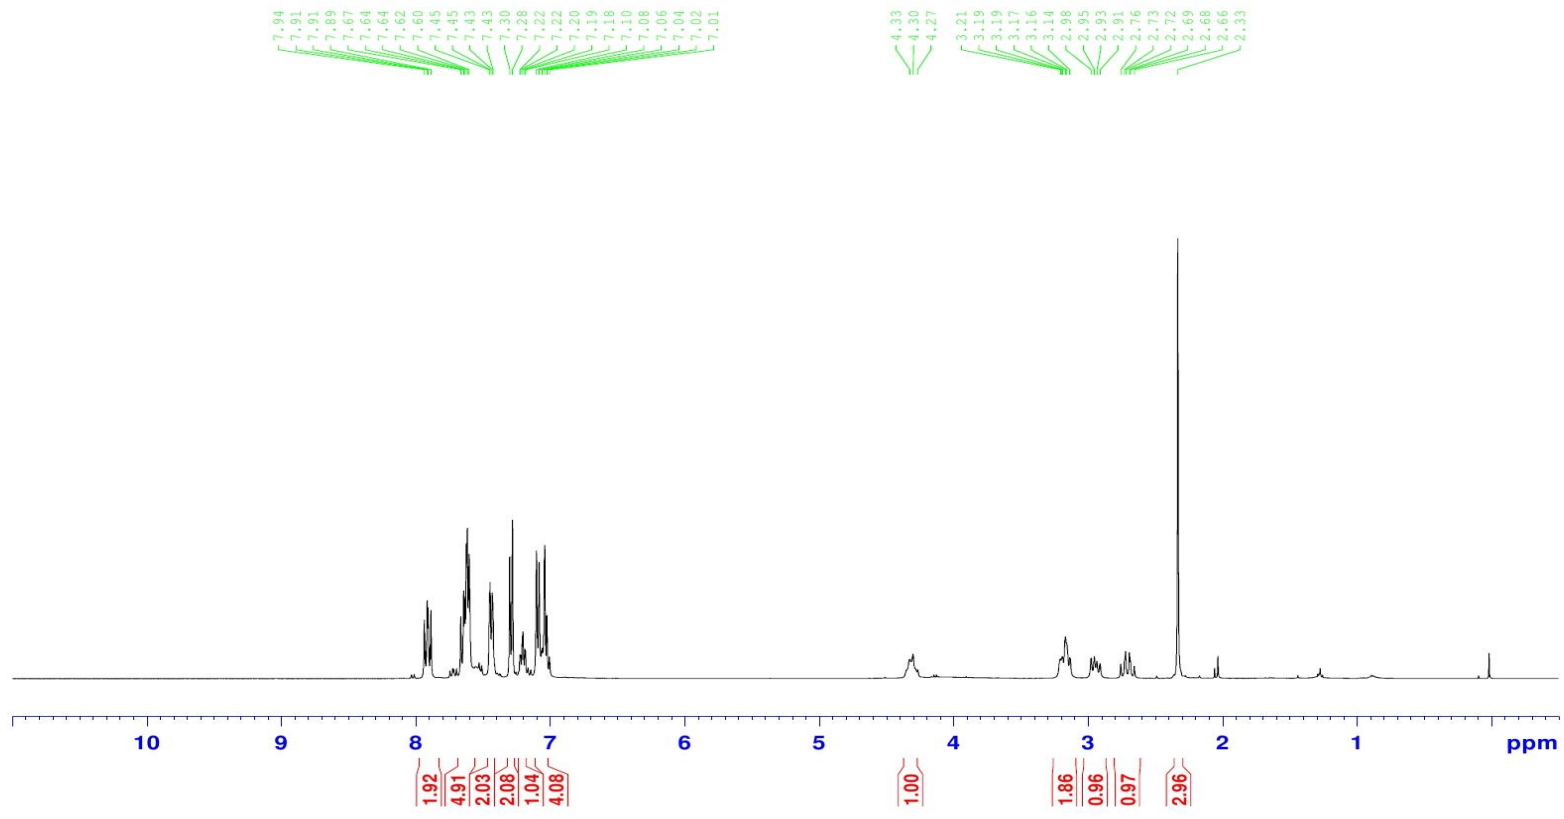

3c-C

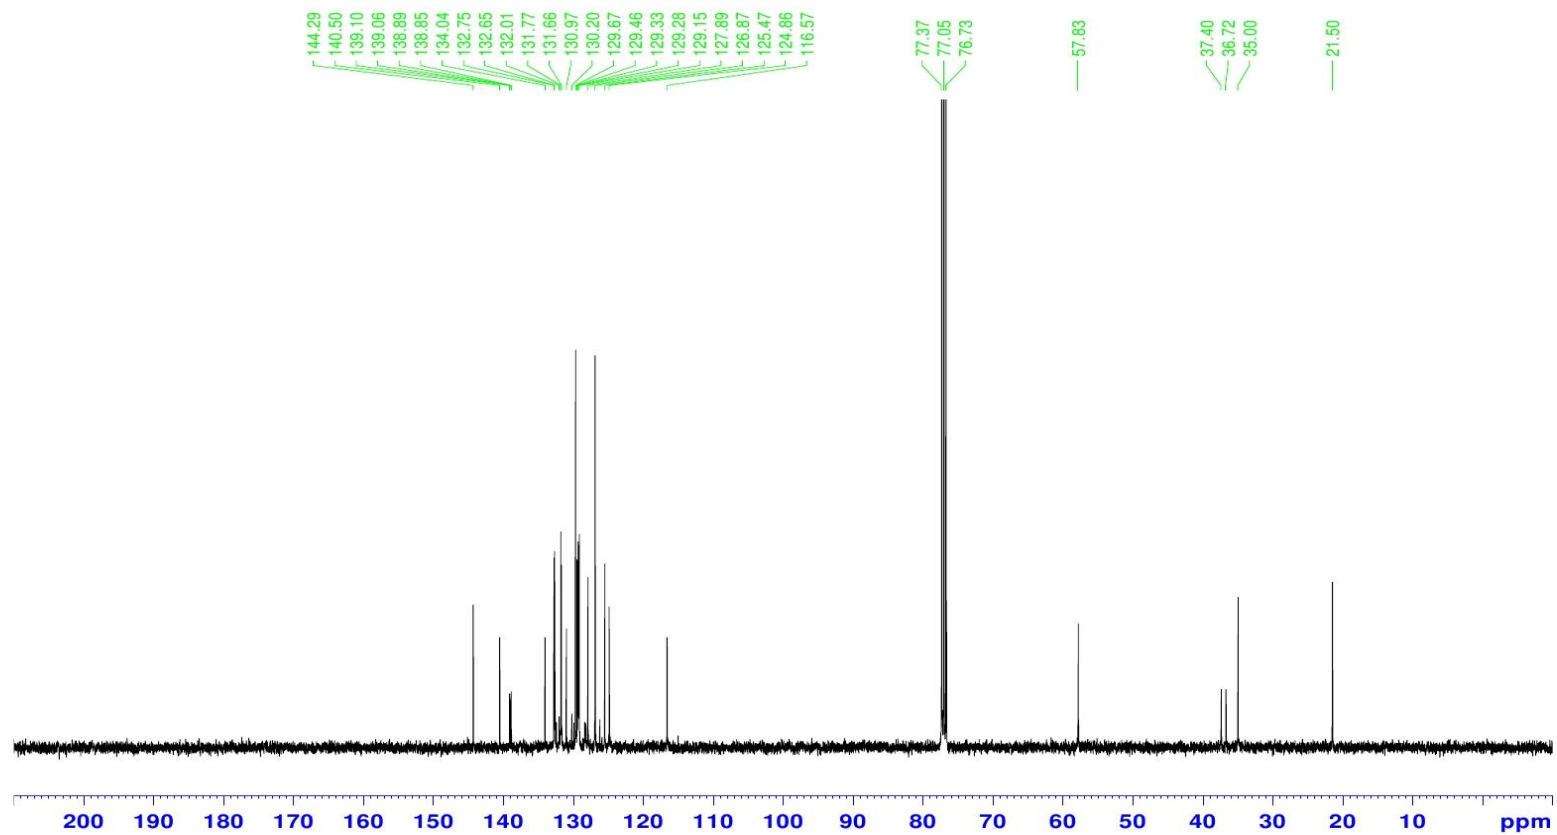

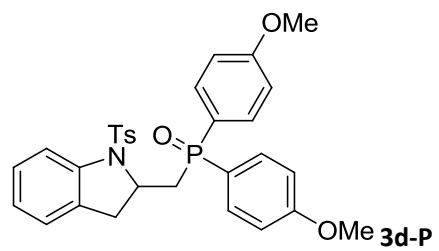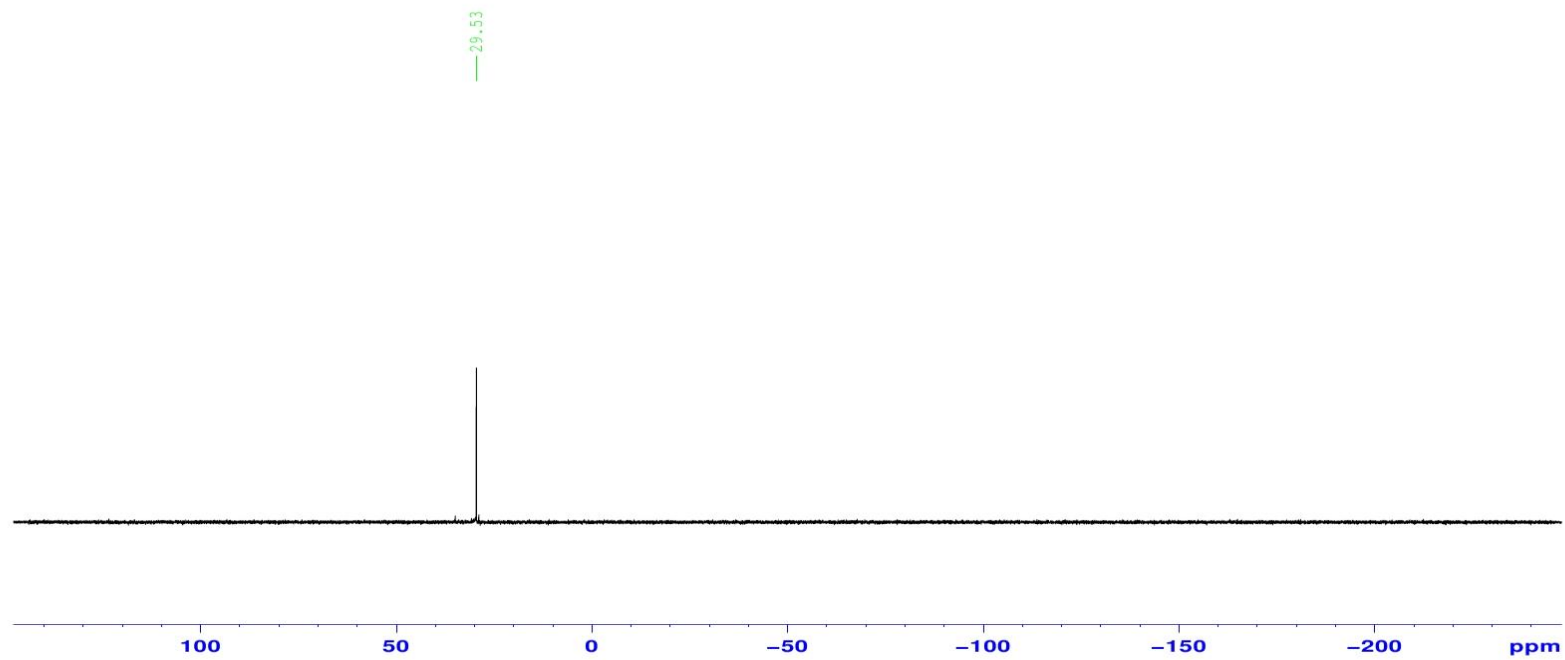

3d-H

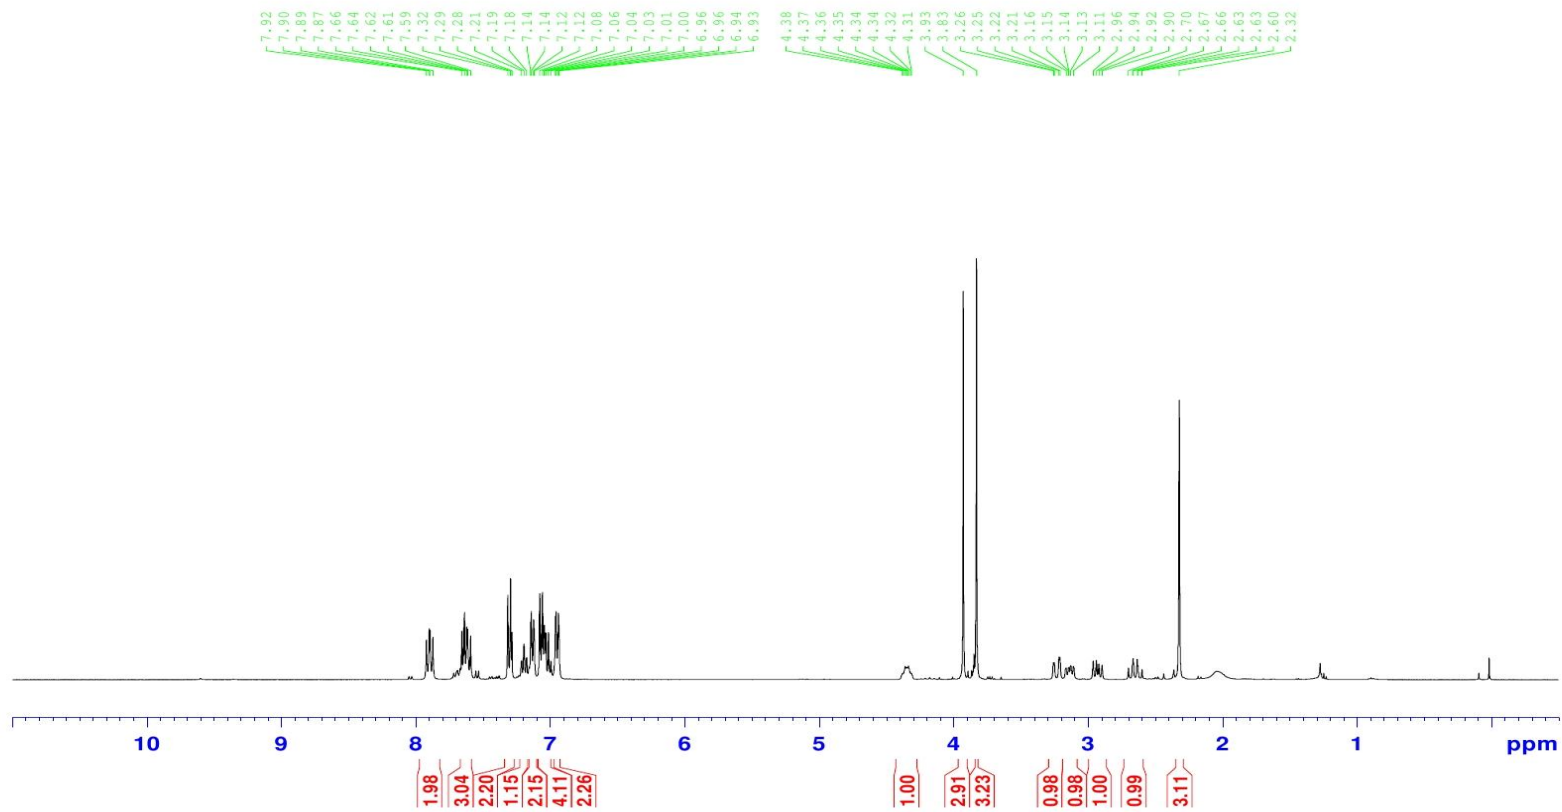

3d-C

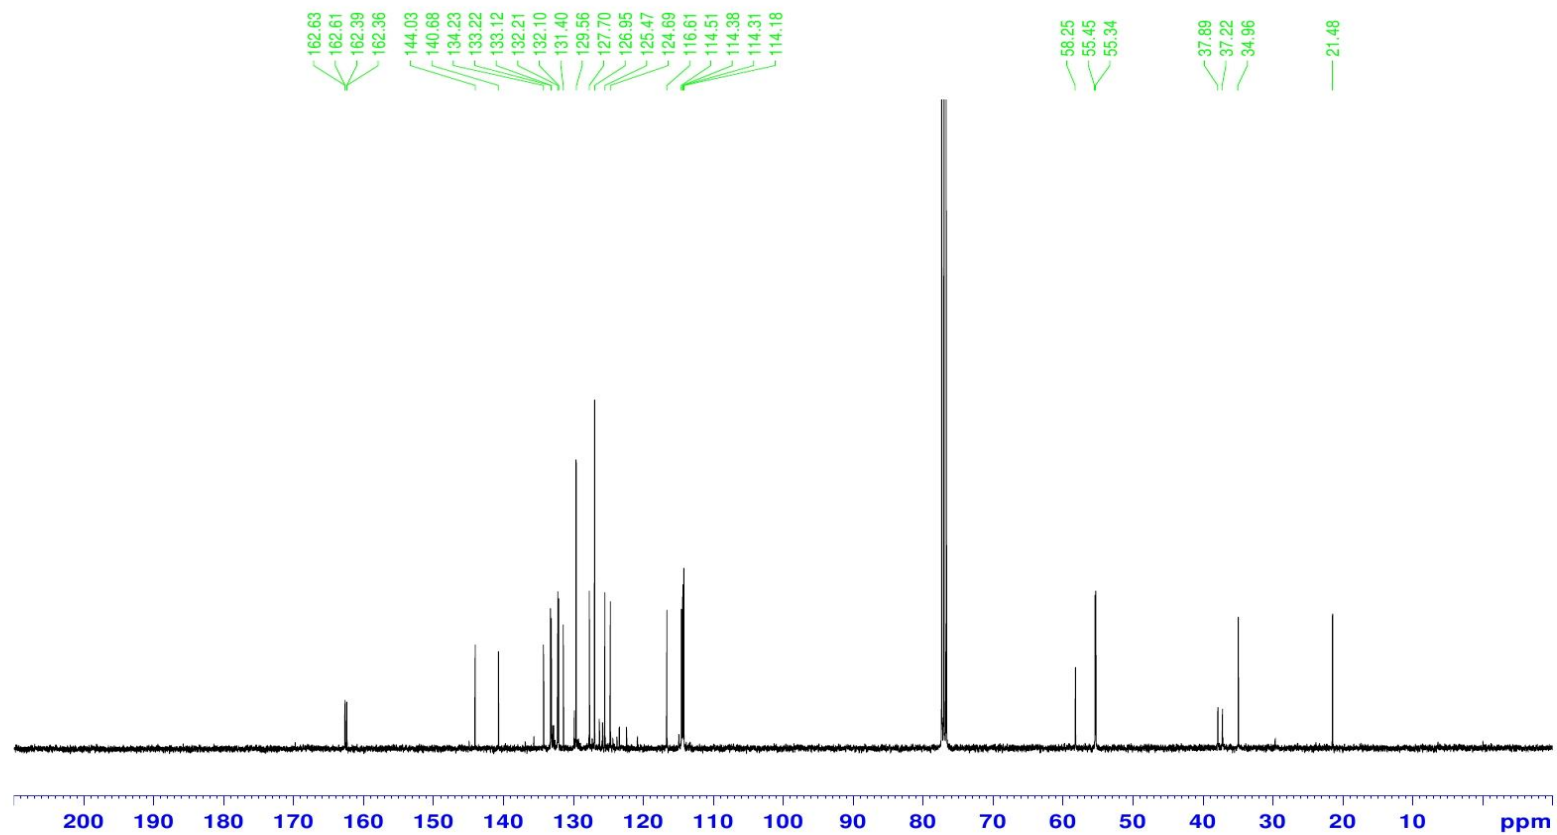

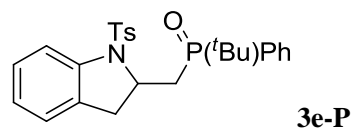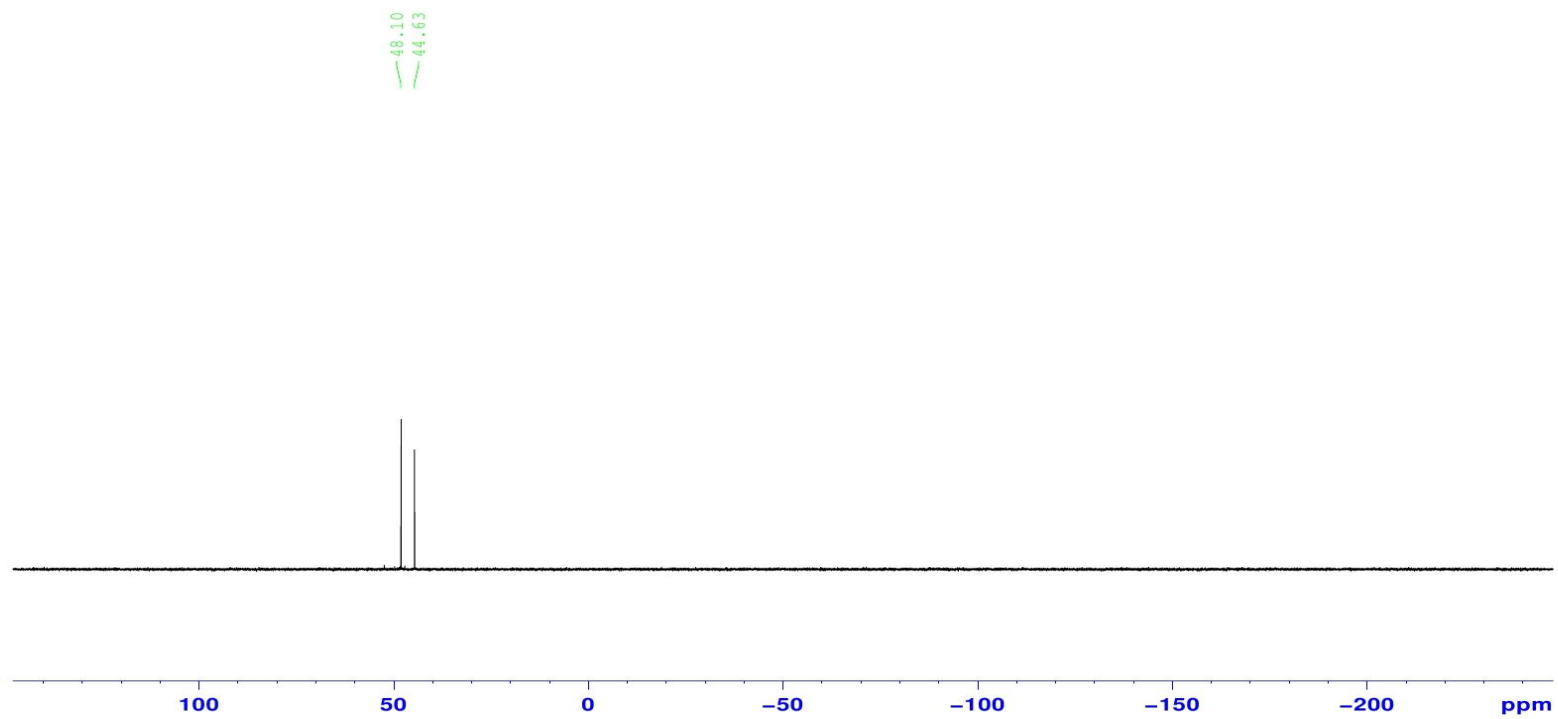

3e-H

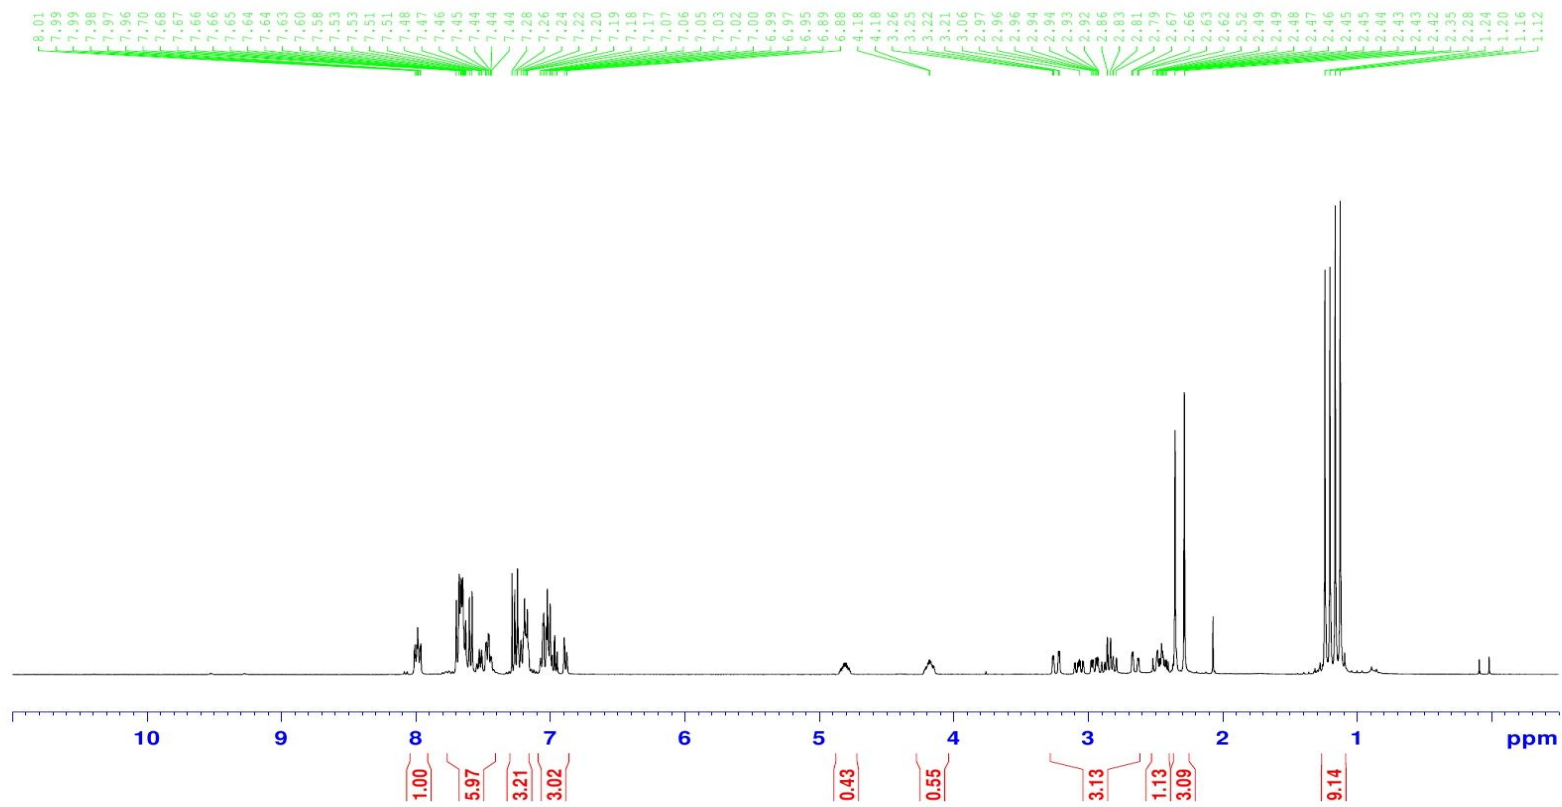

3e-C

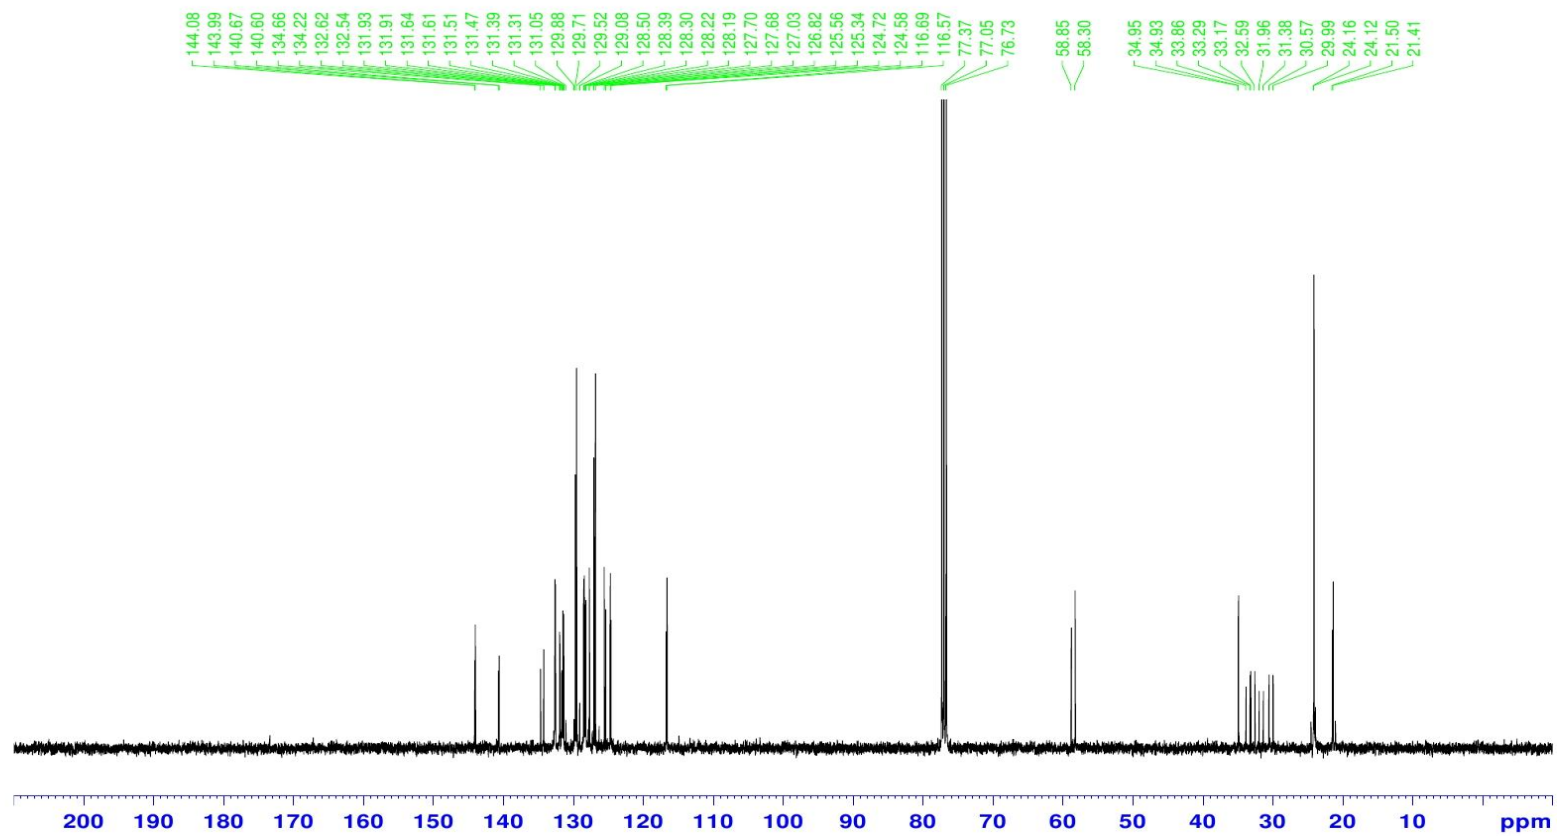



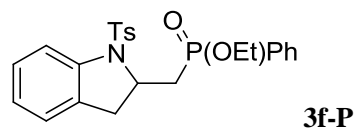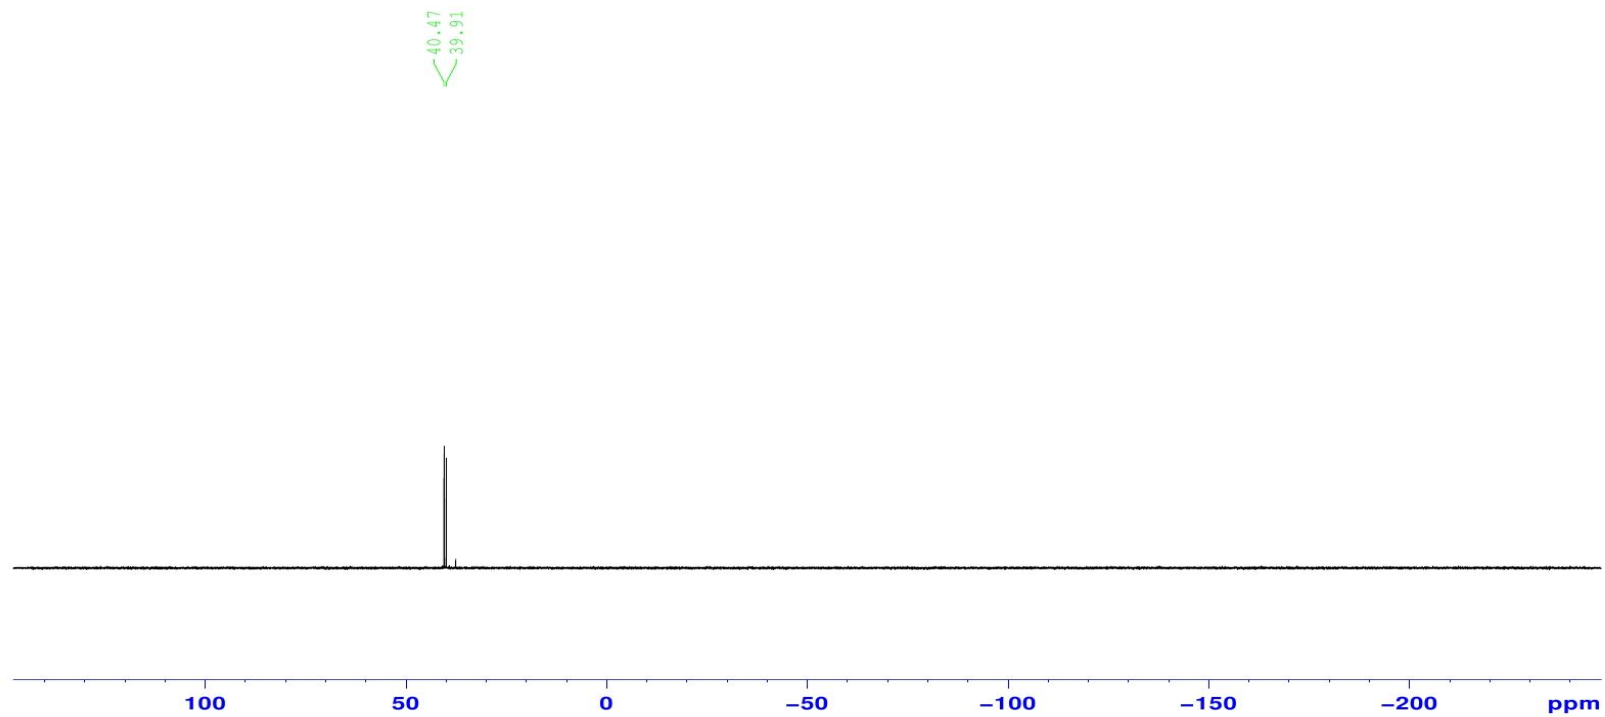

3f-H

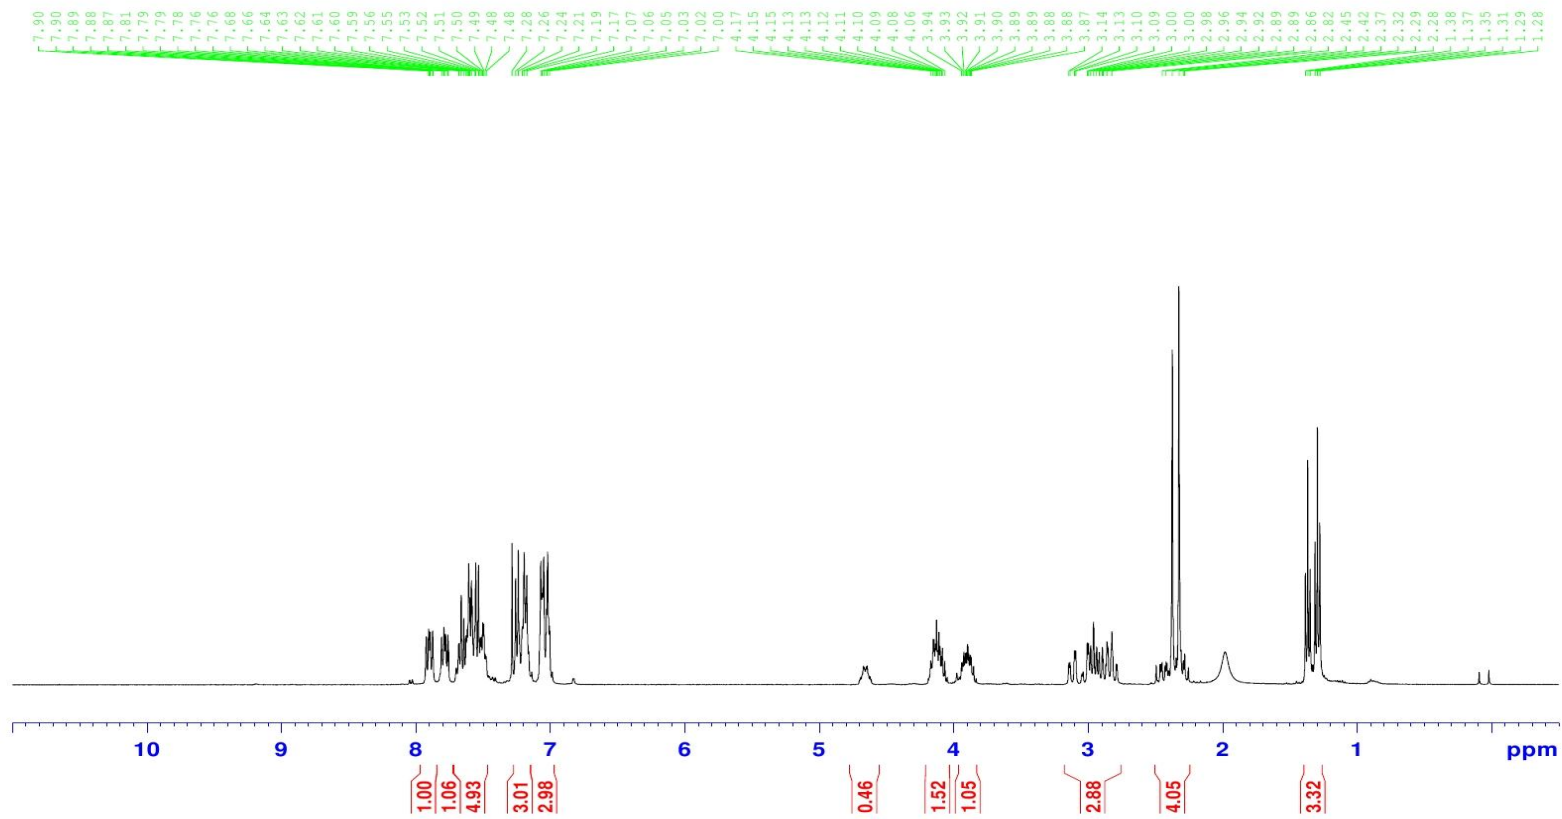

3f-C

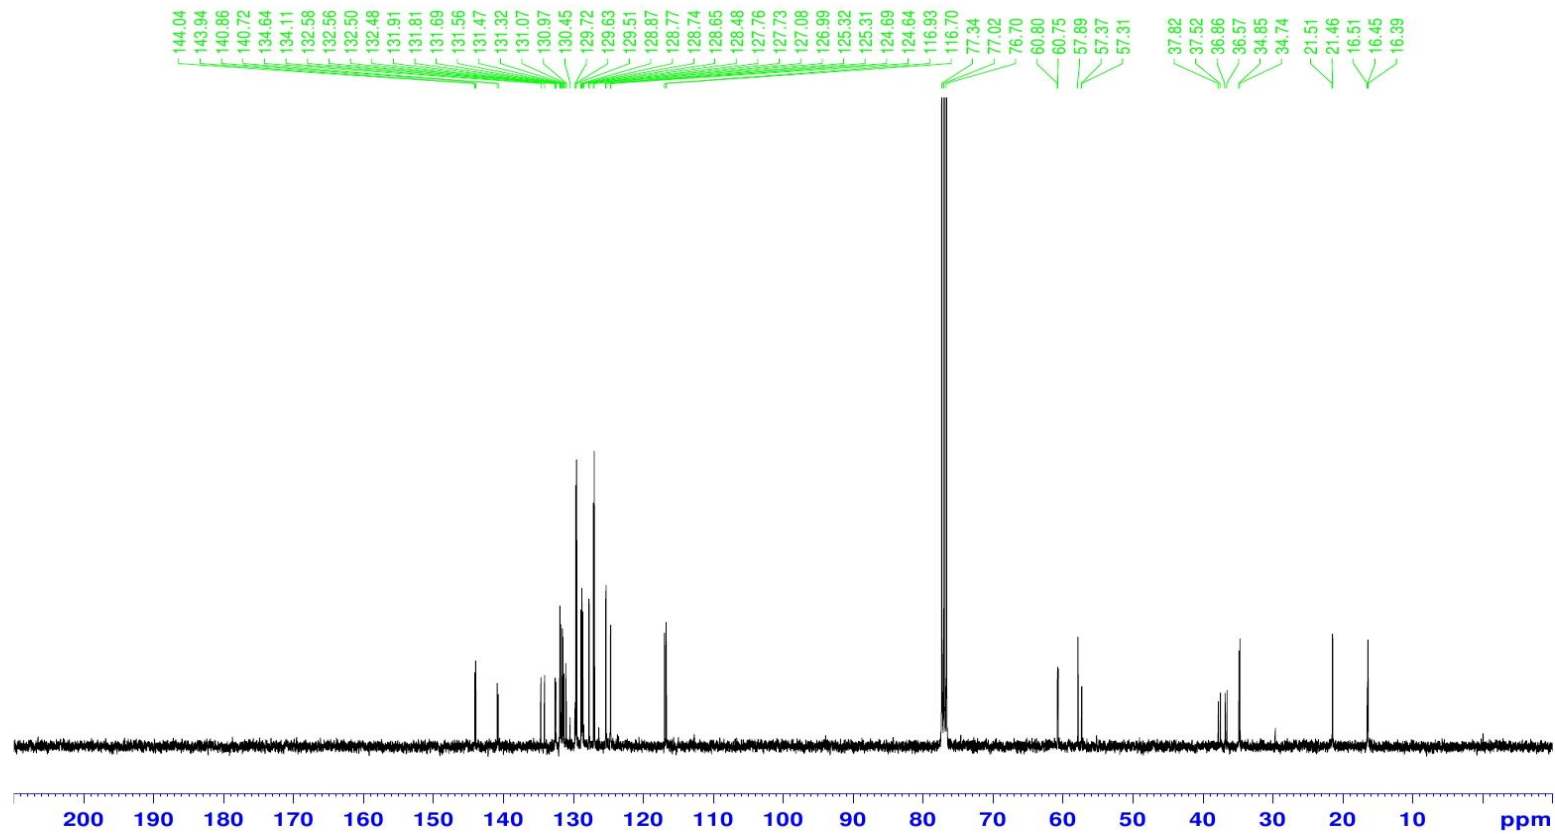

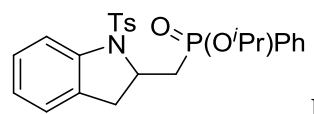

**P3g-P**

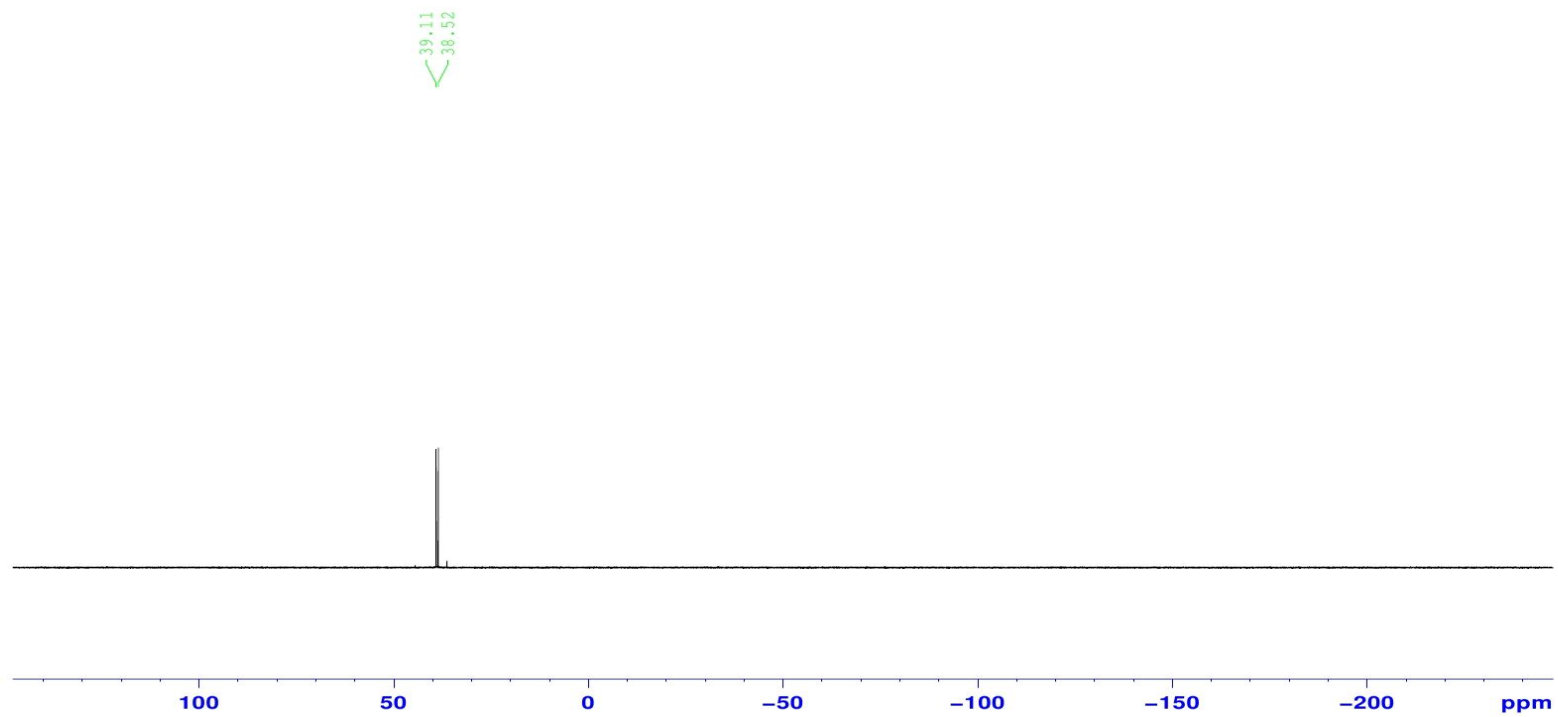

**P3g-H**

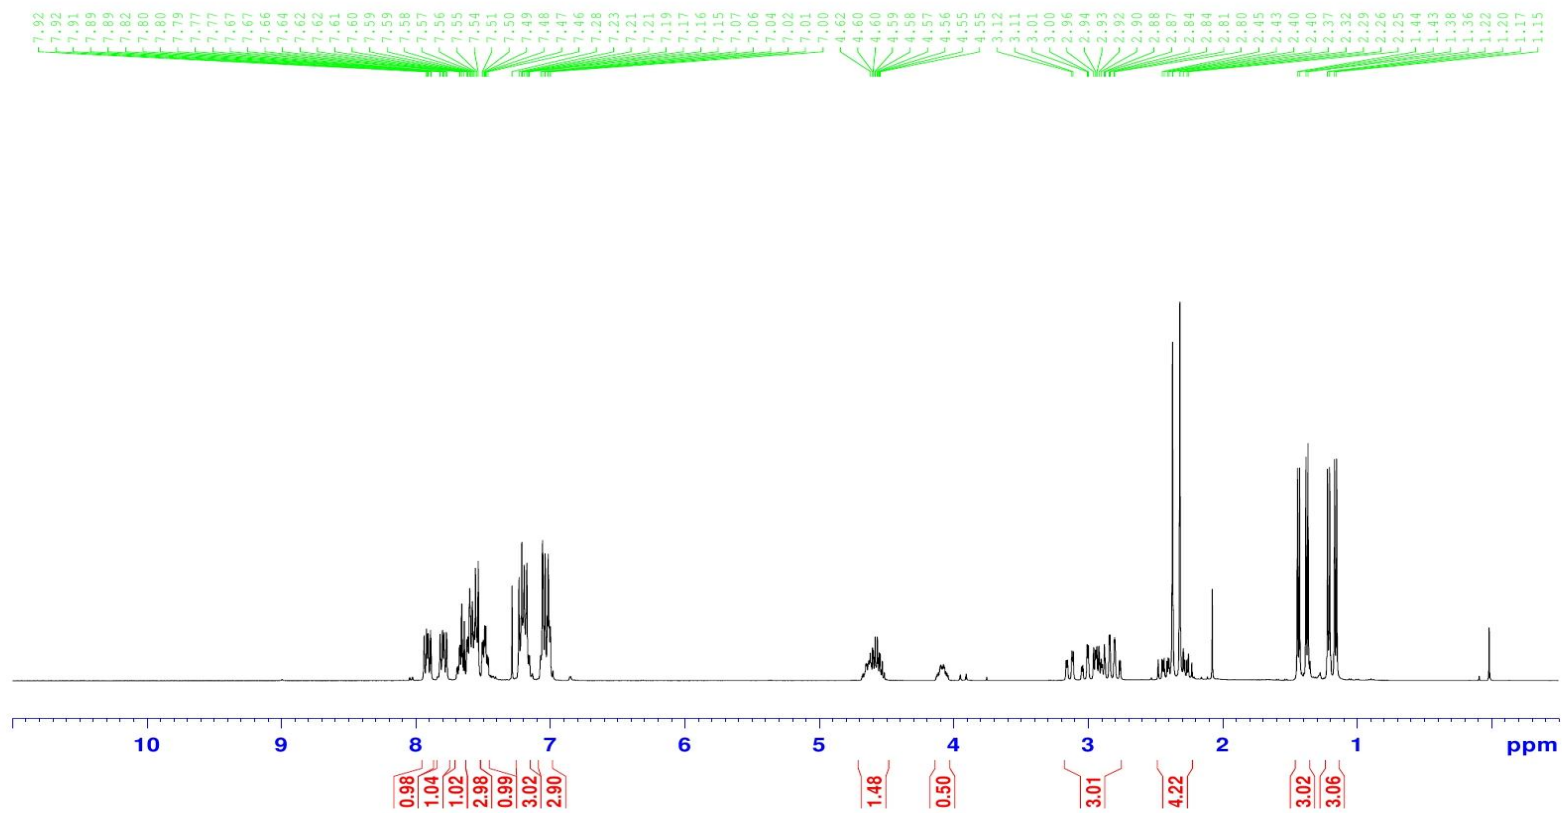

P3g-C

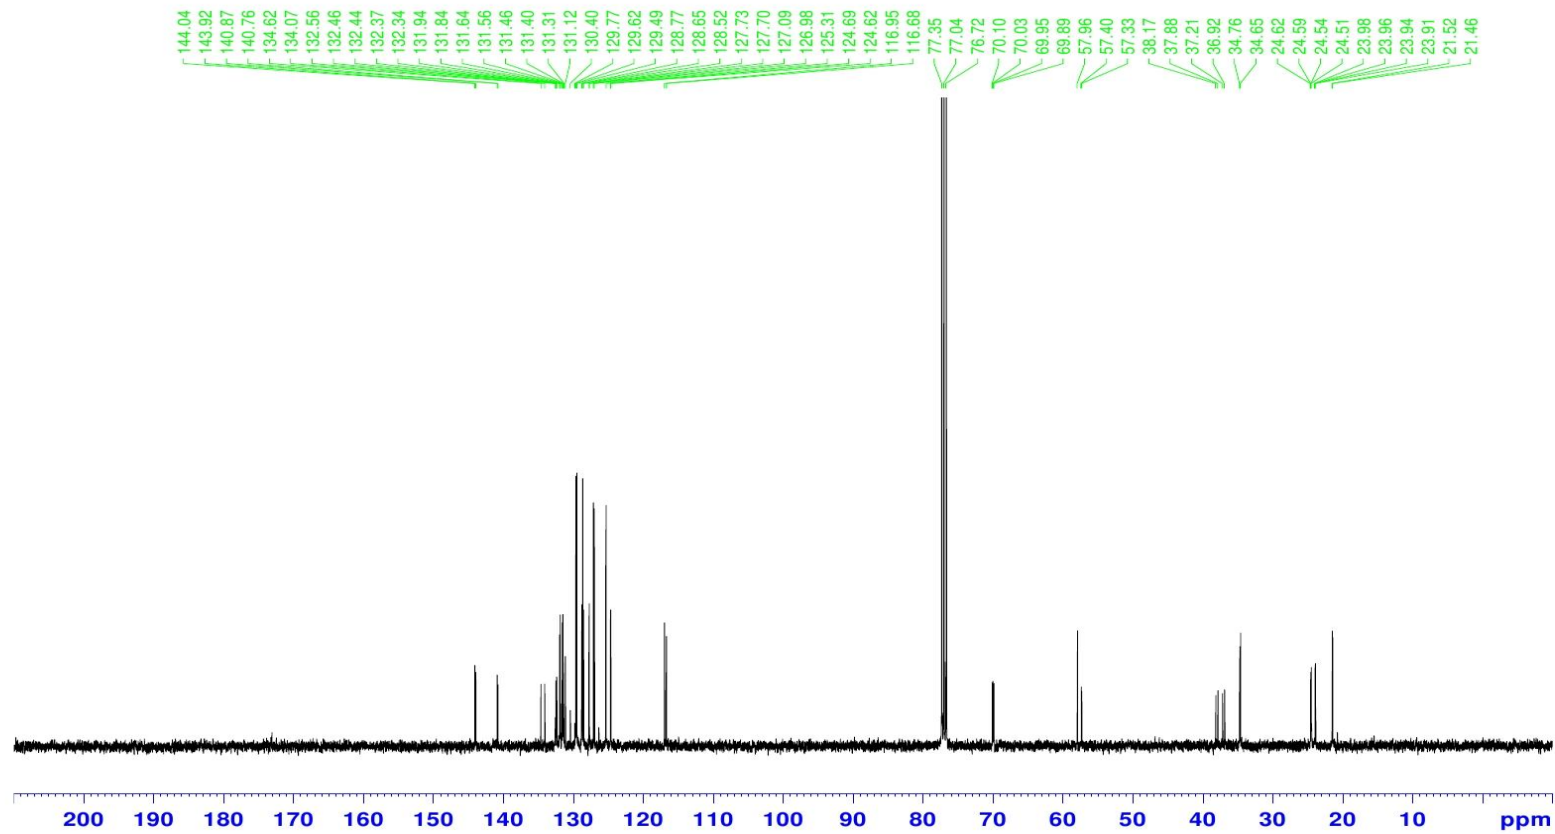

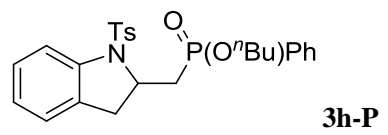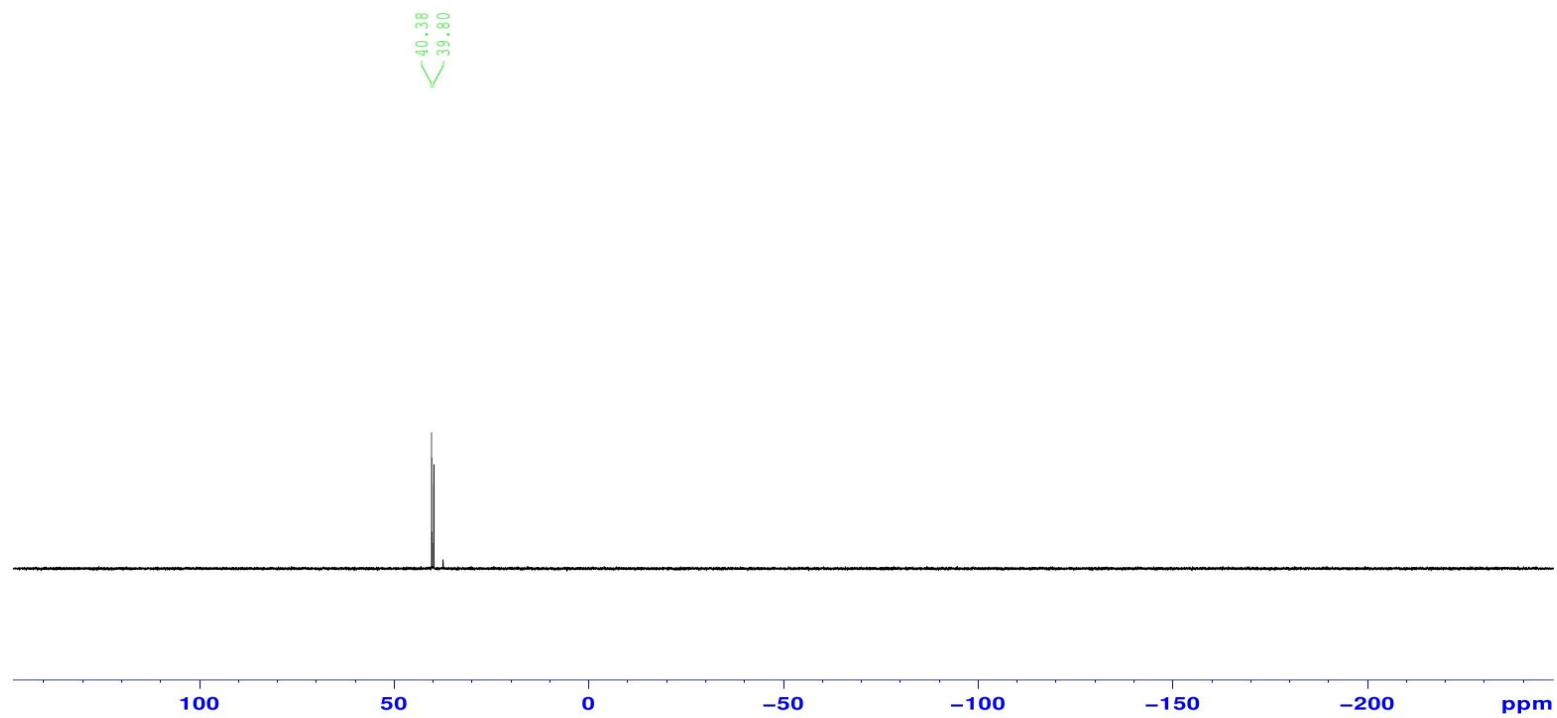

3h-H

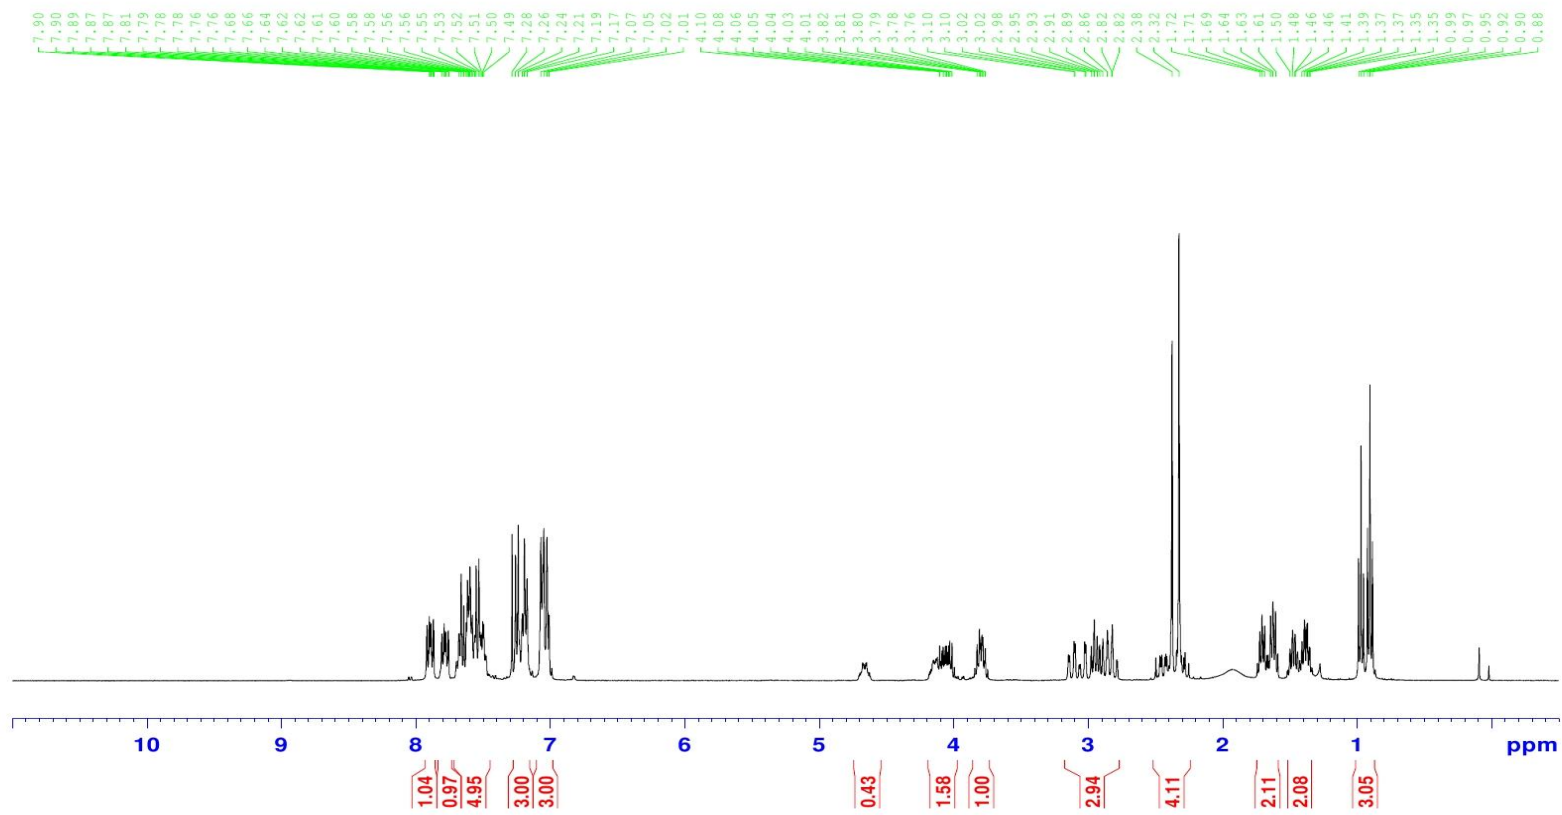



3h-C

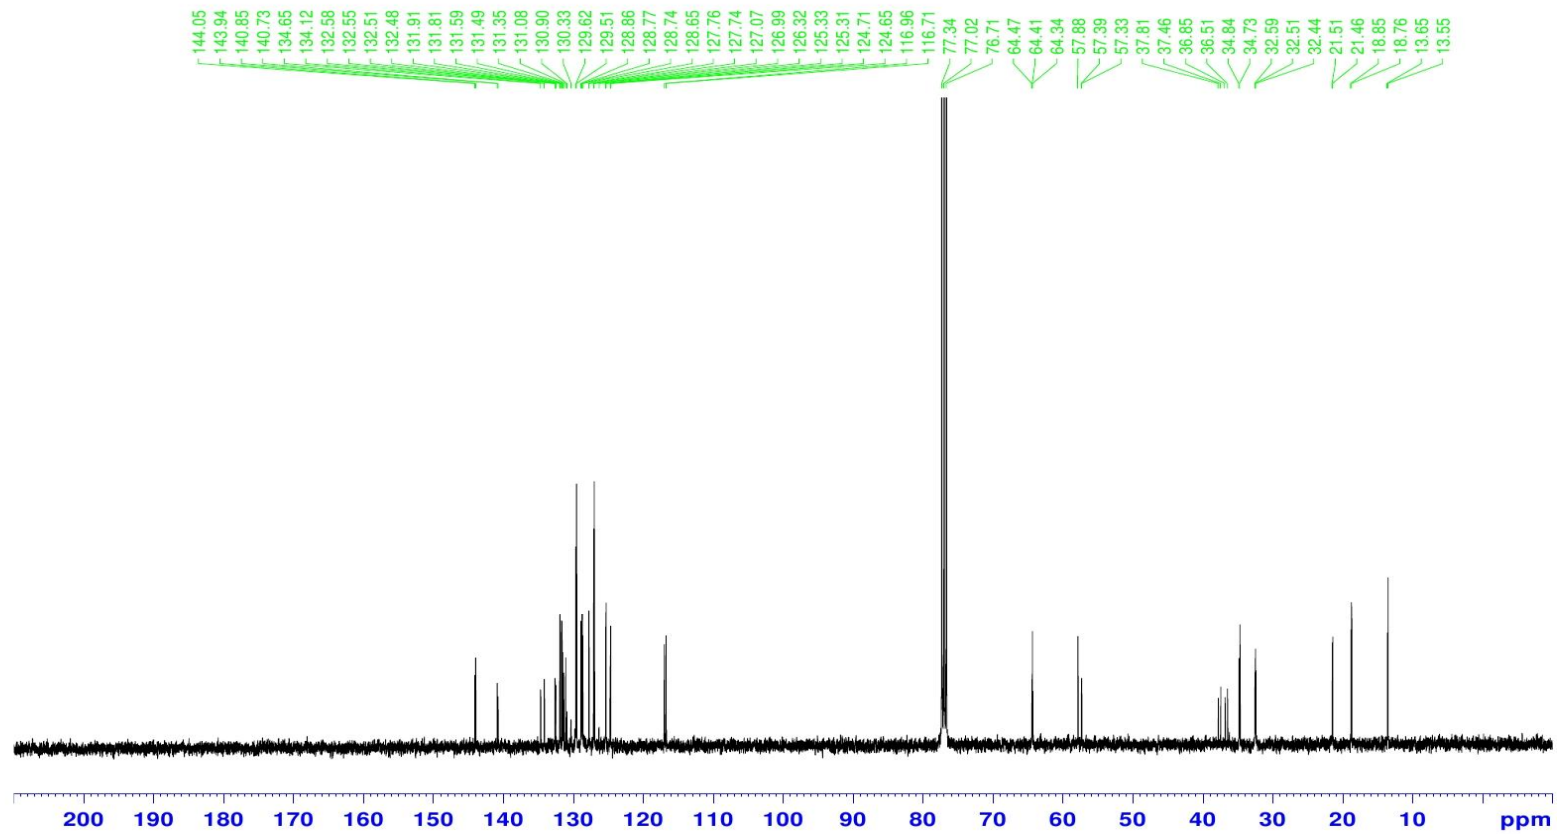

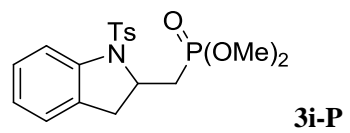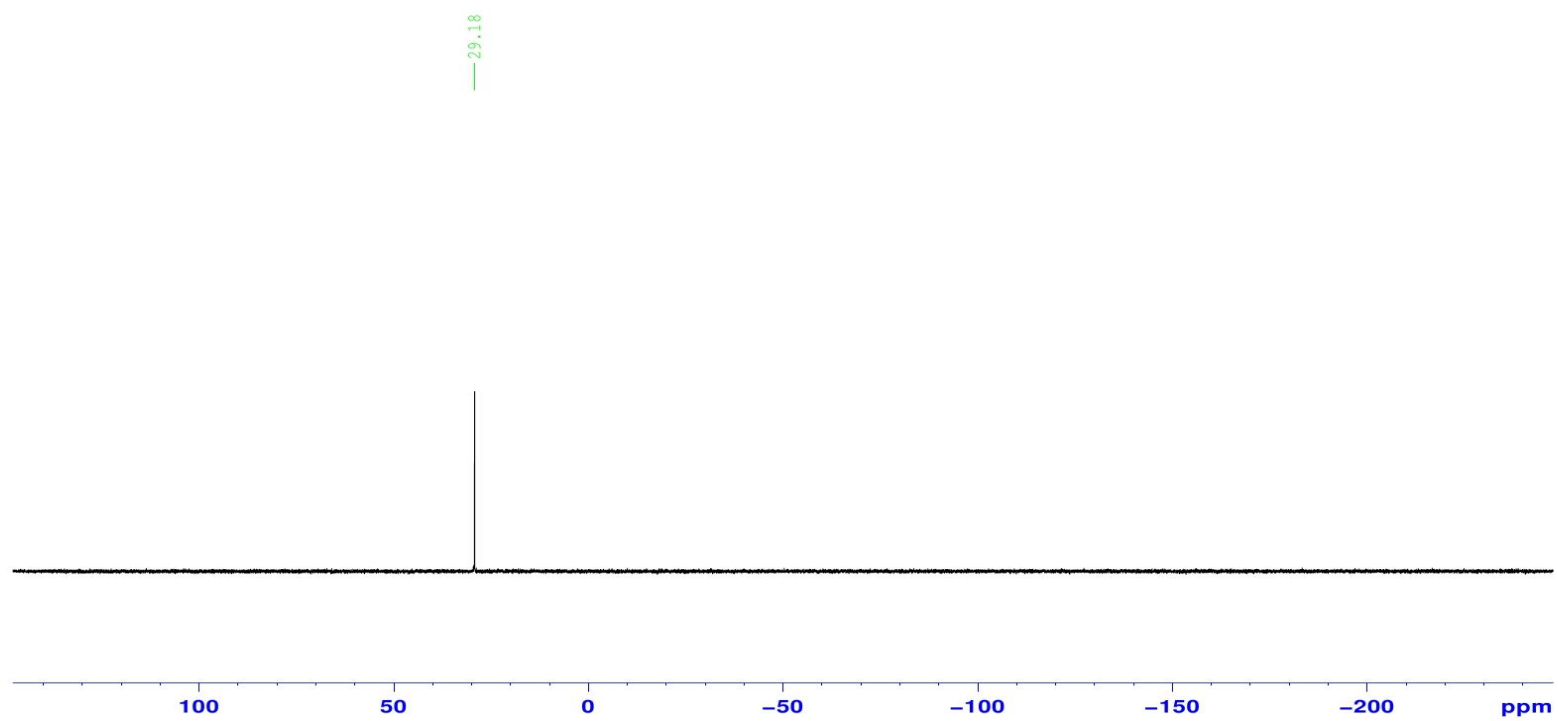

3i-H

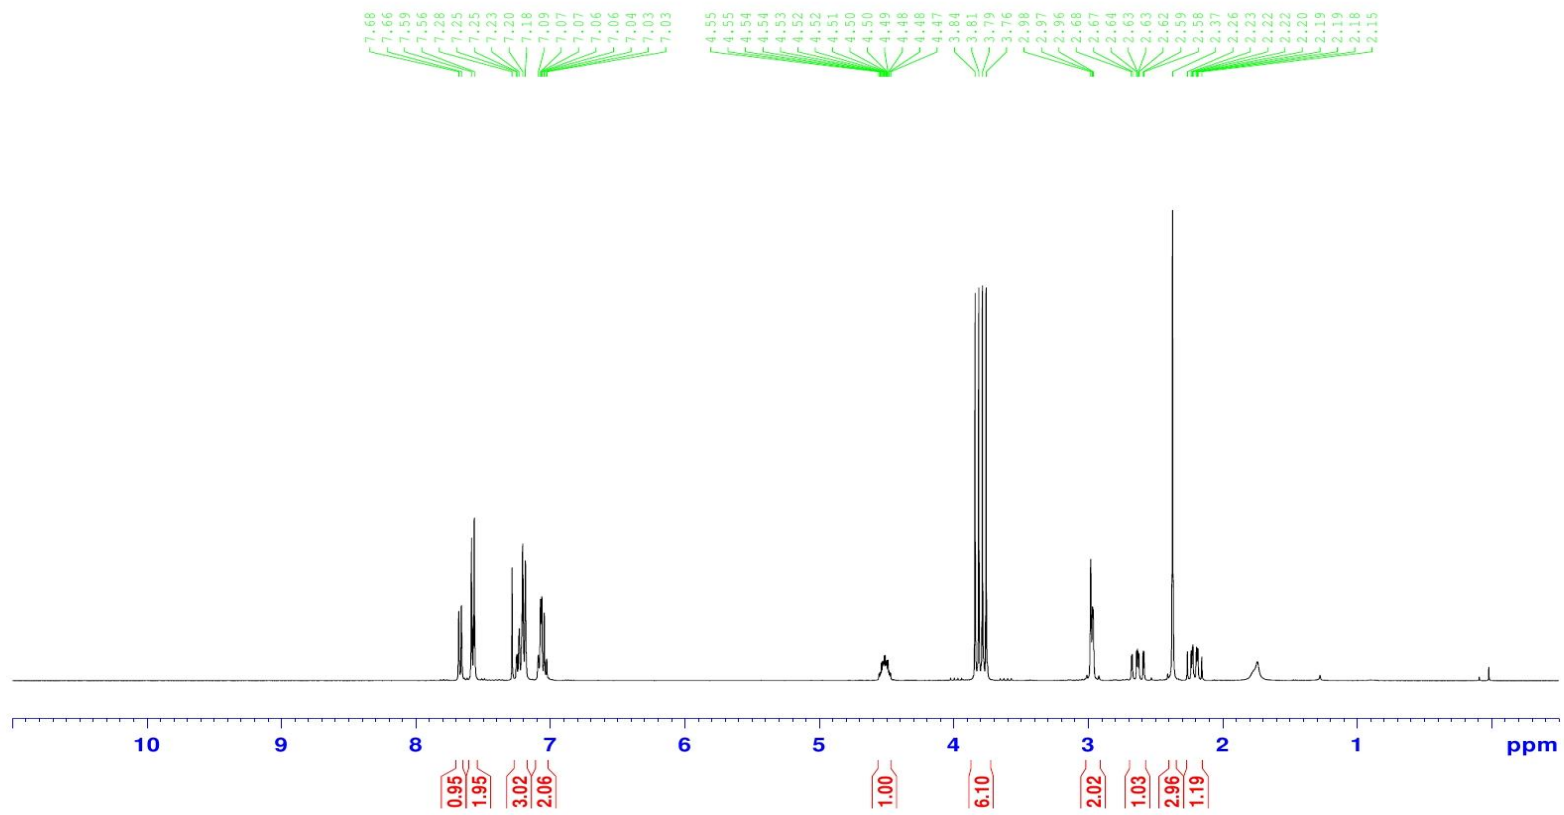

3i-C

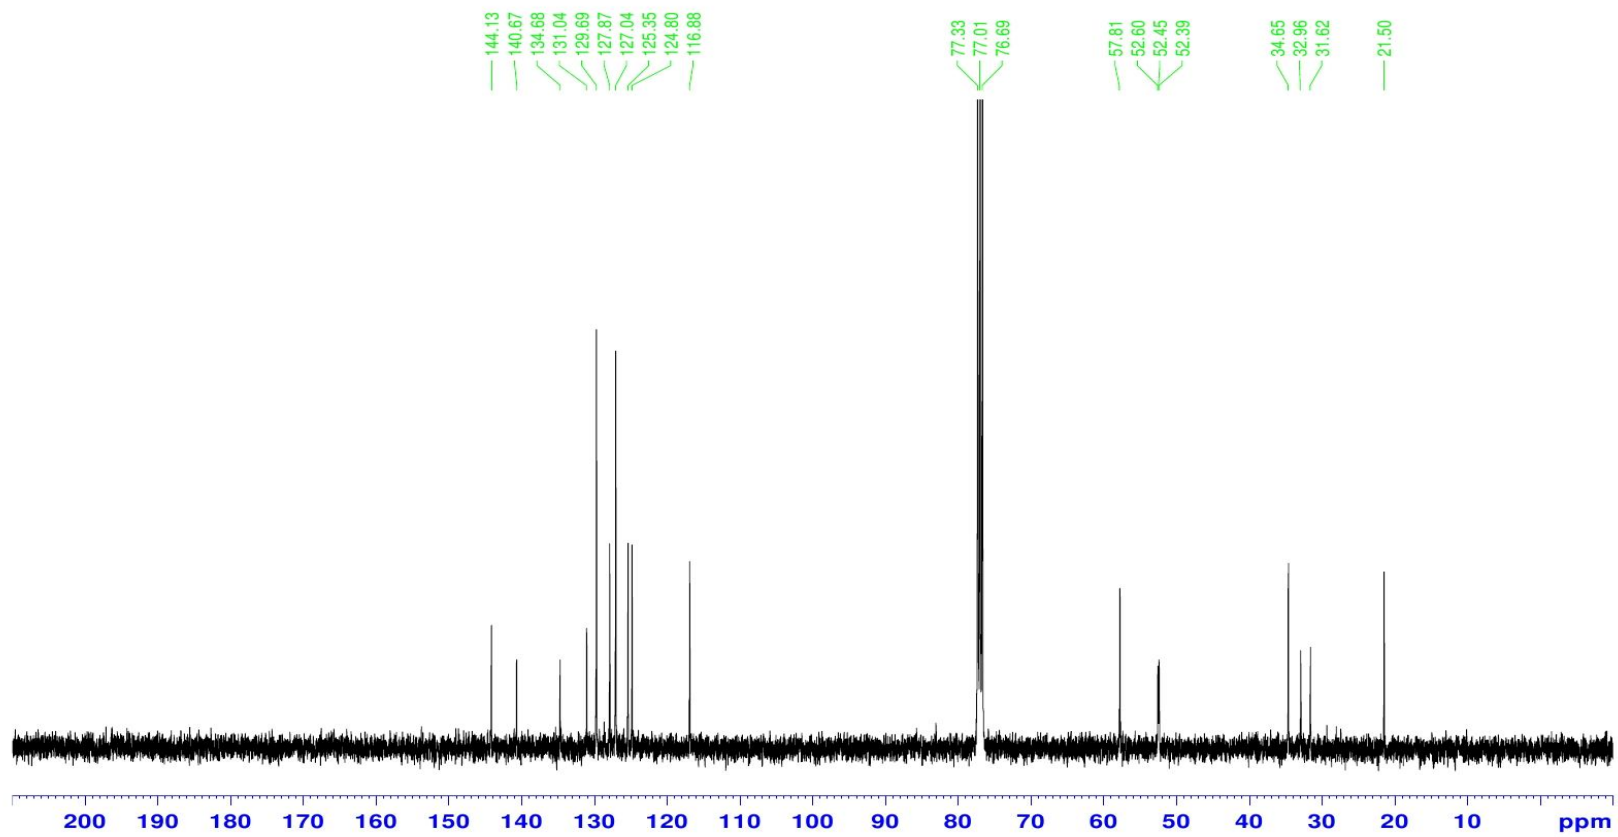

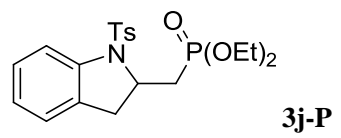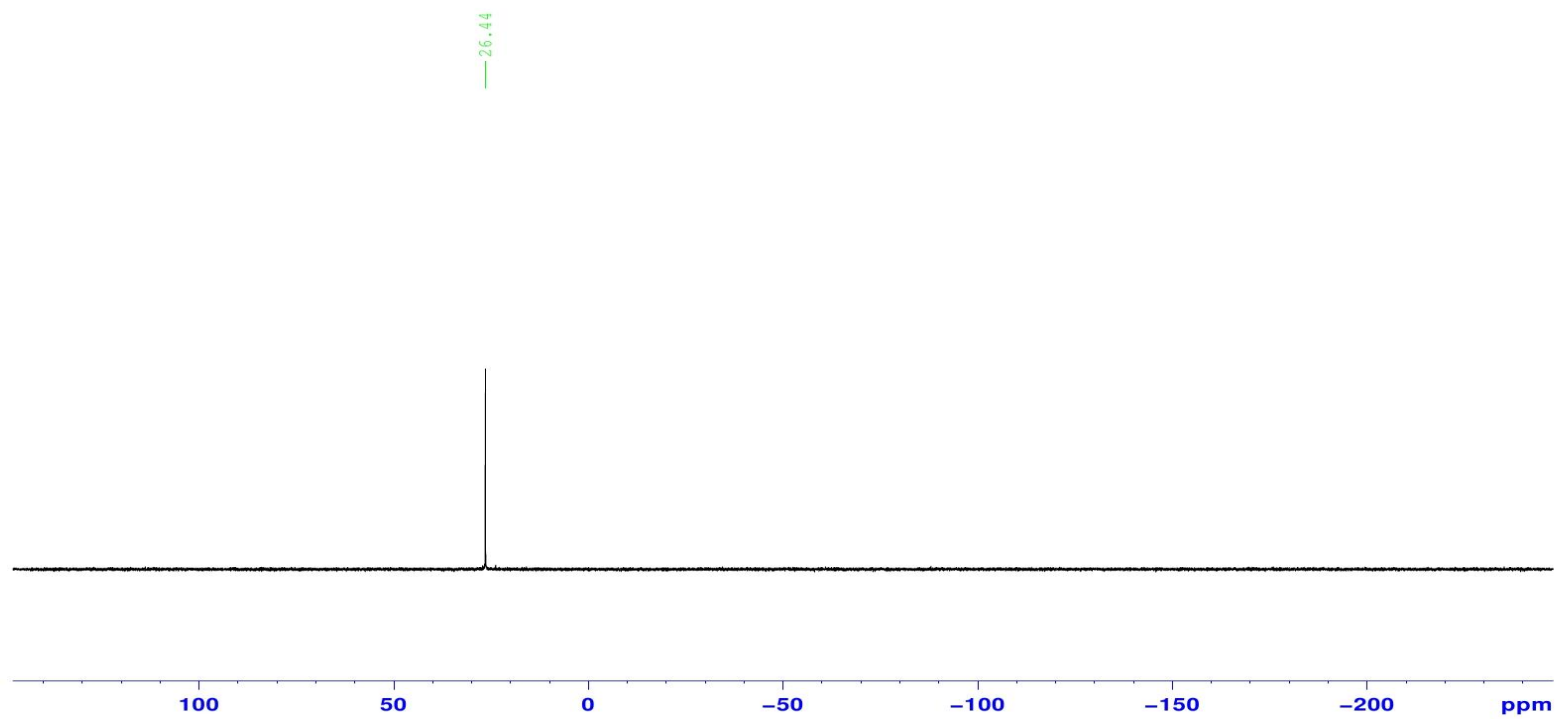

3j-H

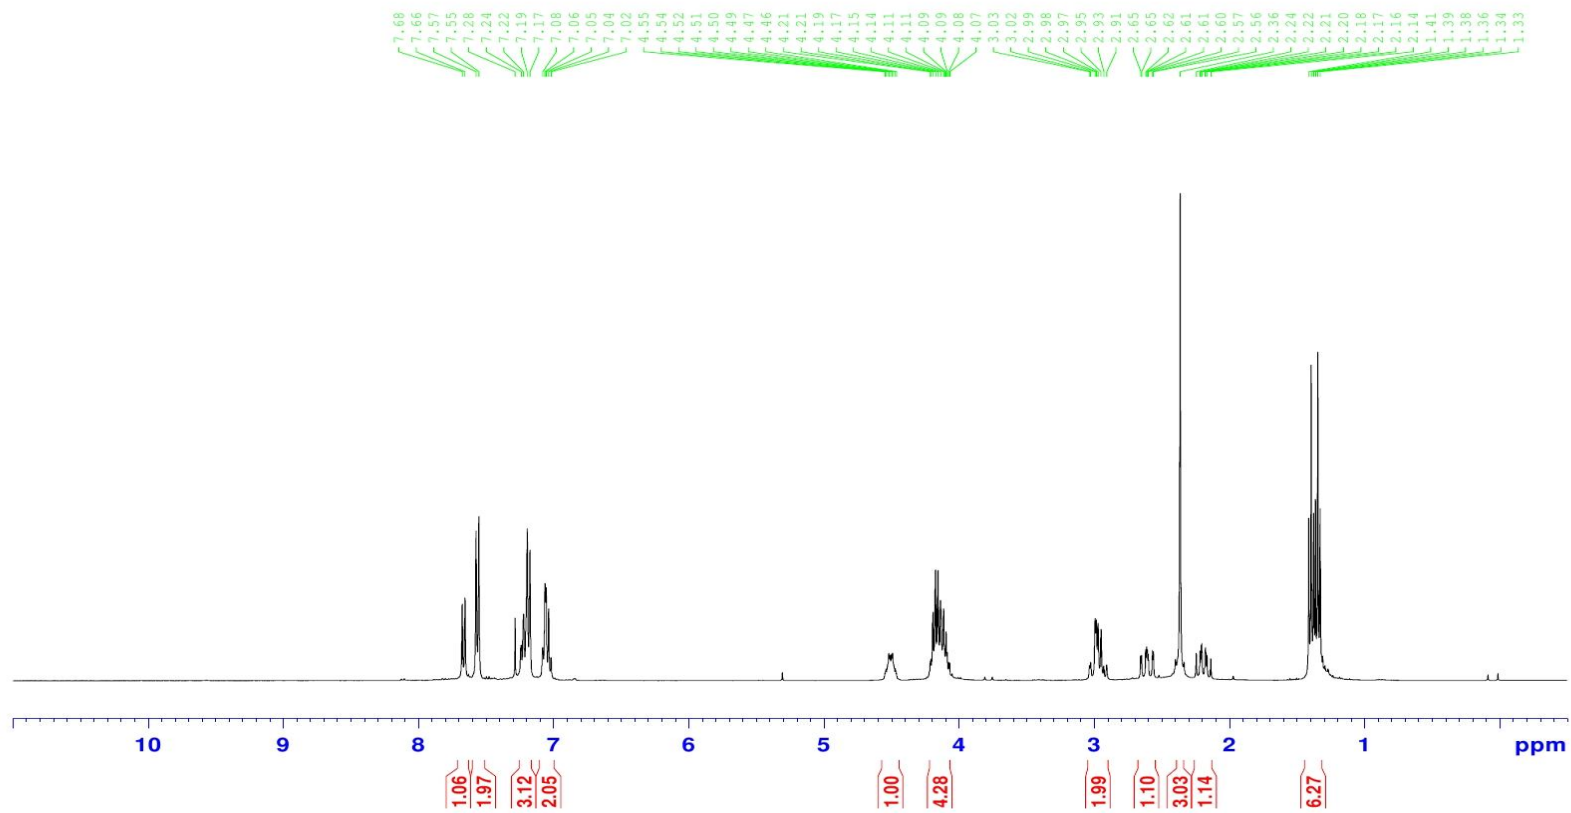

3j-C

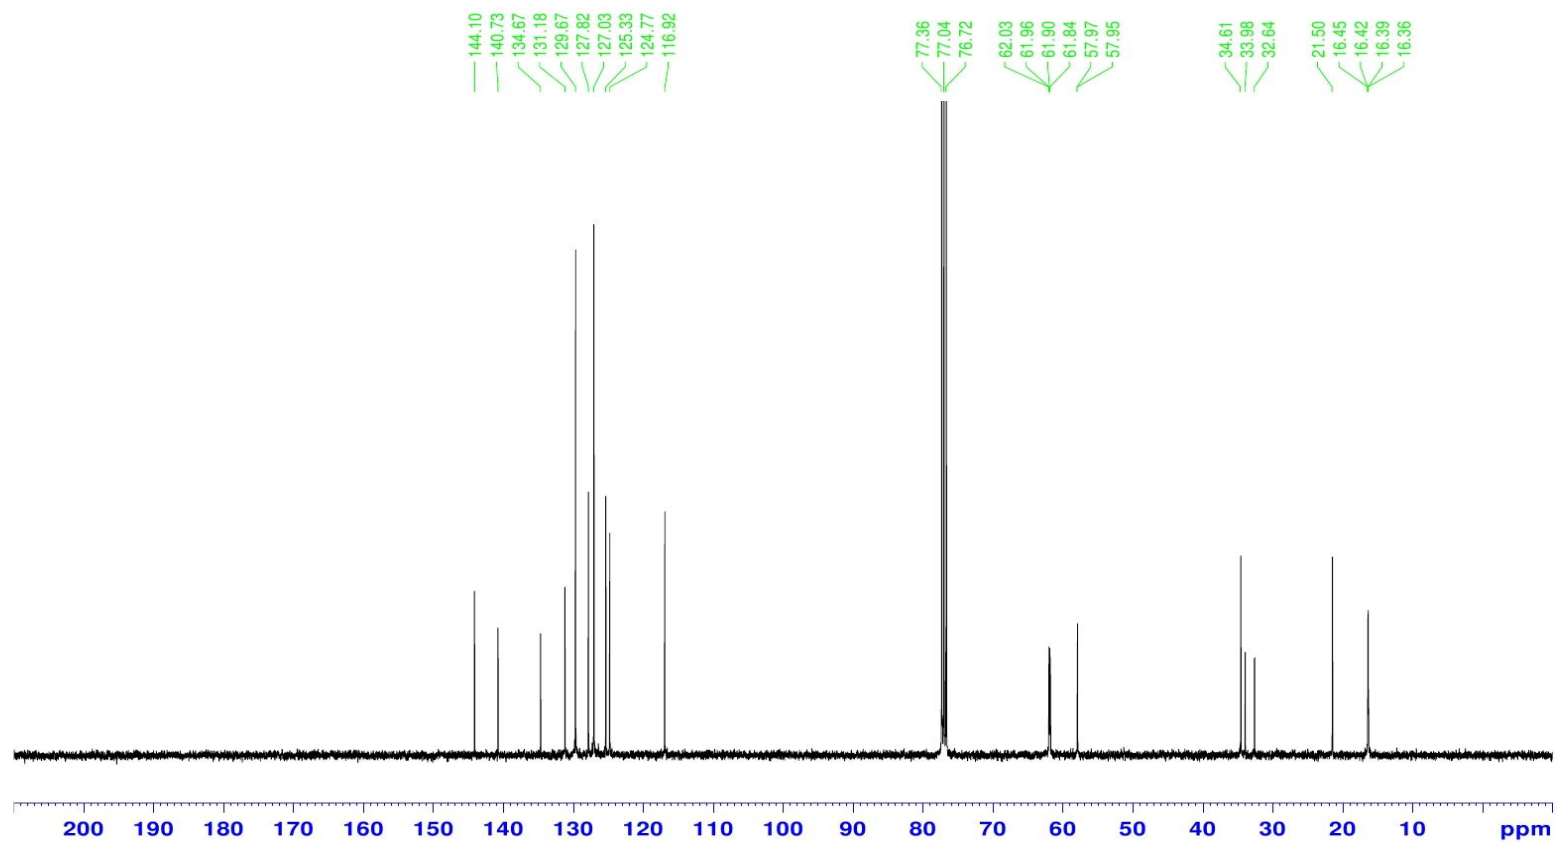

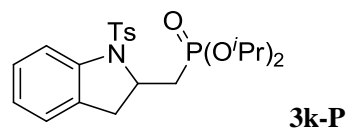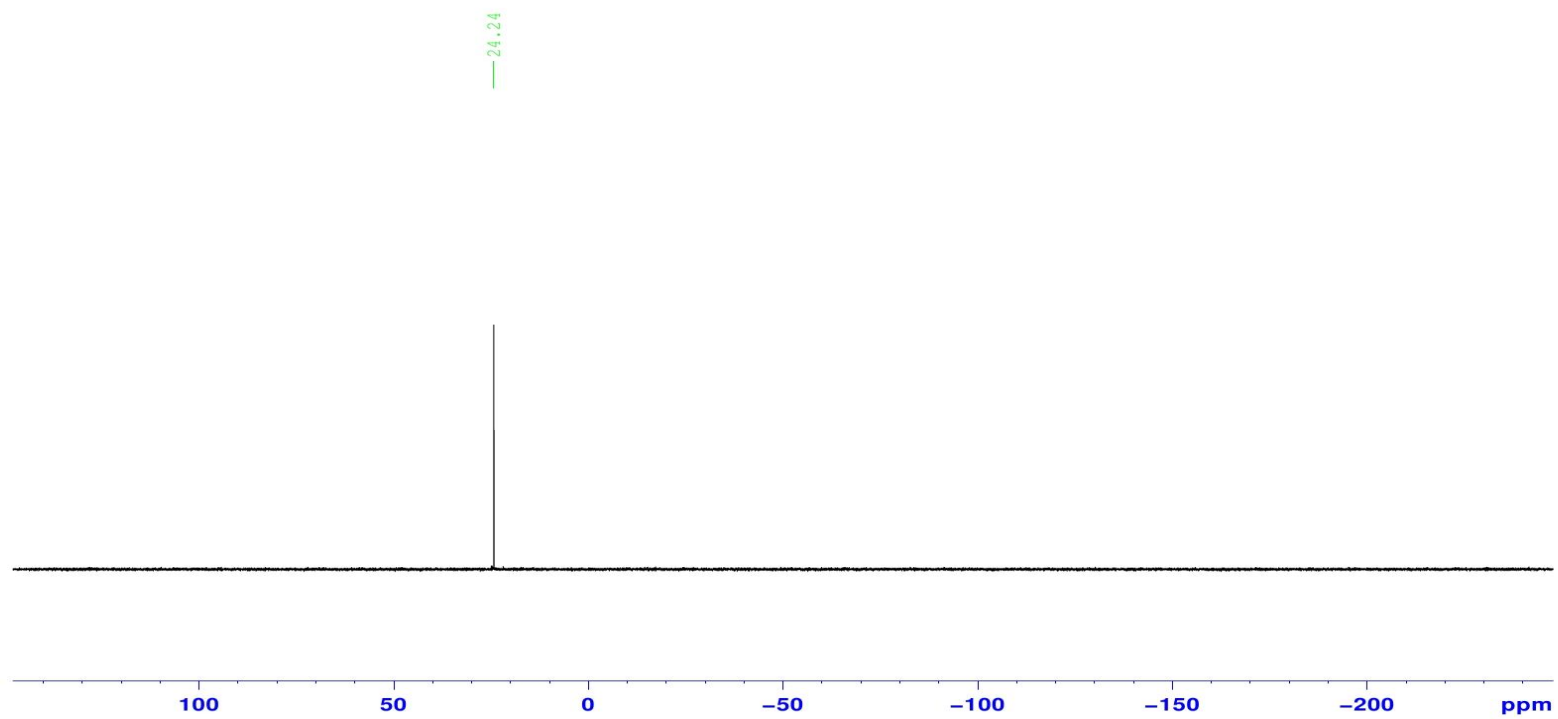



3k-H

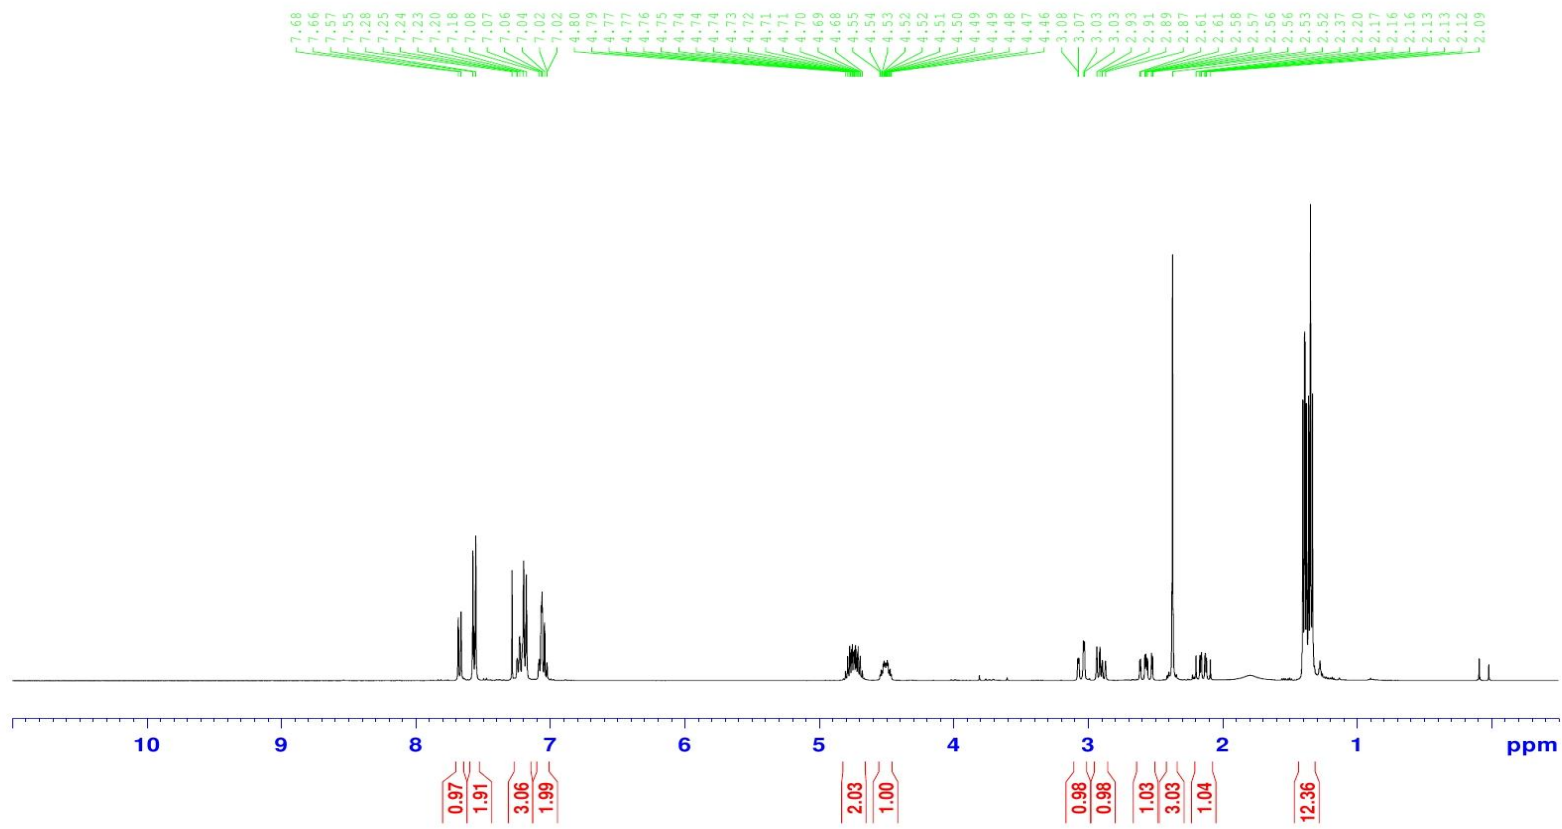

3k-C

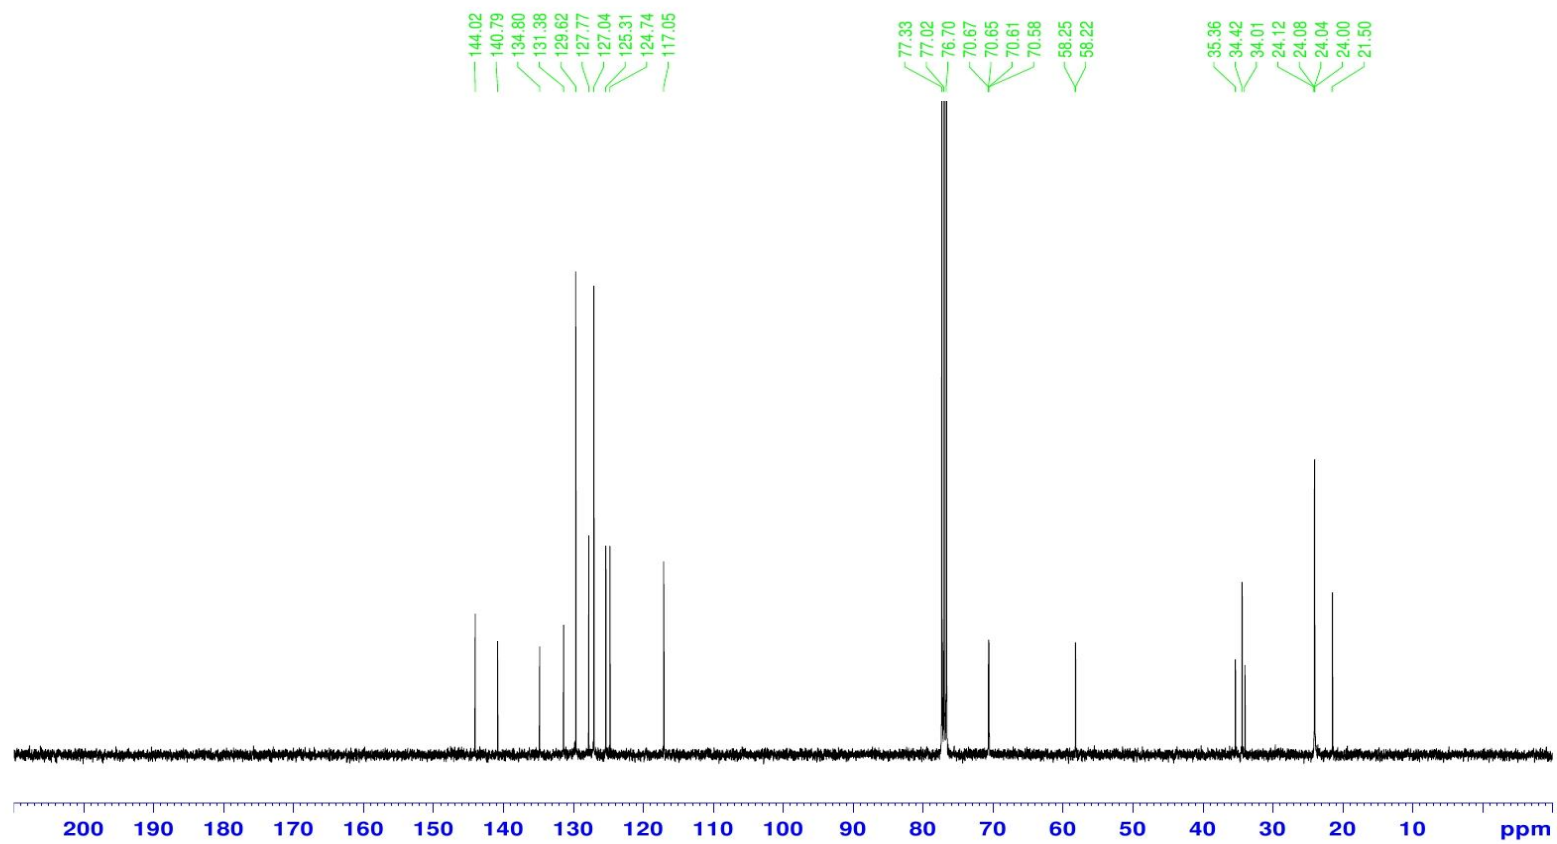

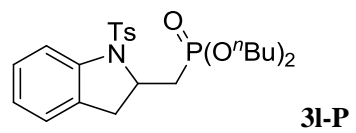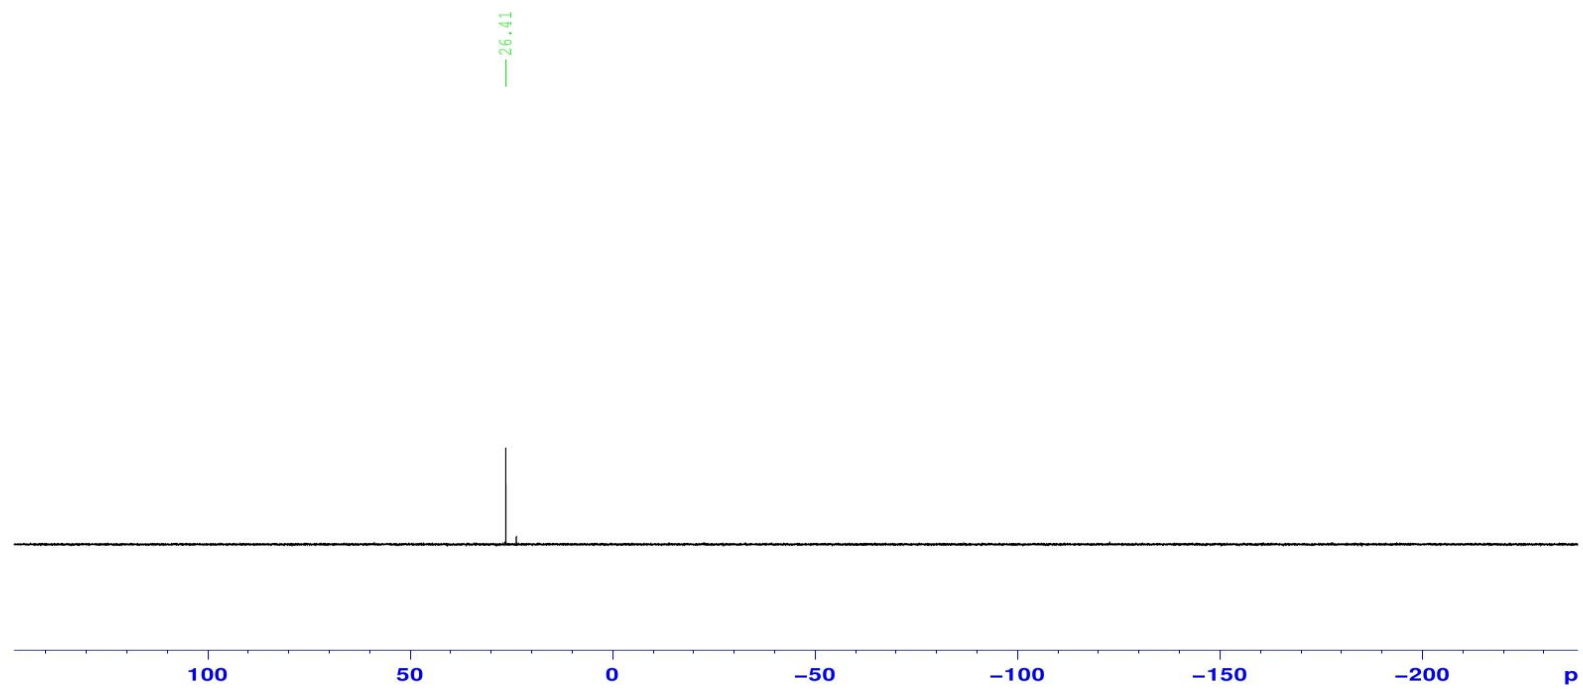

3I-H

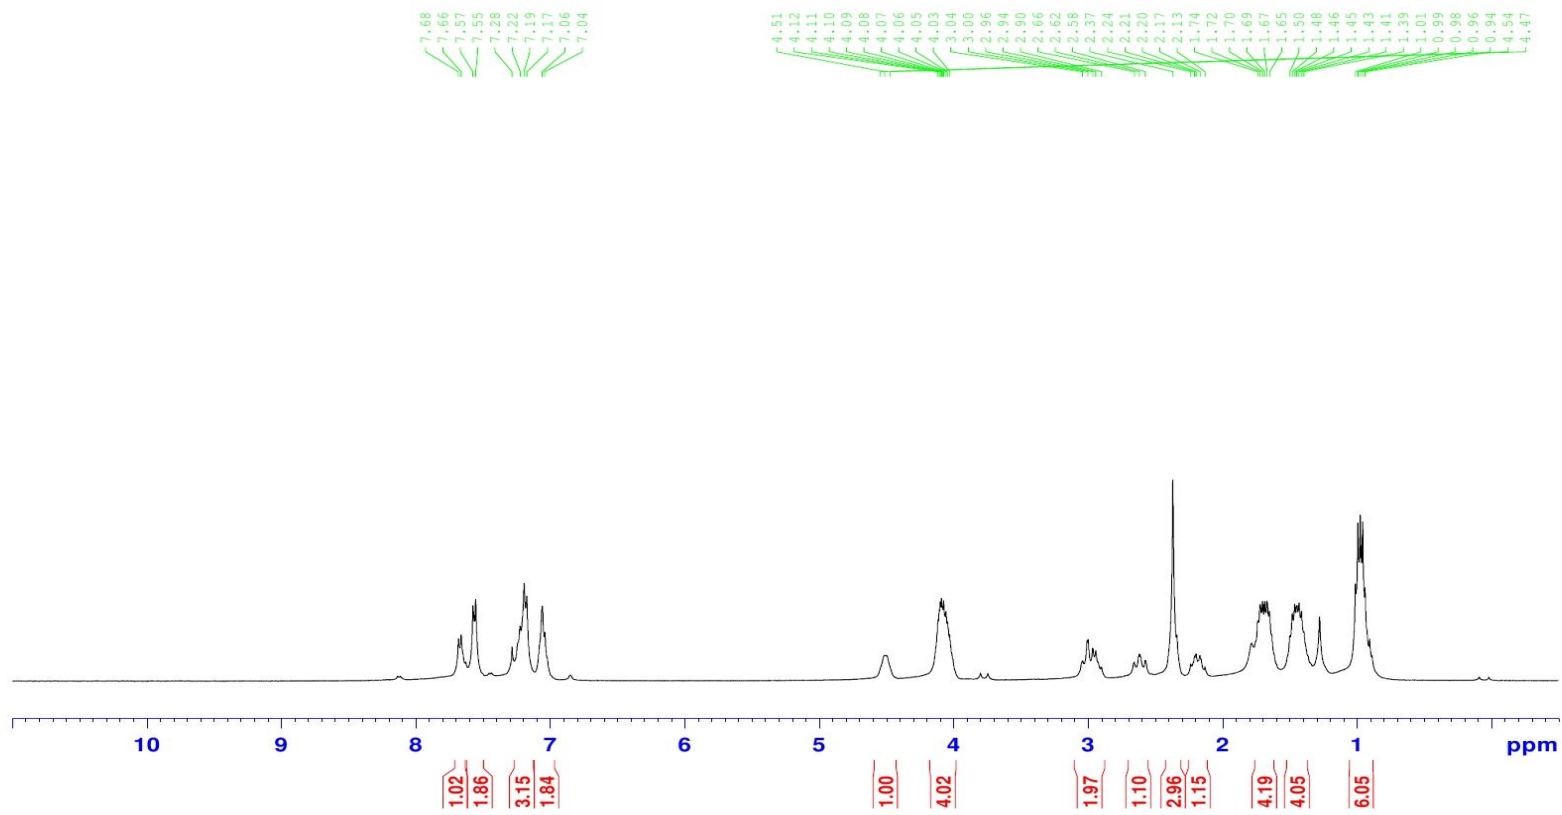

3I-C

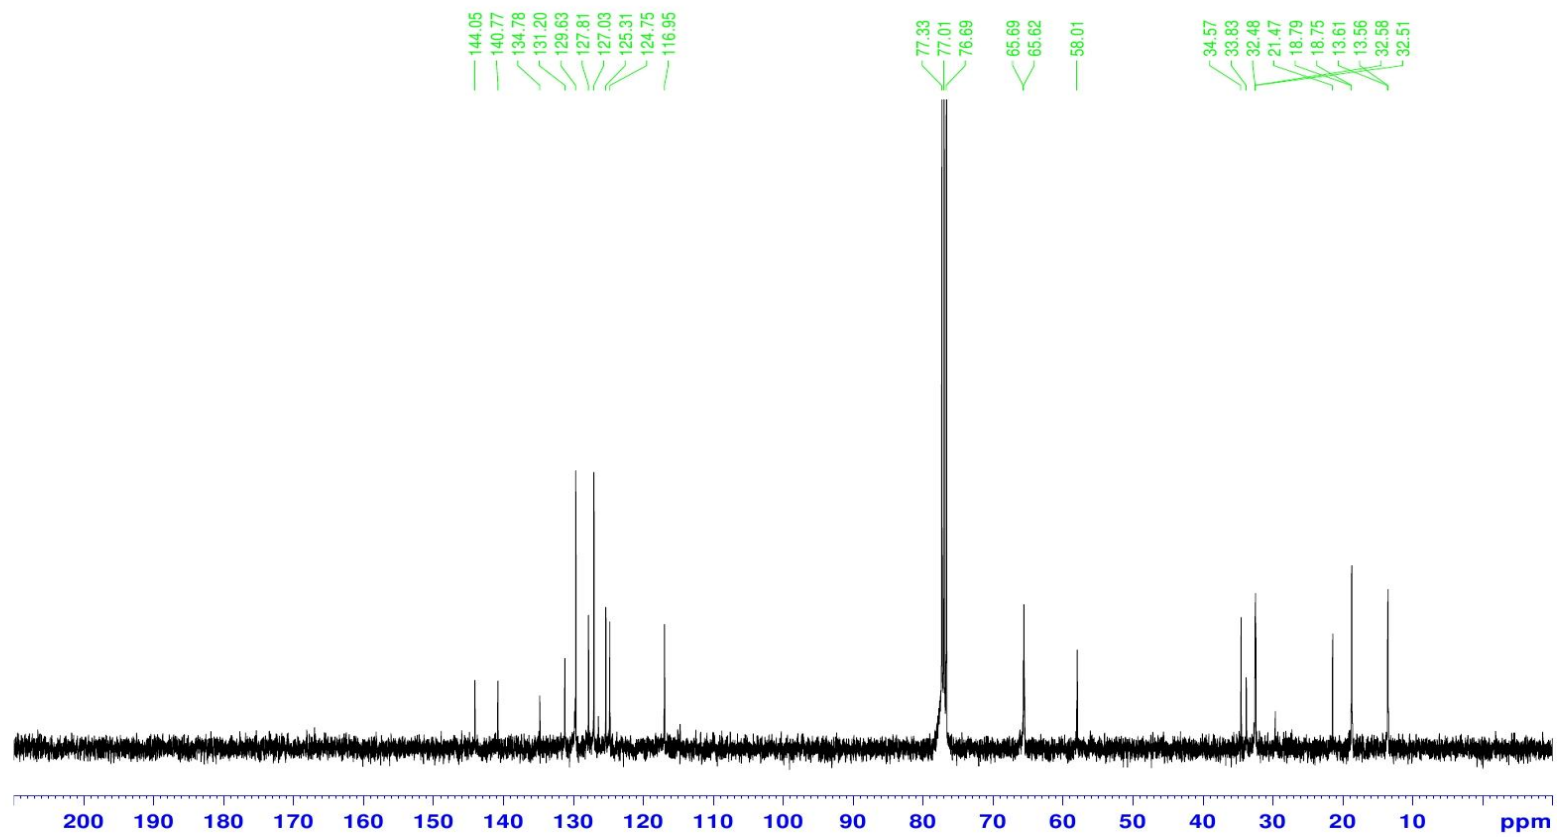



3m-H

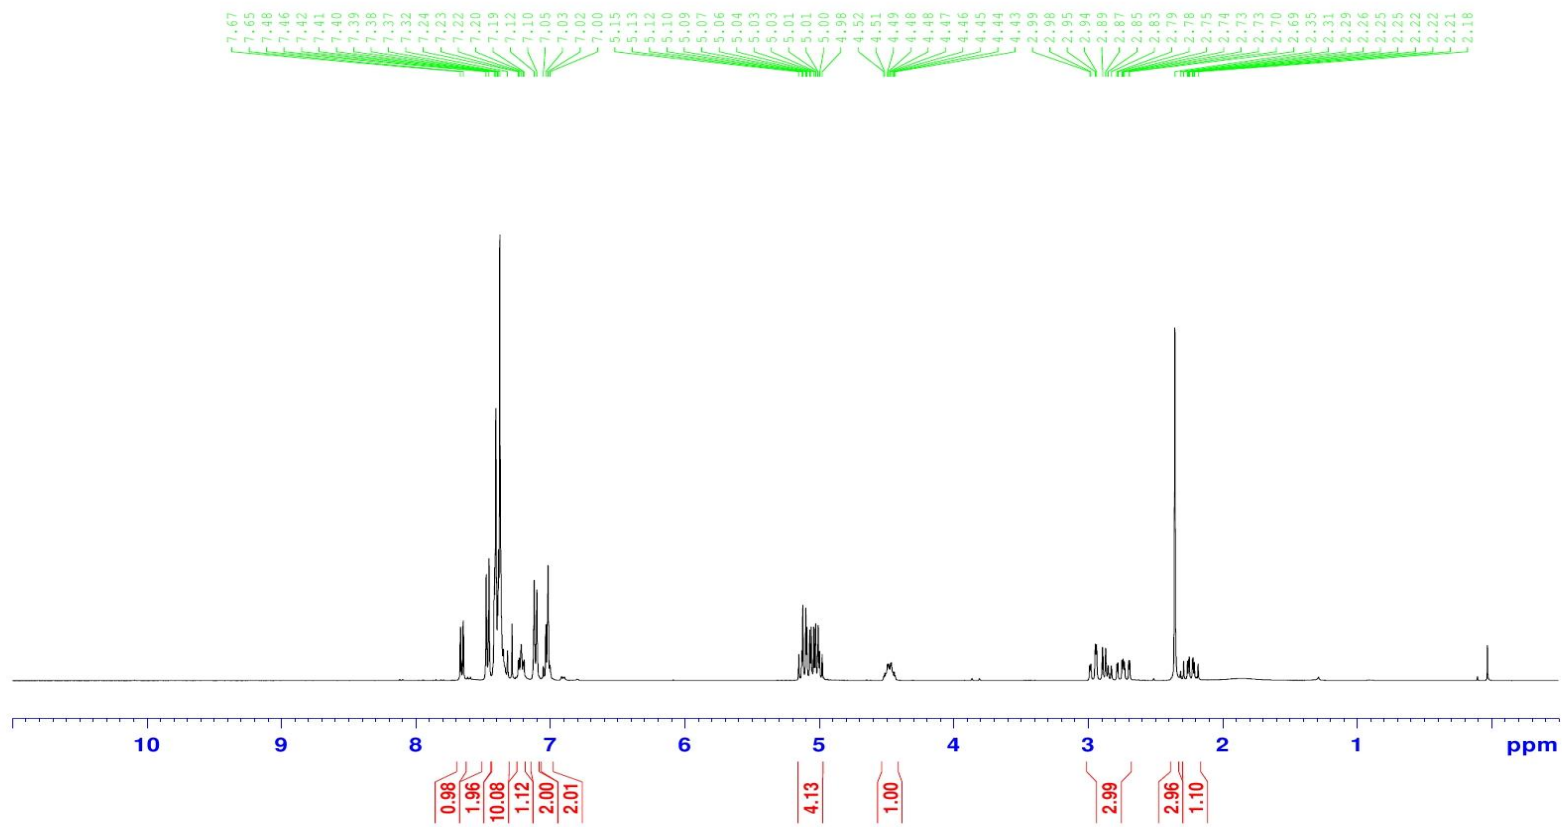

3m-C

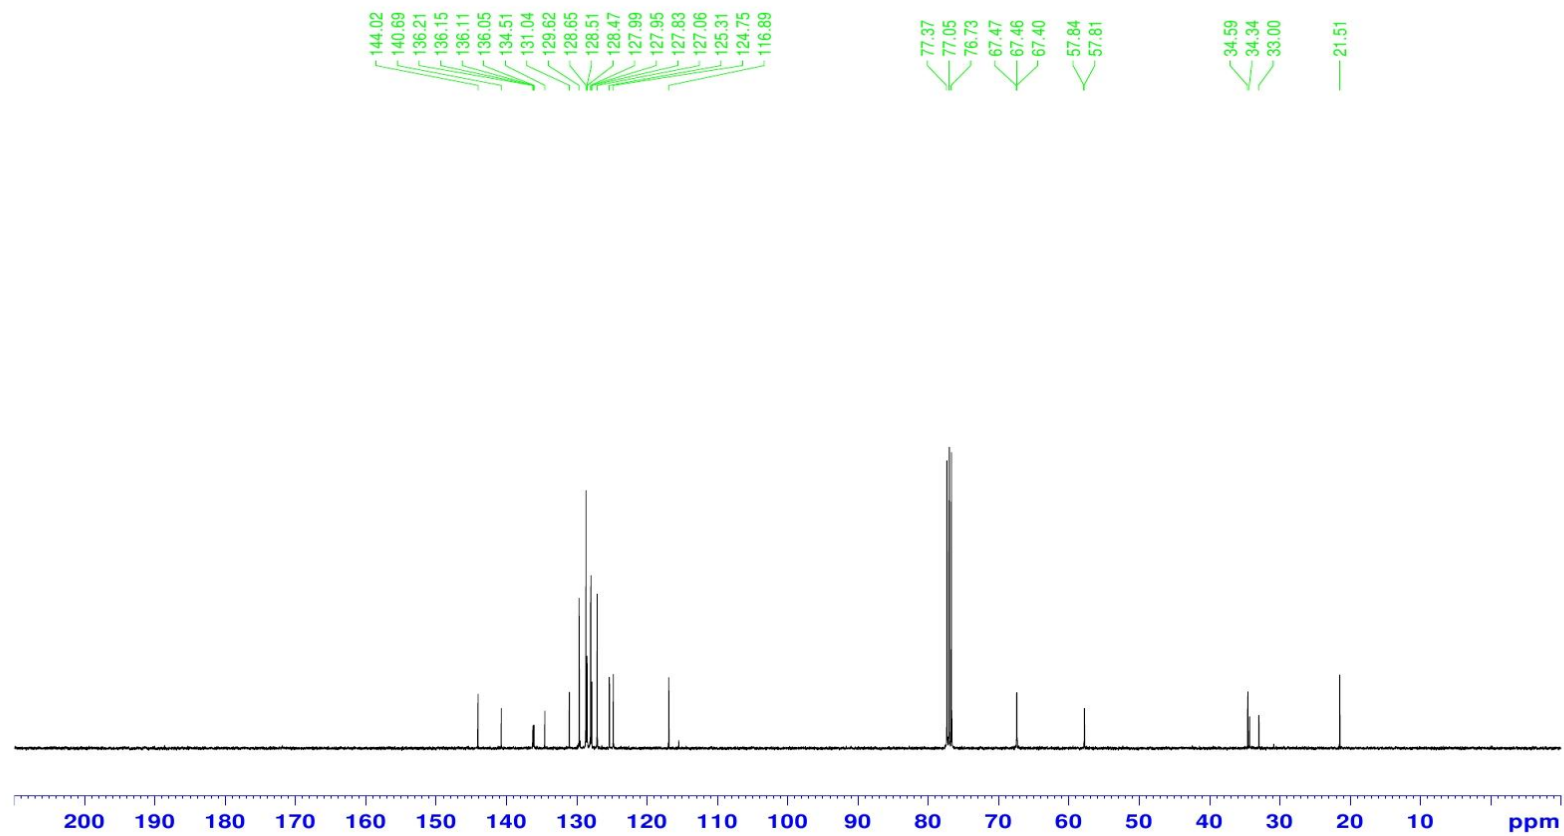



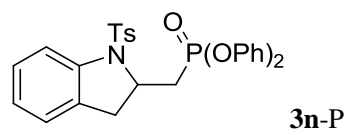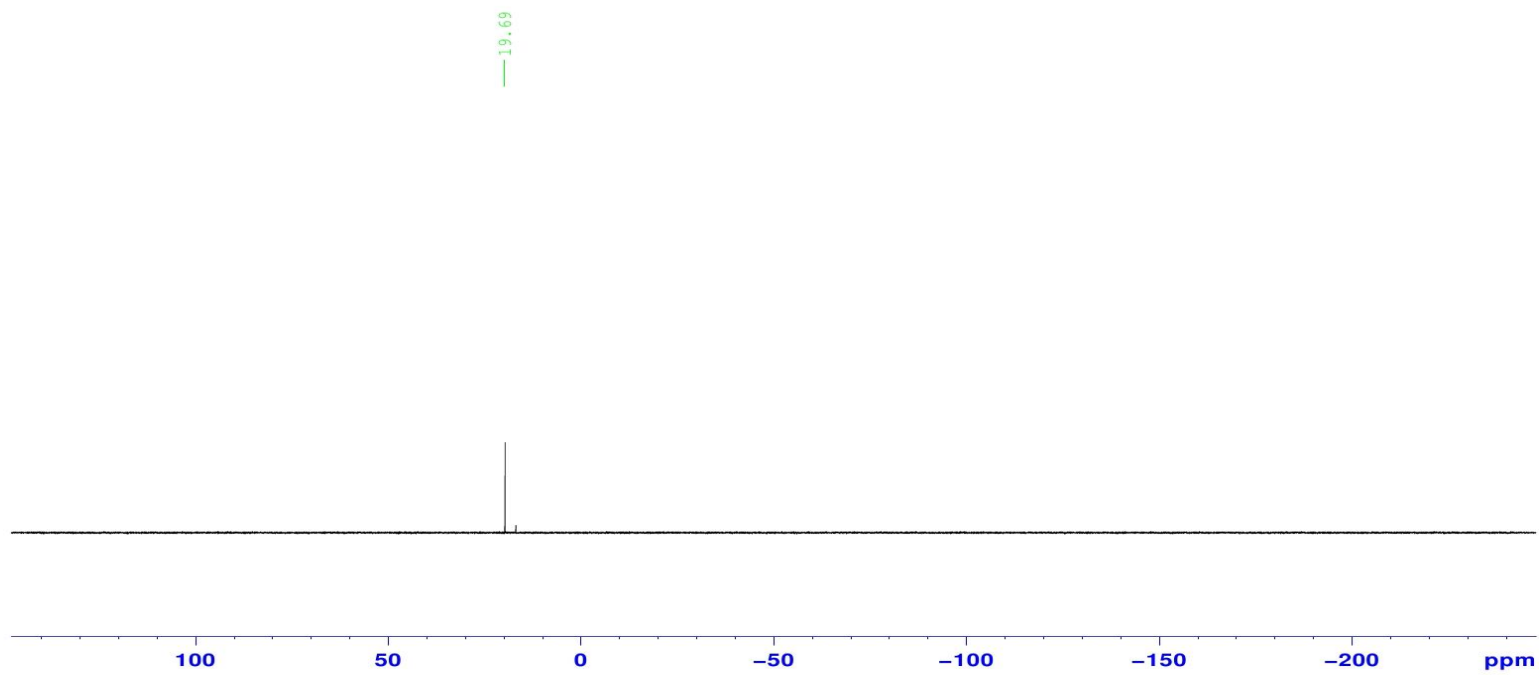

3n-H

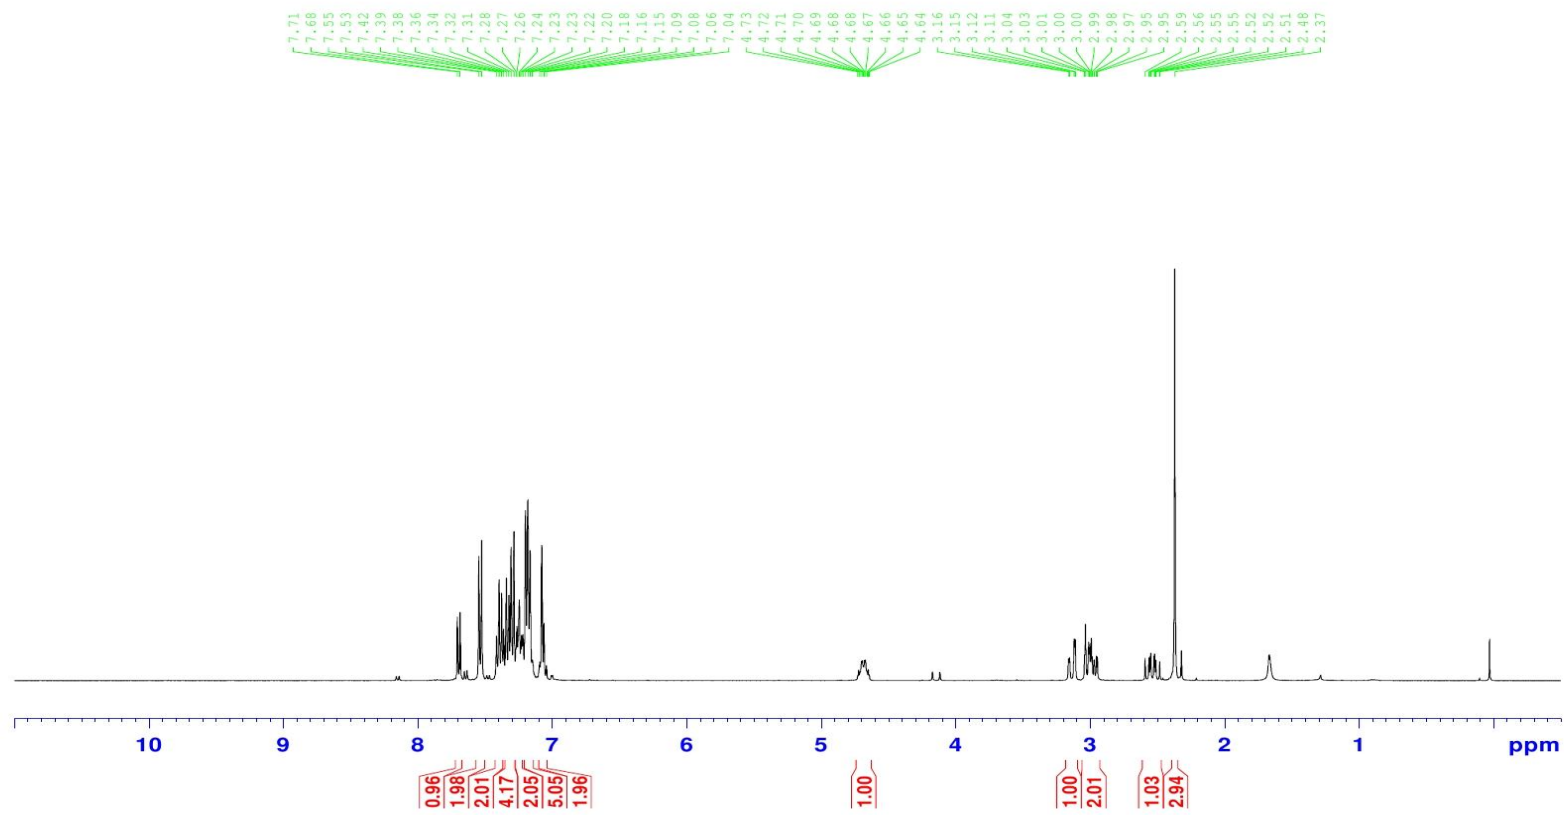

3n-C

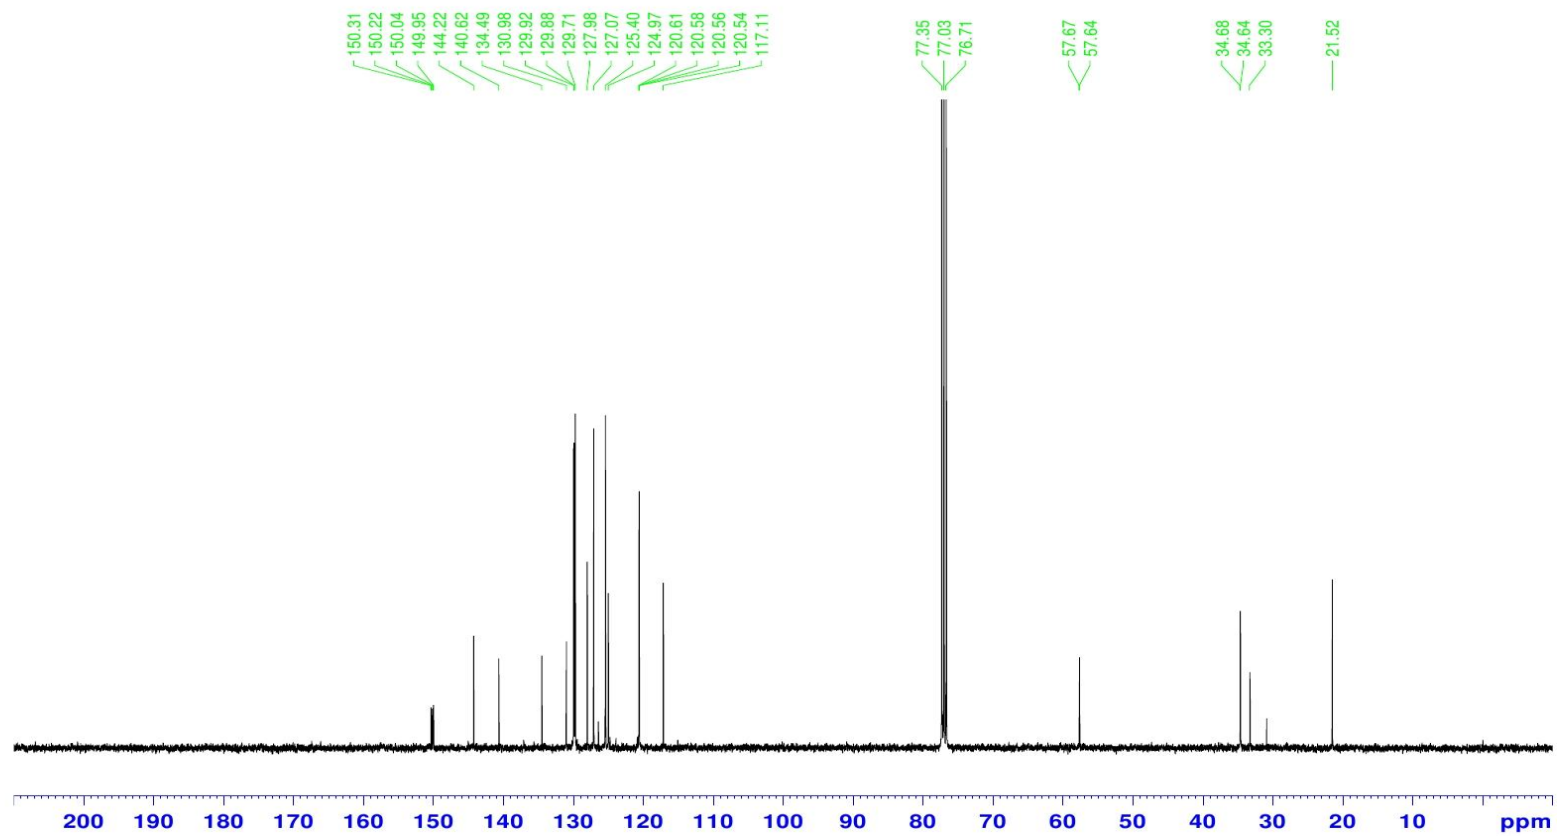

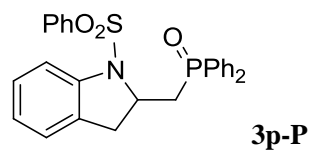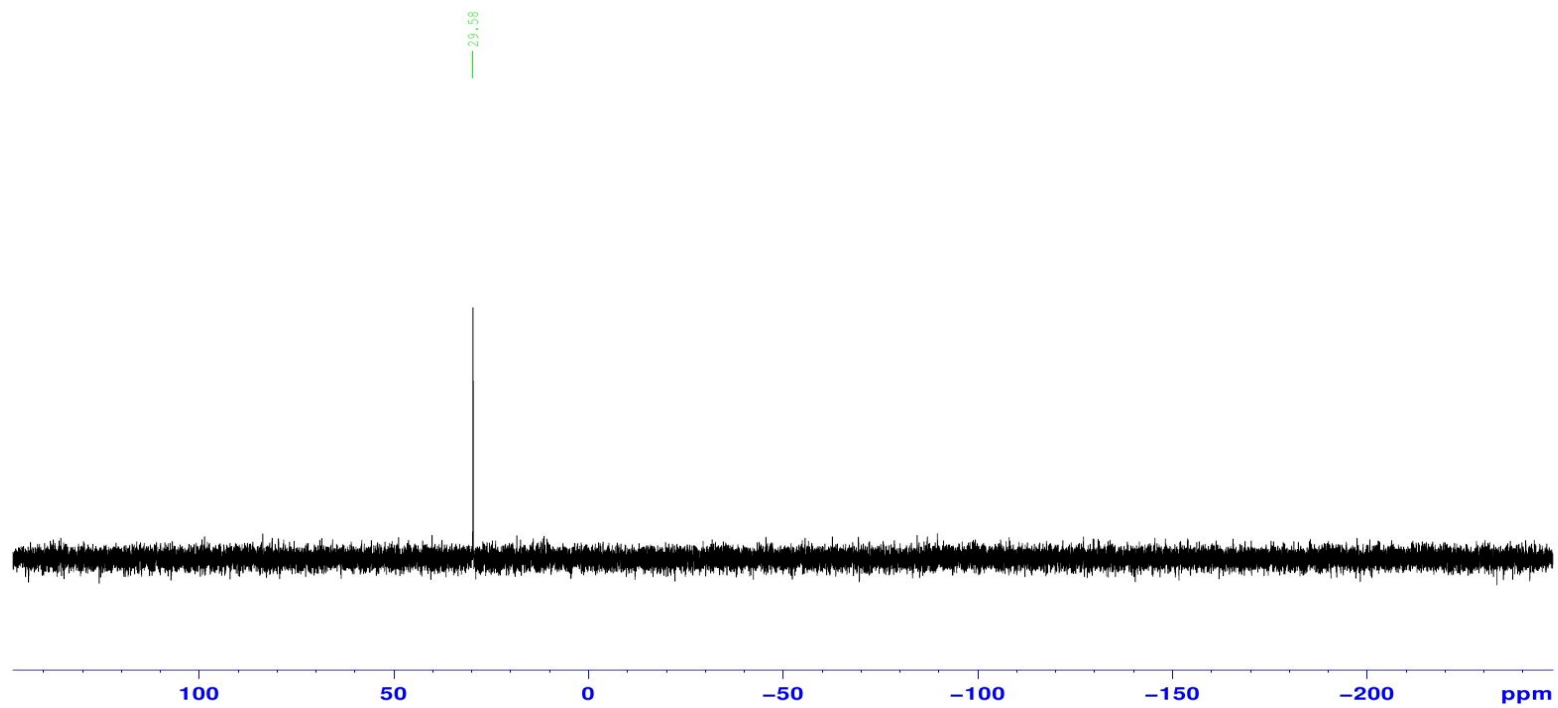

3p-H

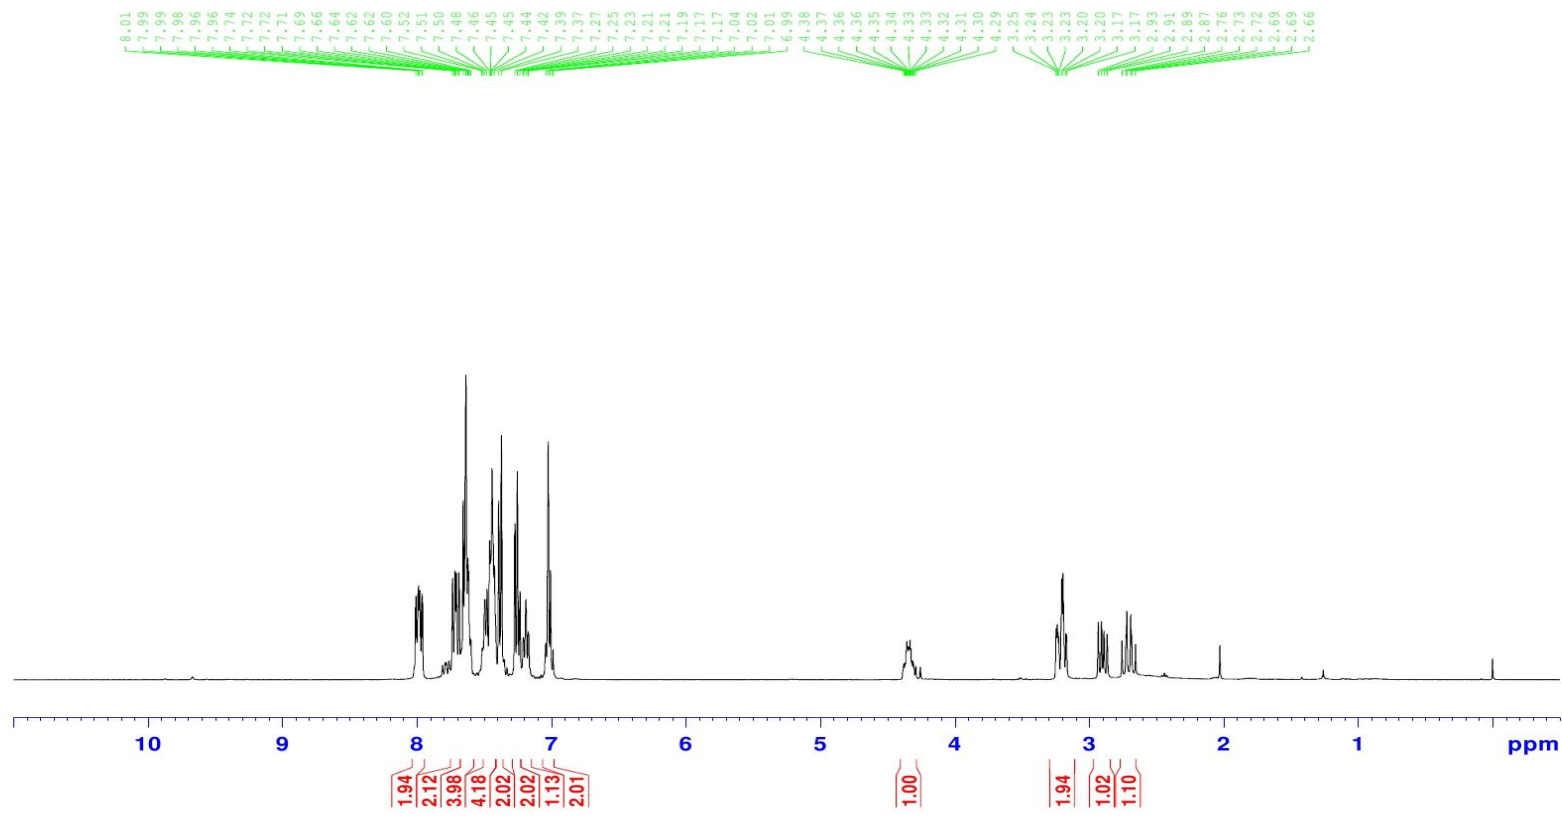

3p-C

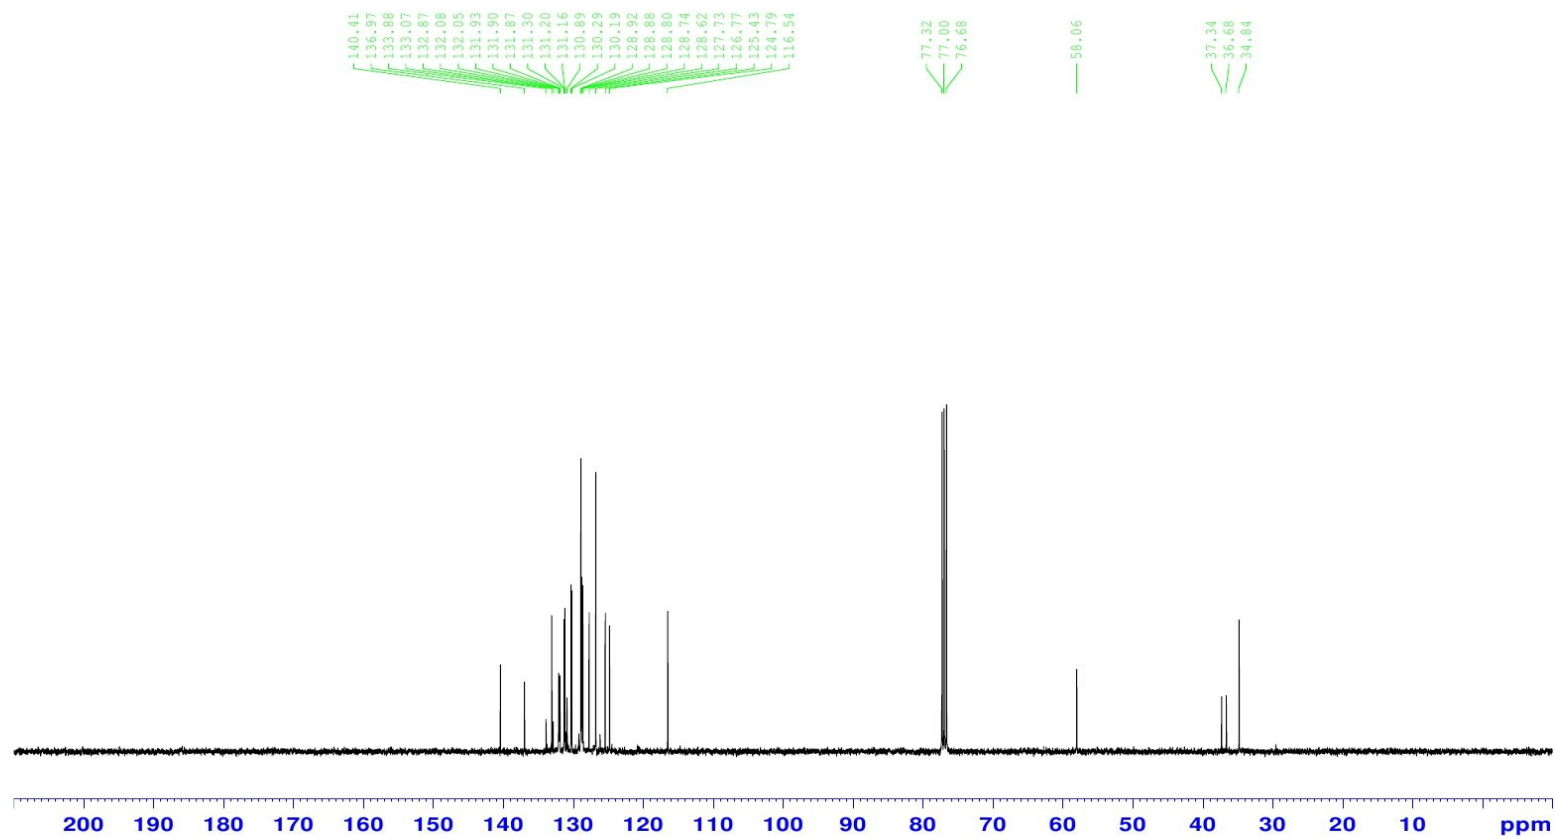

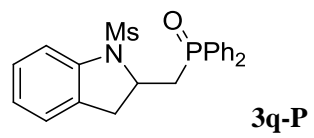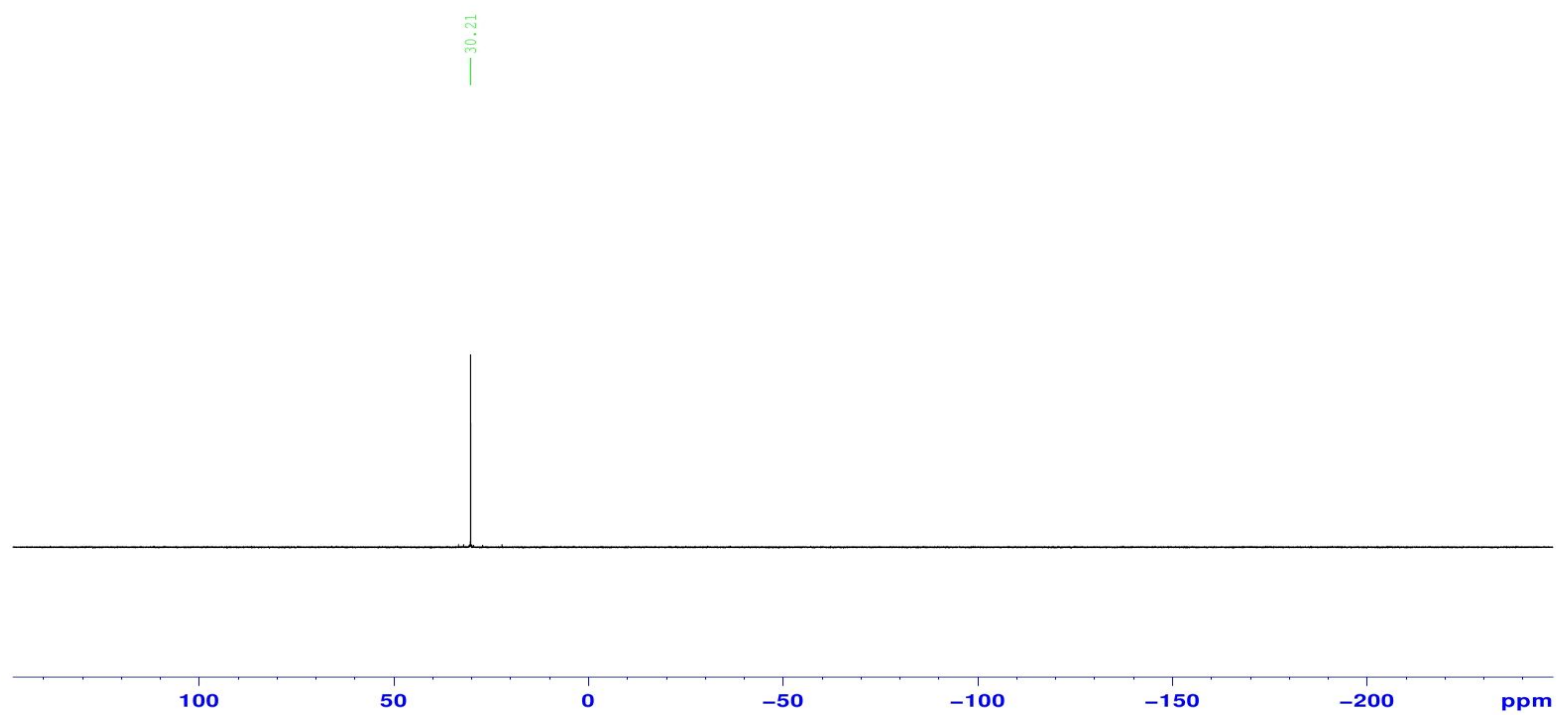

3q-H

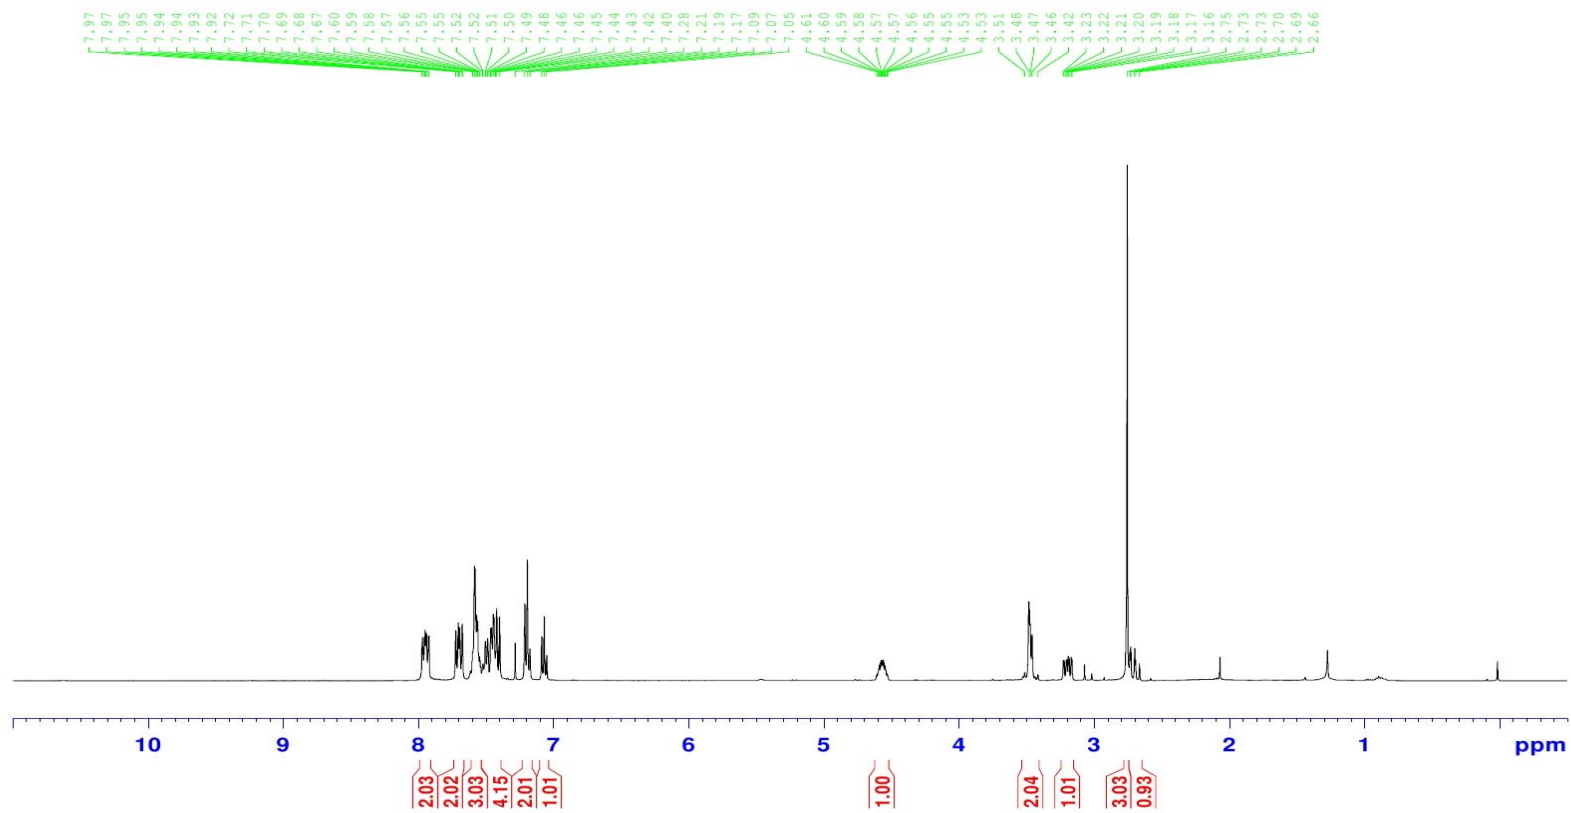



3q-C

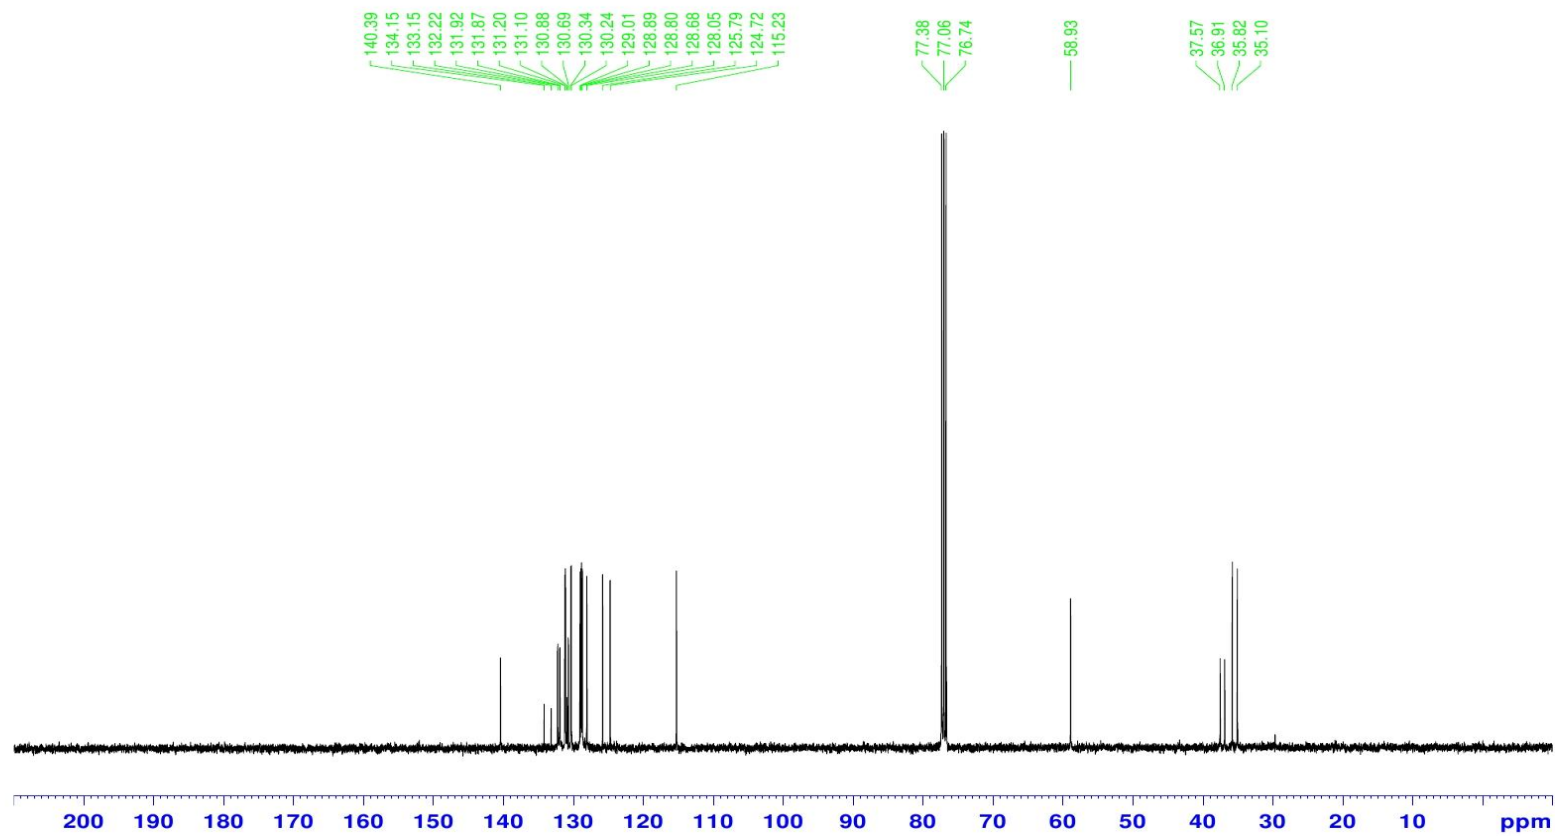

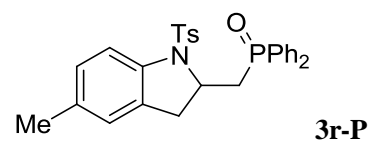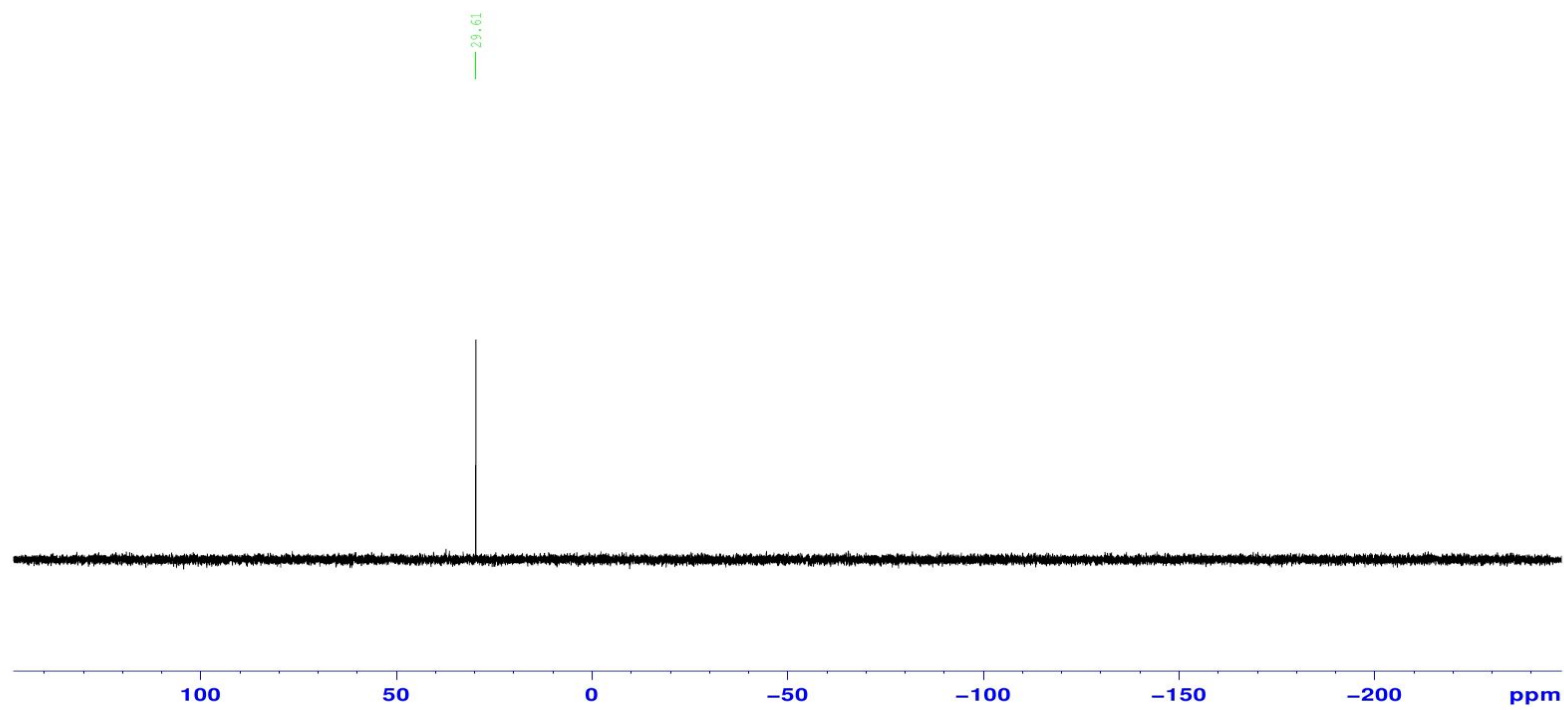

3r-H

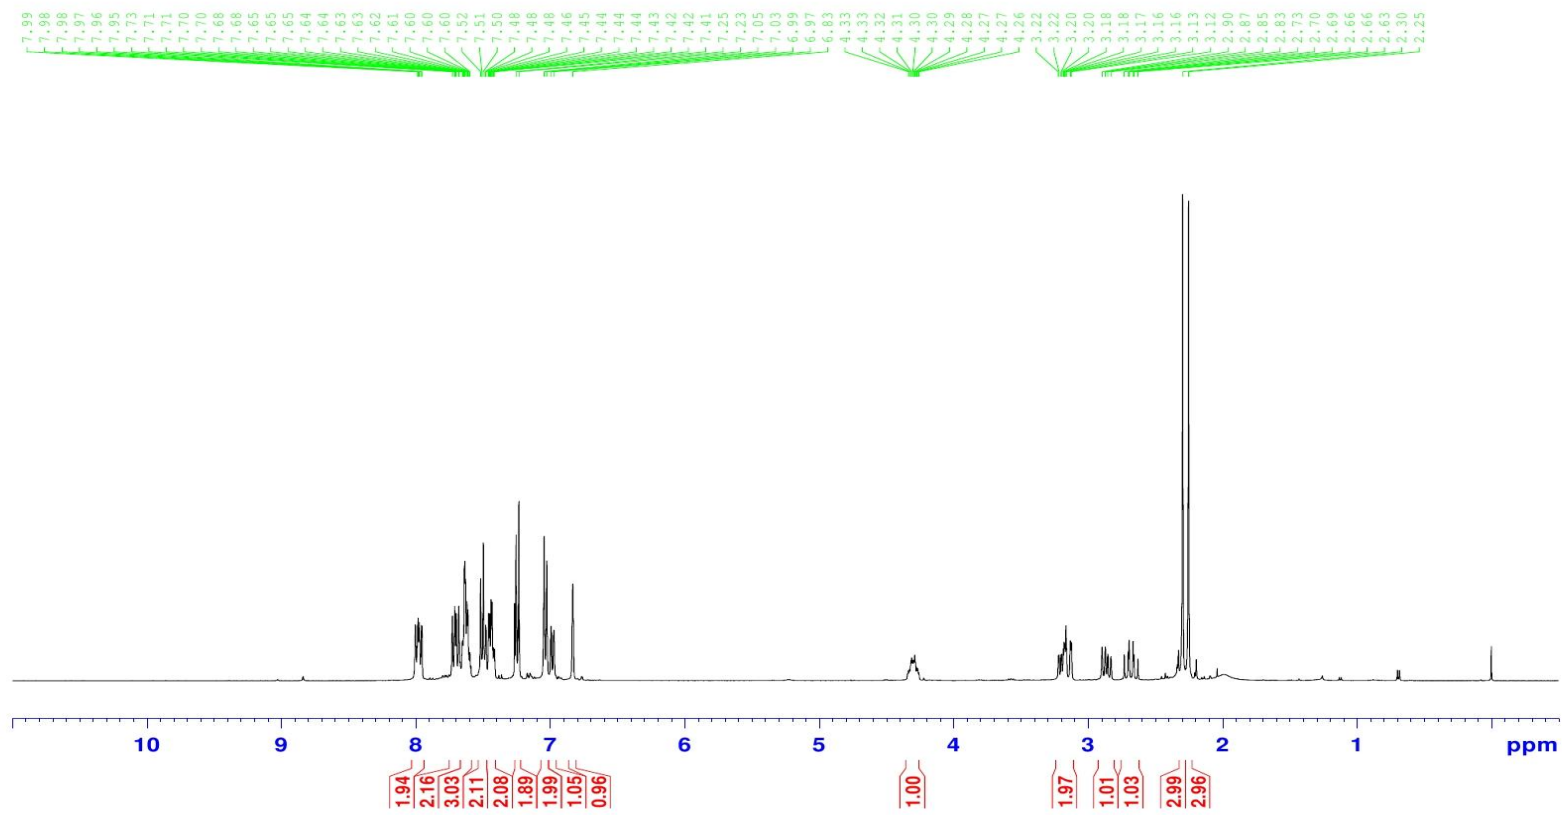

3r-C

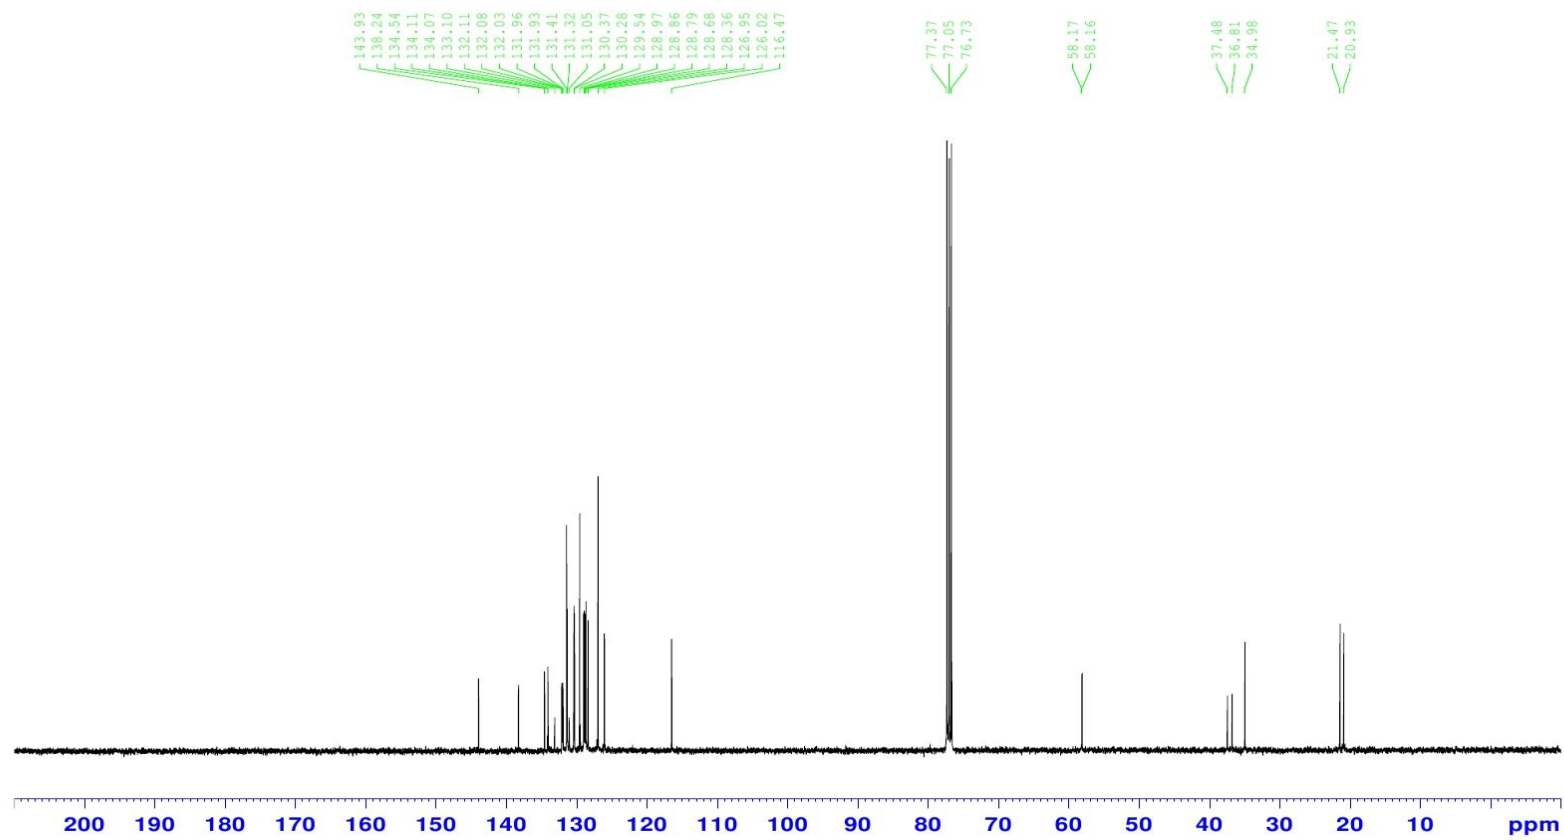

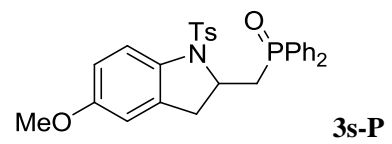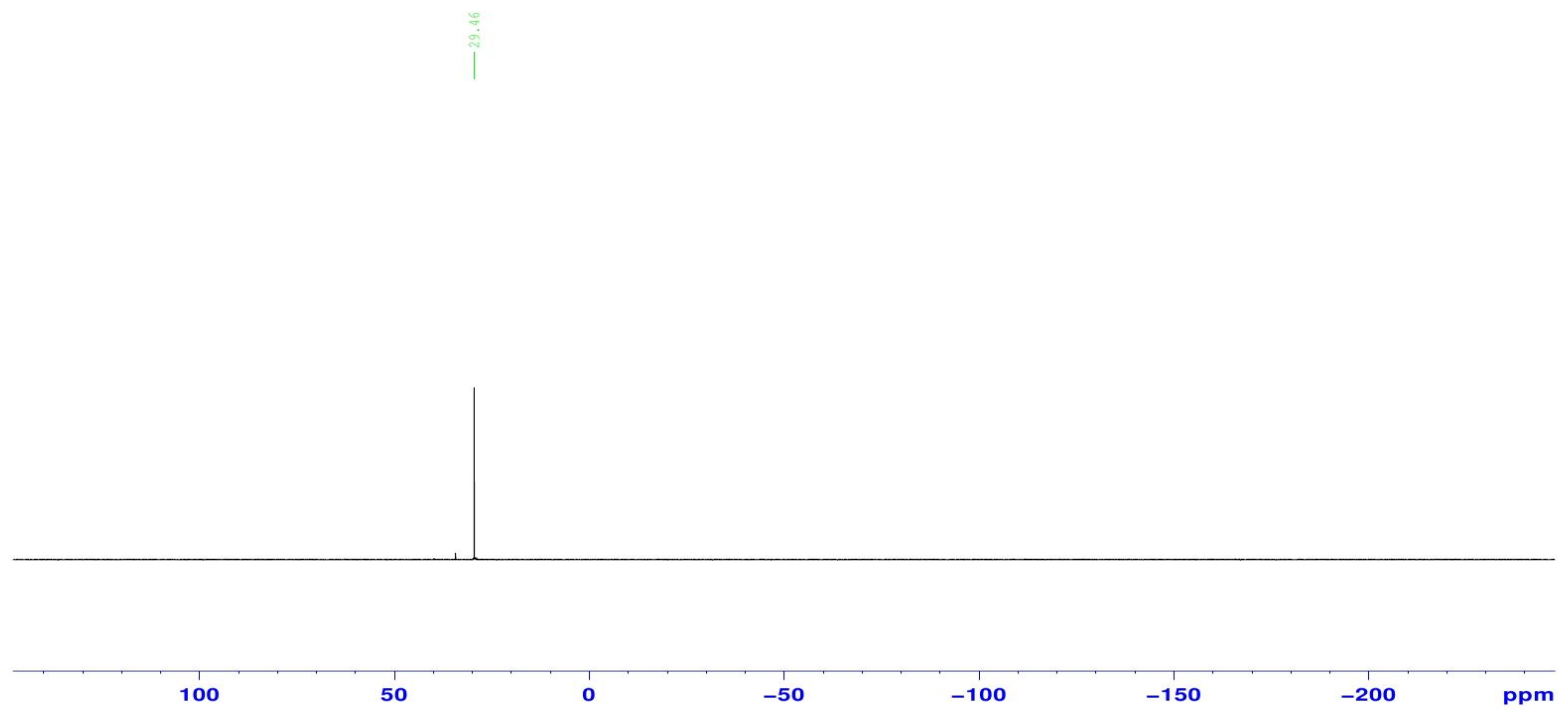

3s-H

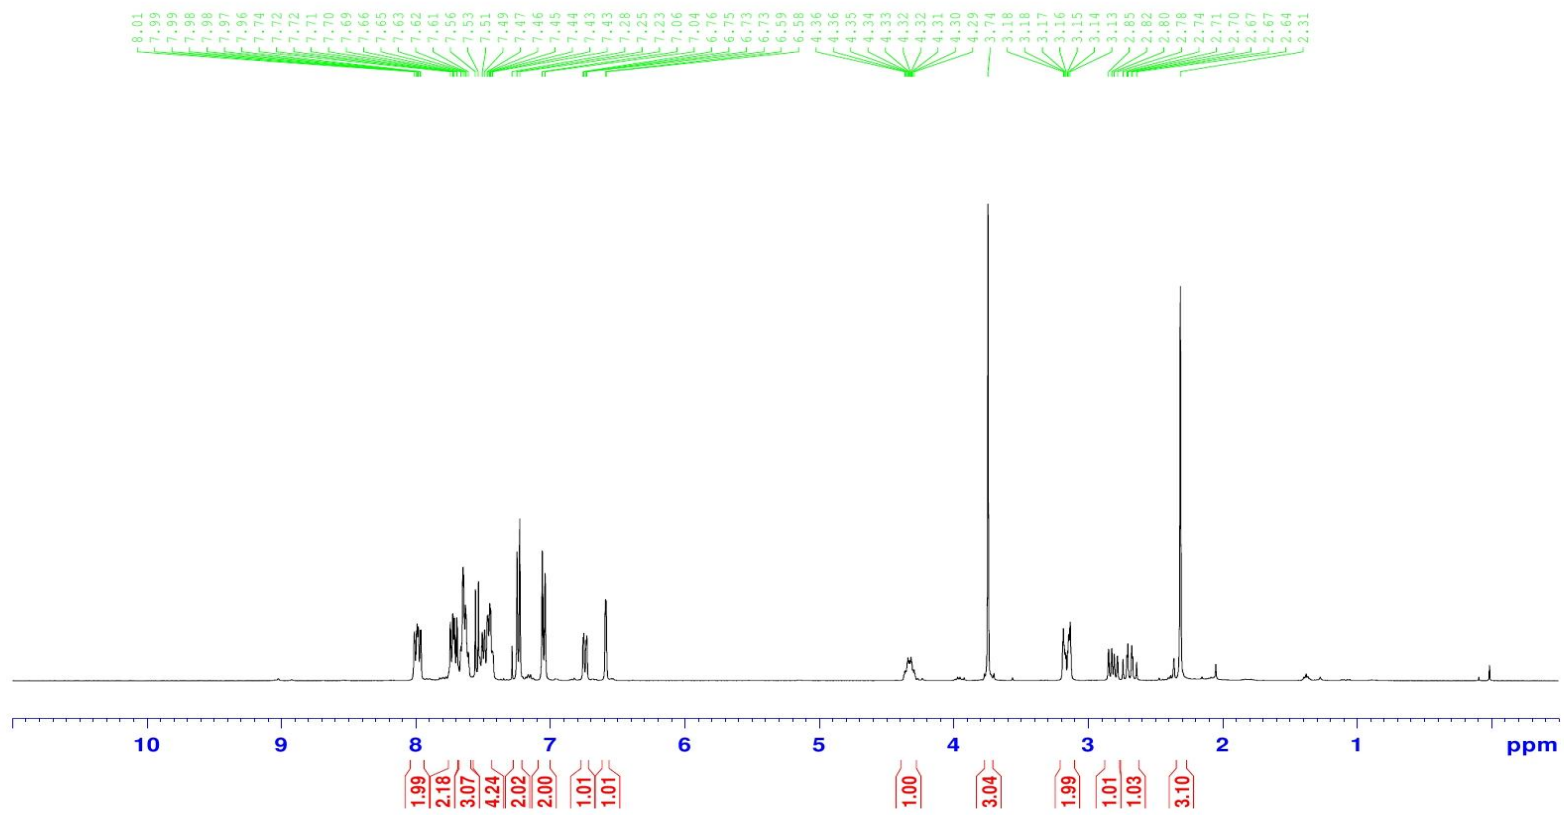

3s-C

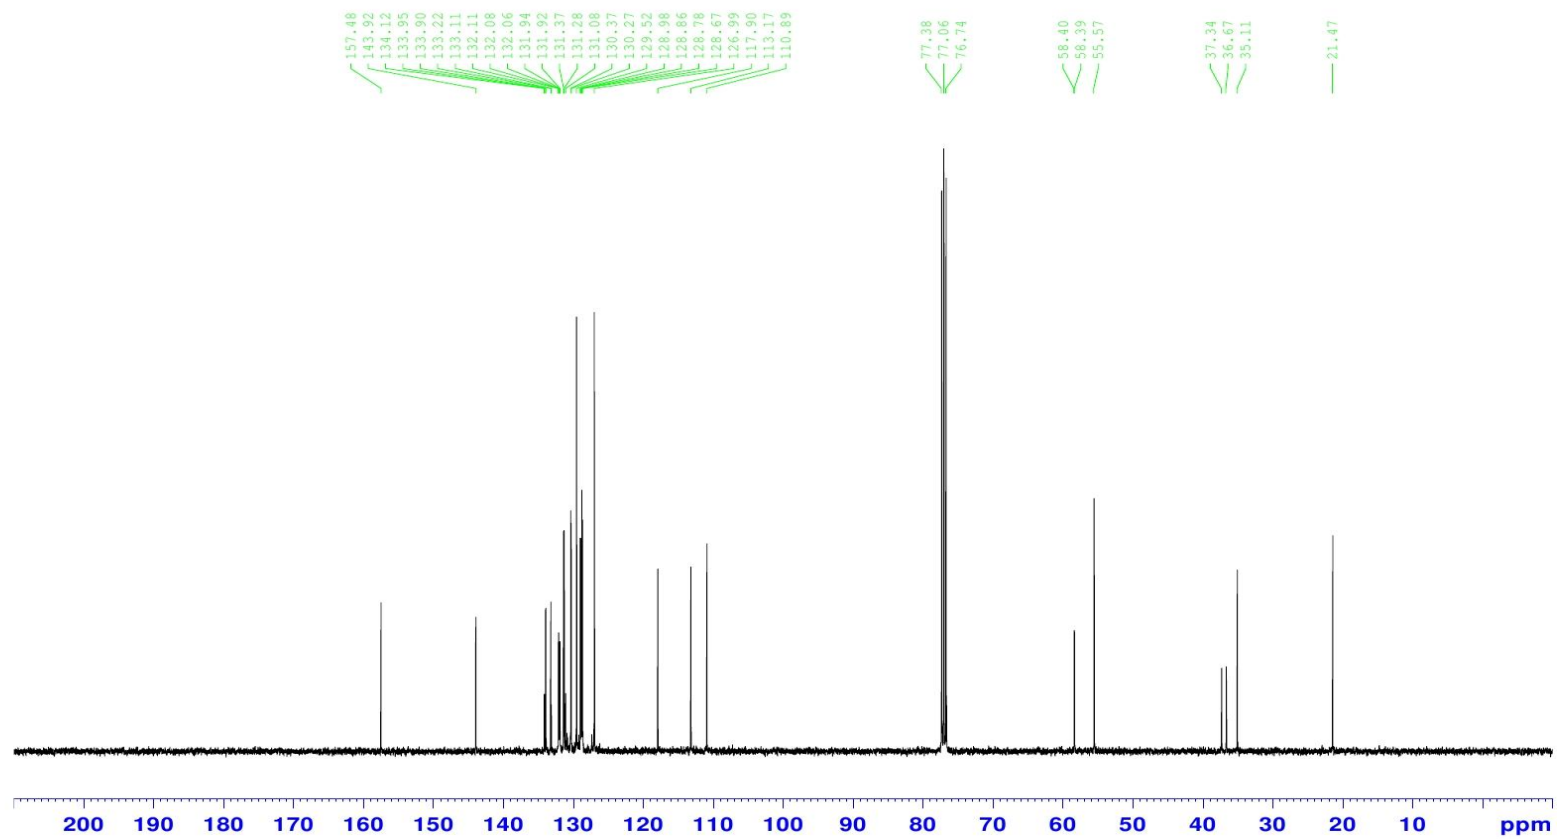

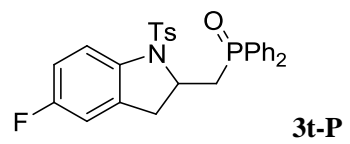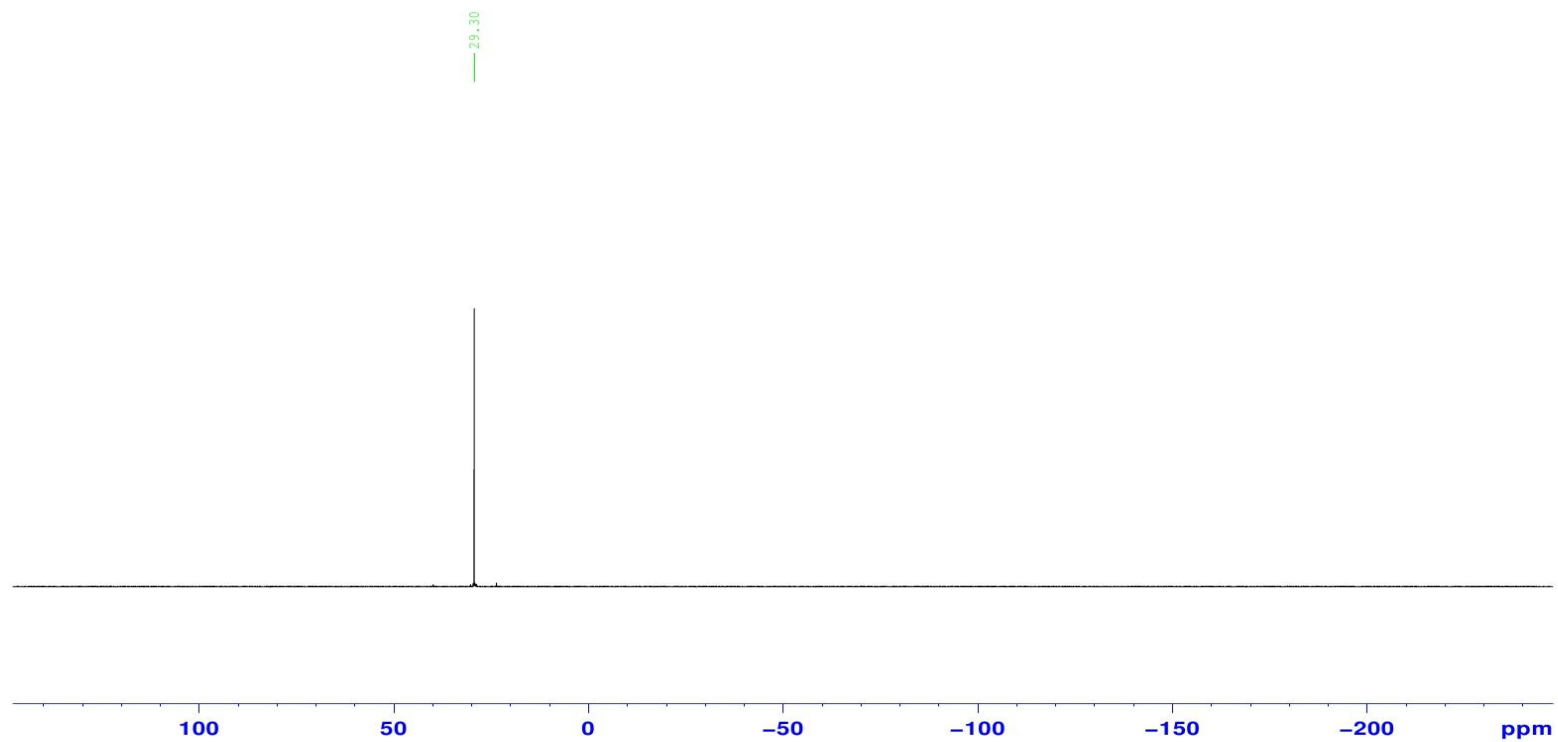



3t-H

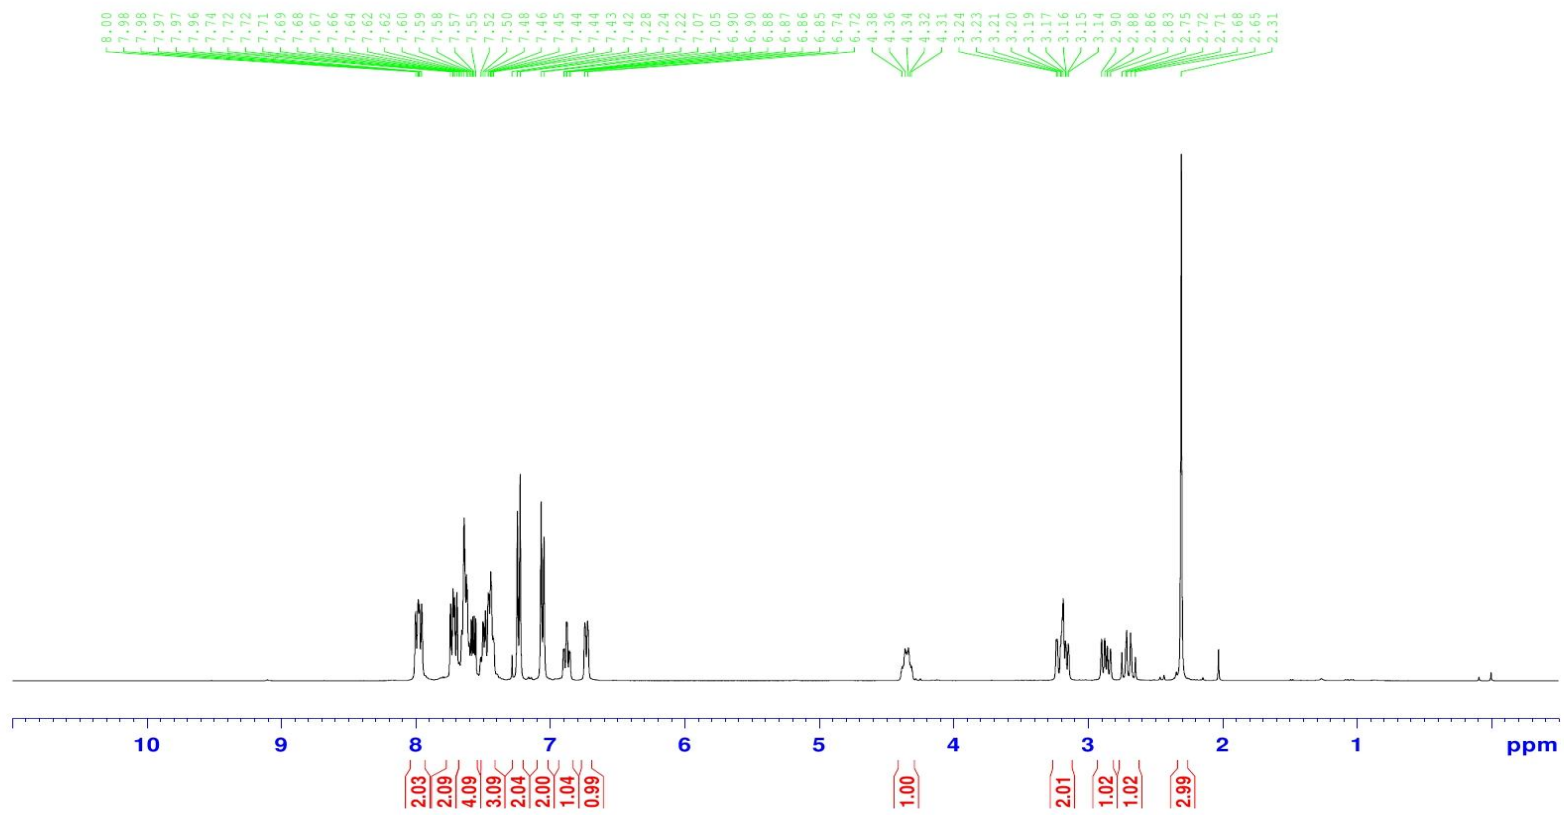

3t-C

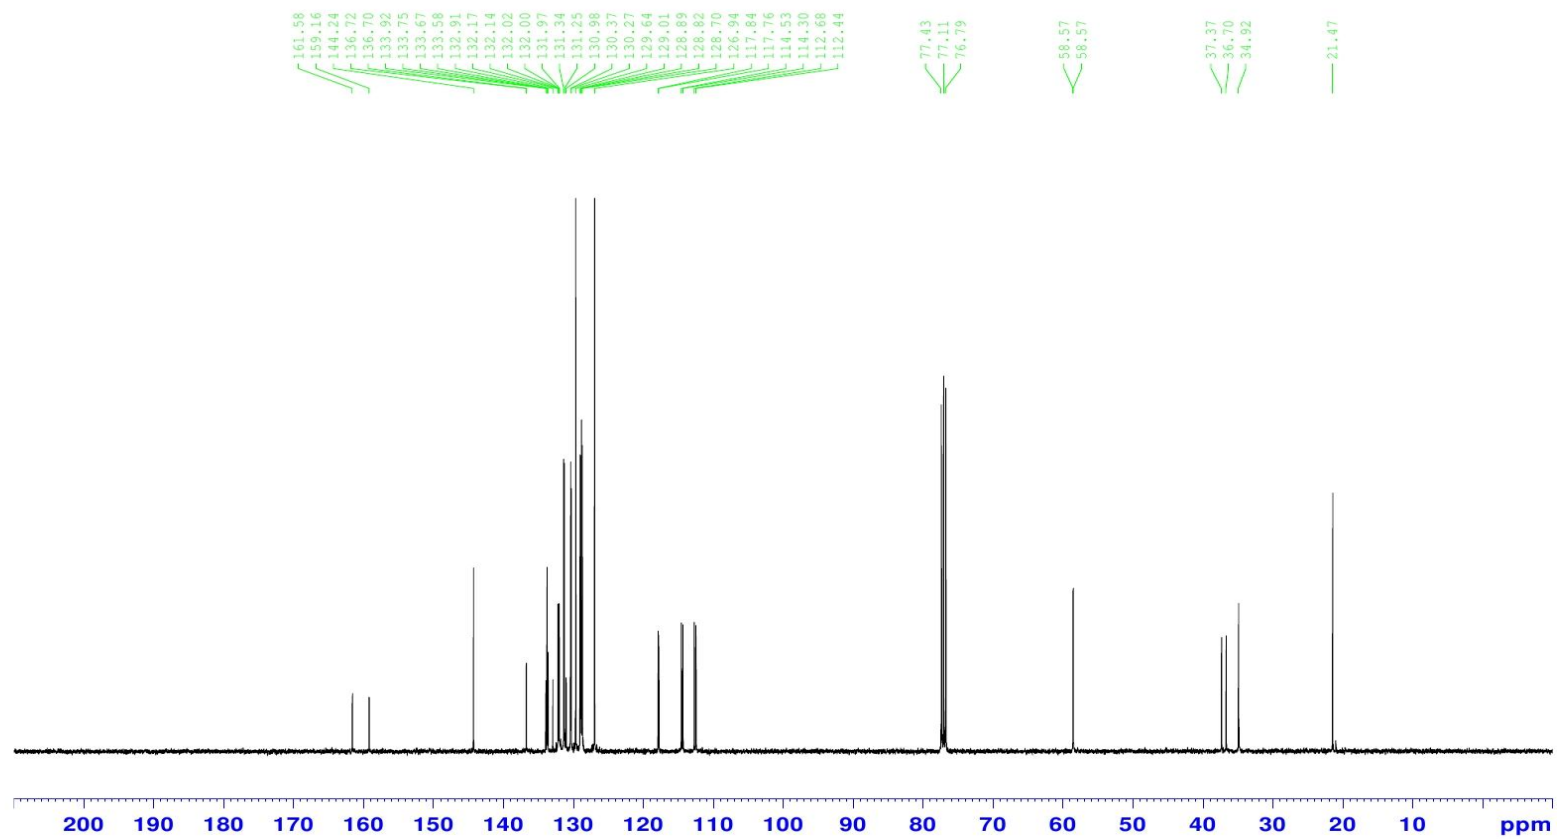

3t-F

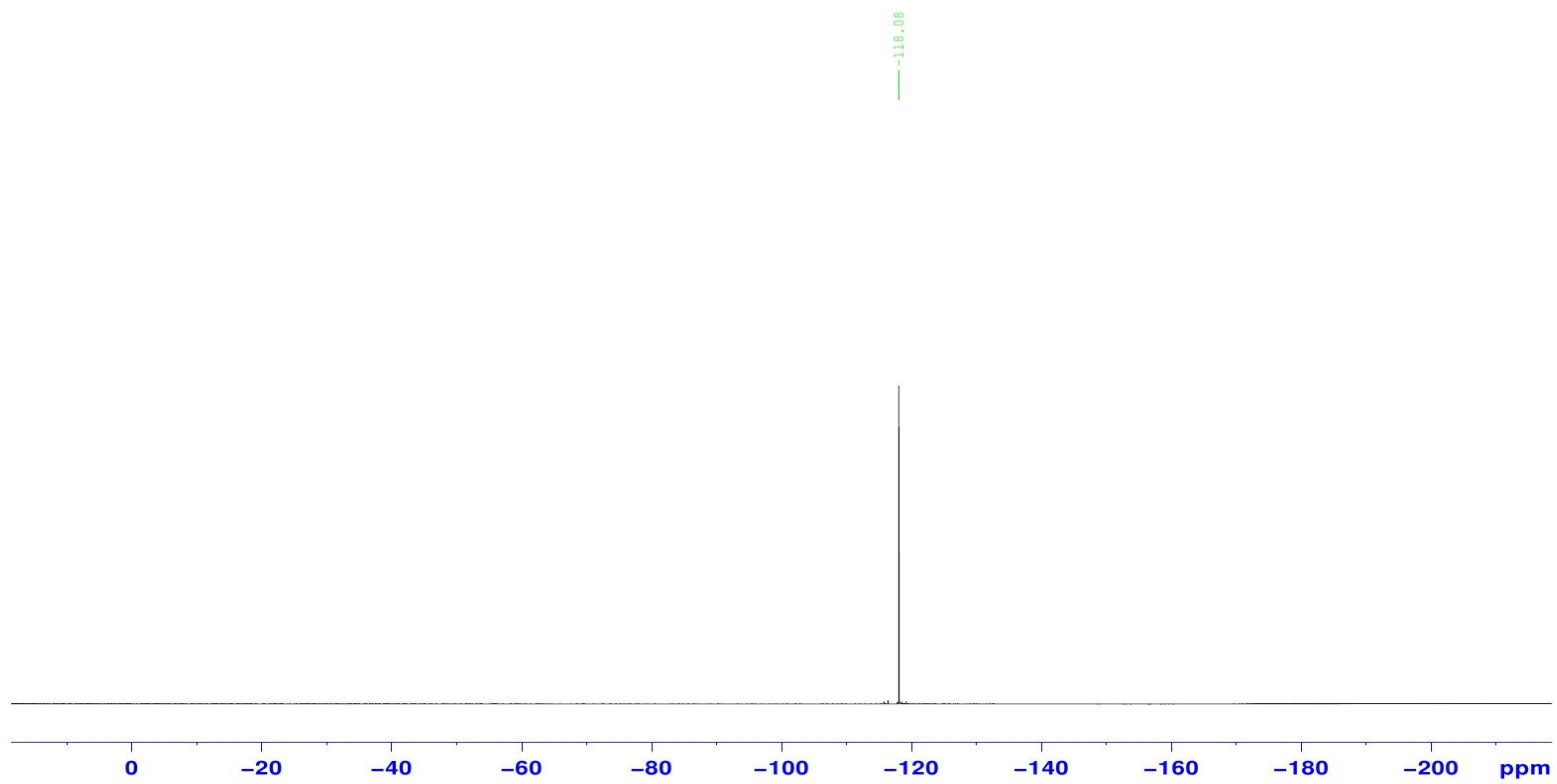

SI-75

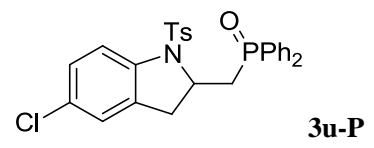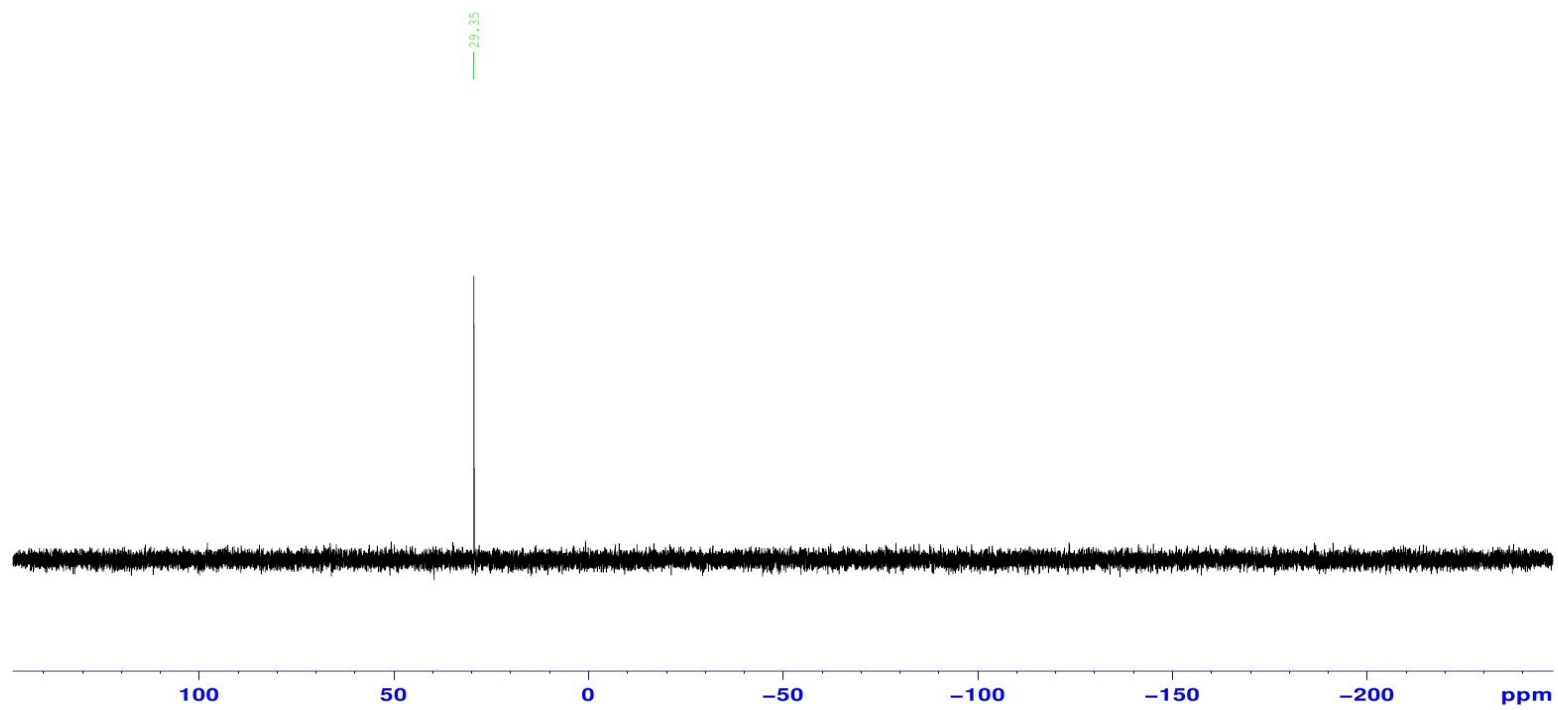

3u-H

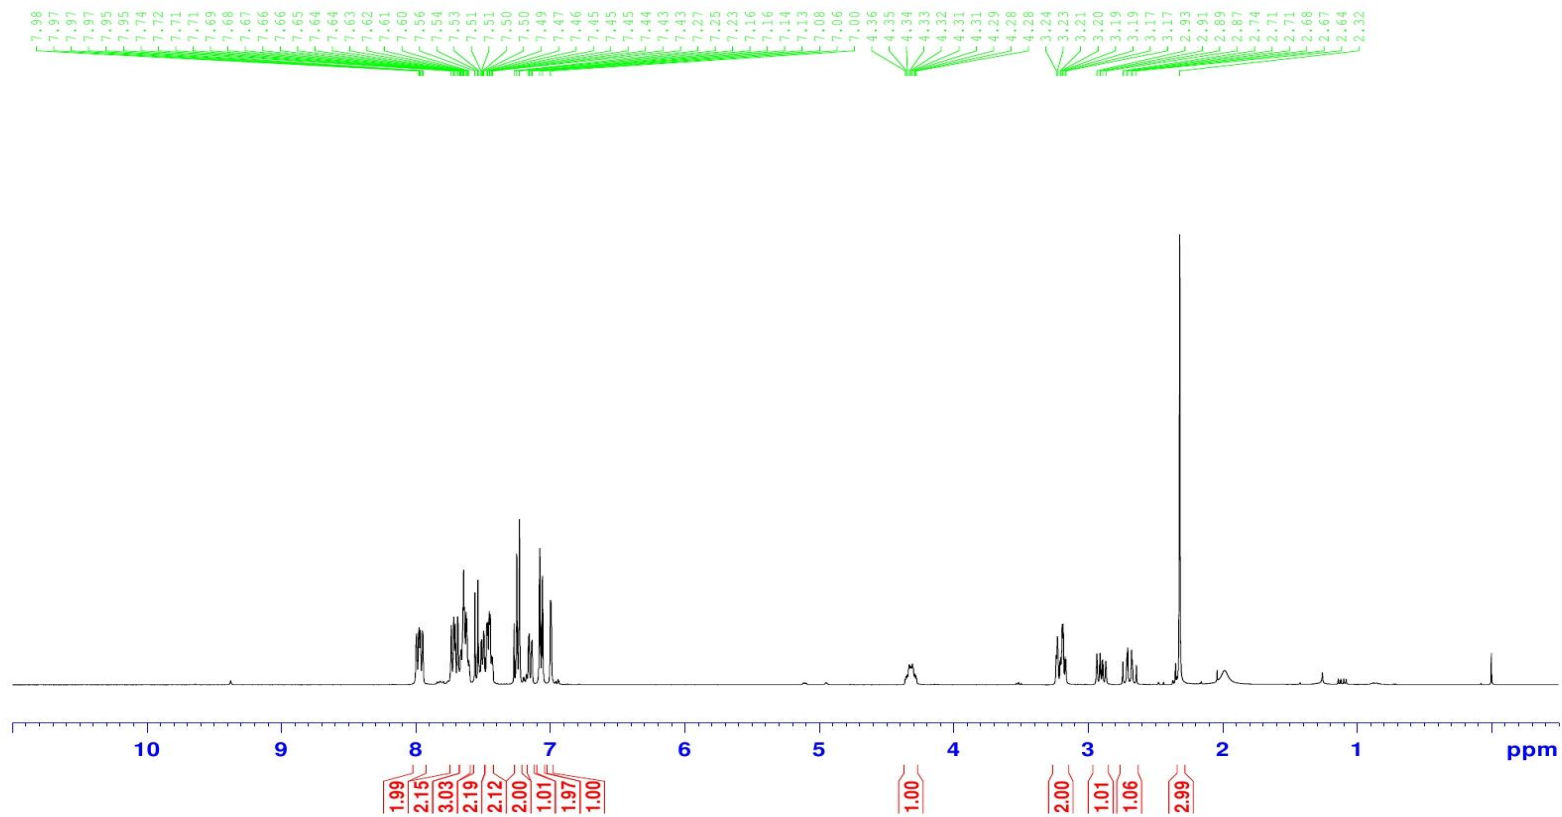

3u-C

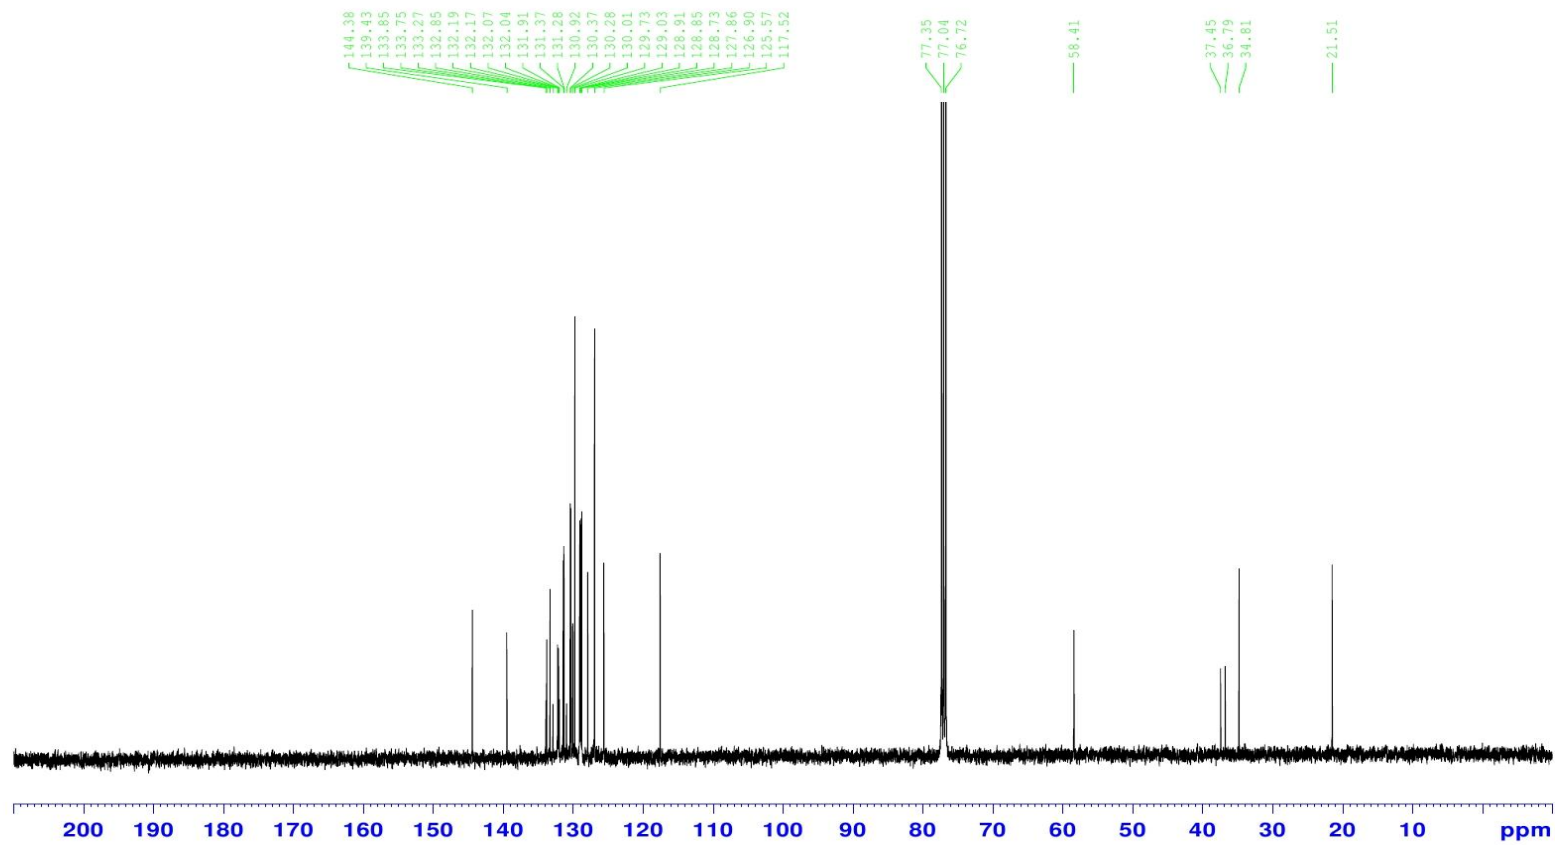

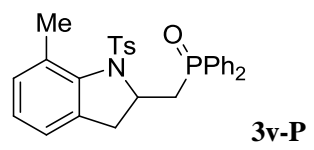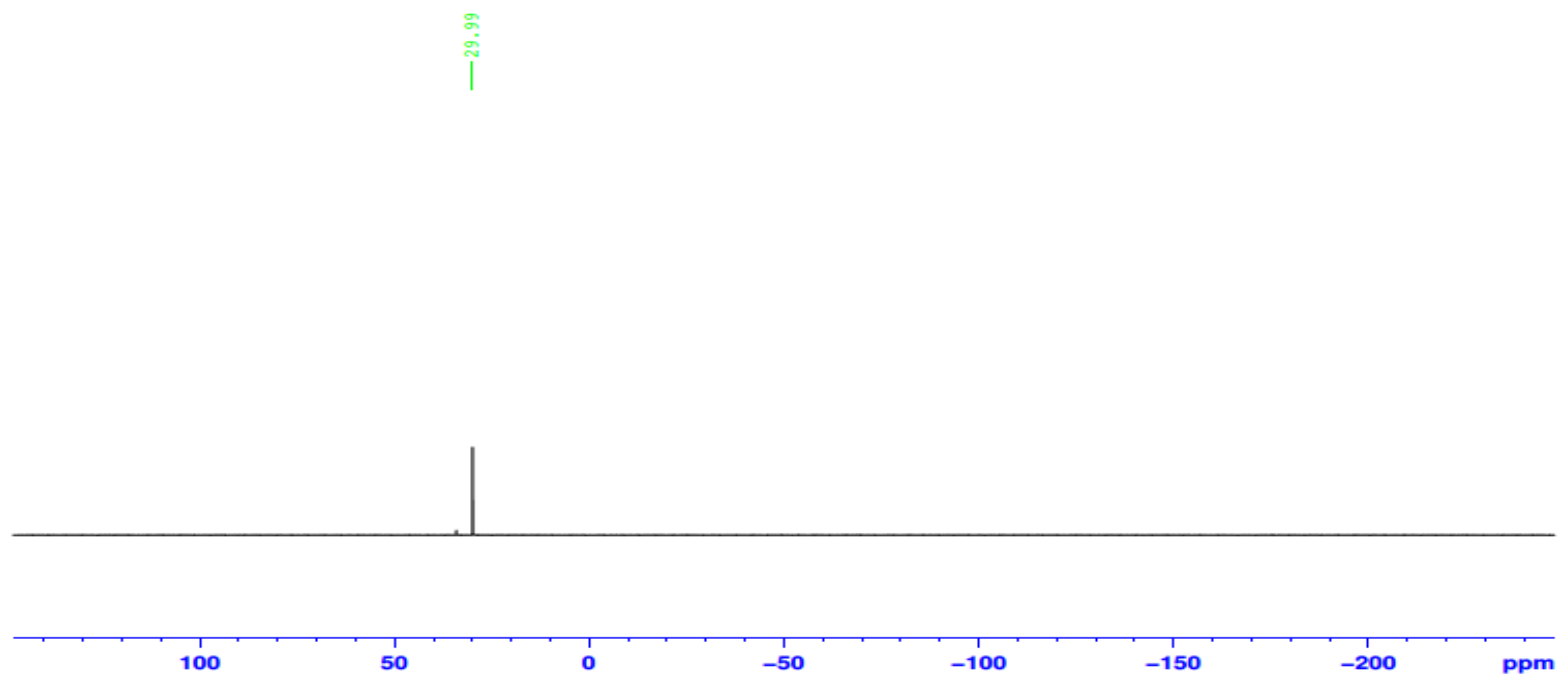

3v-H

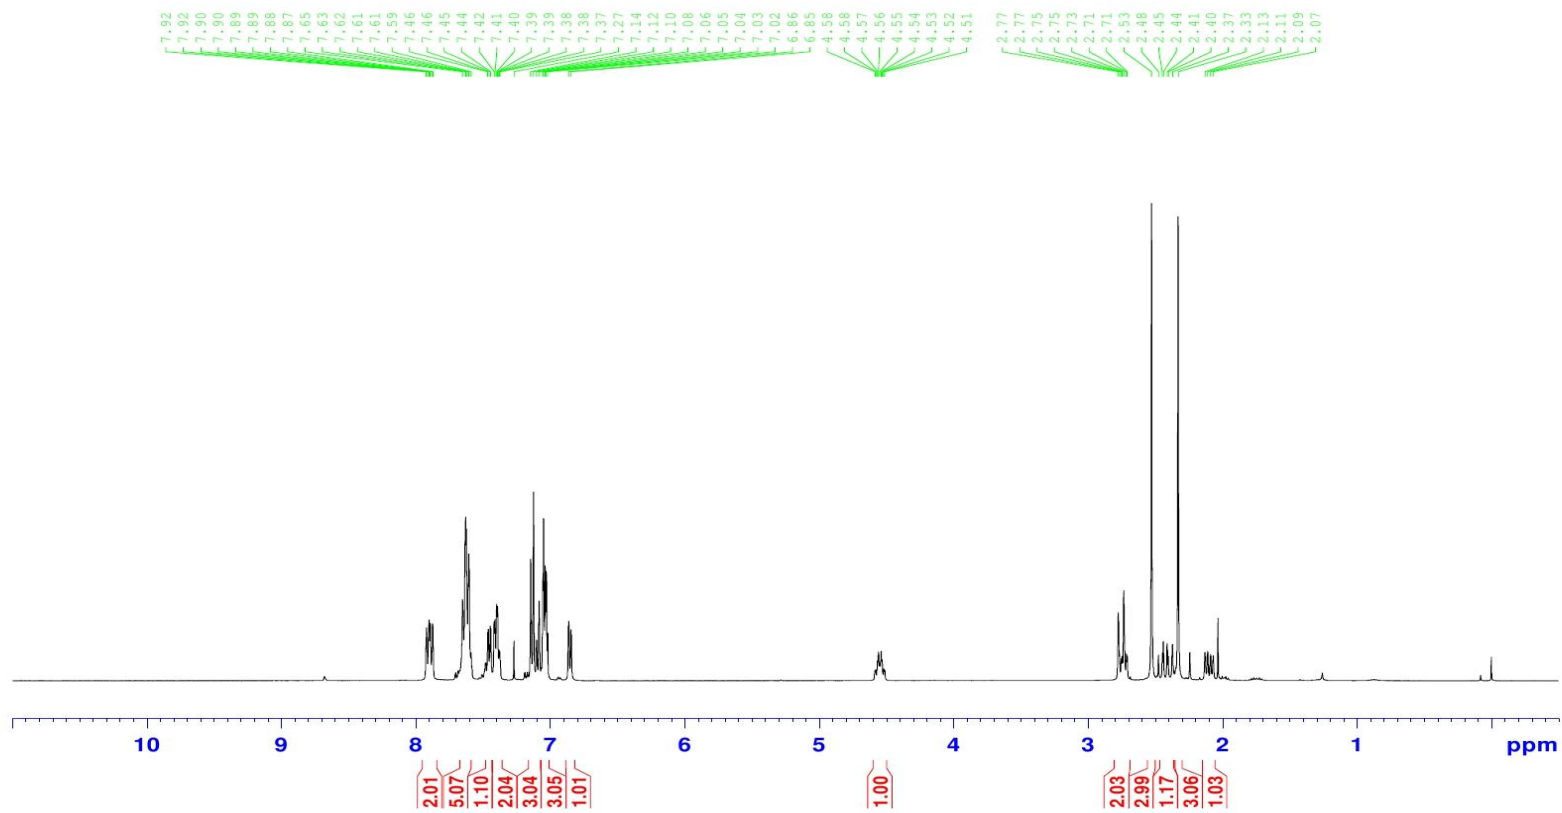



3v-C

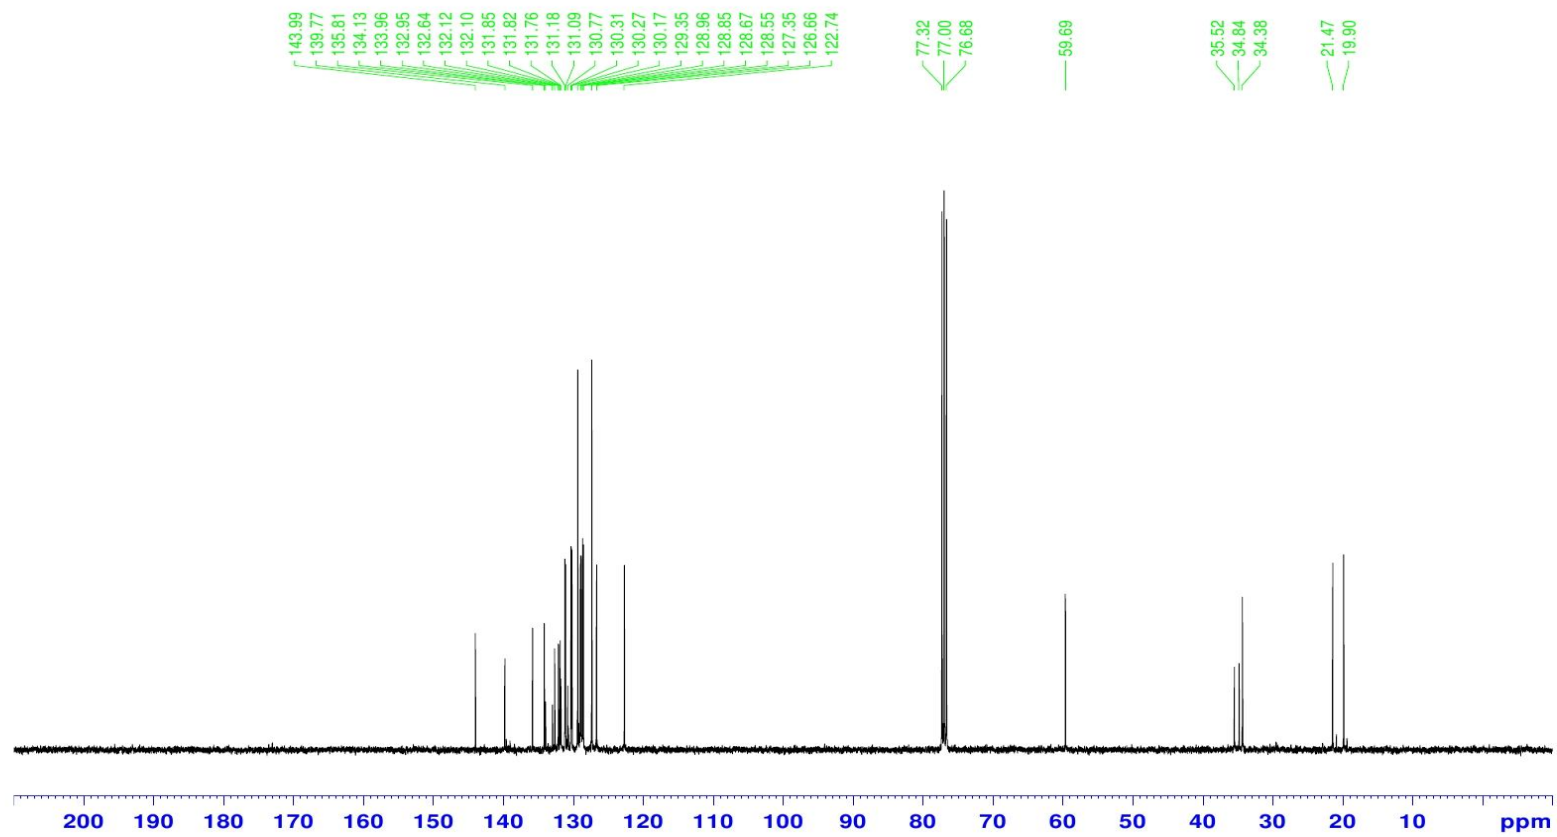

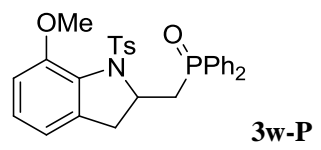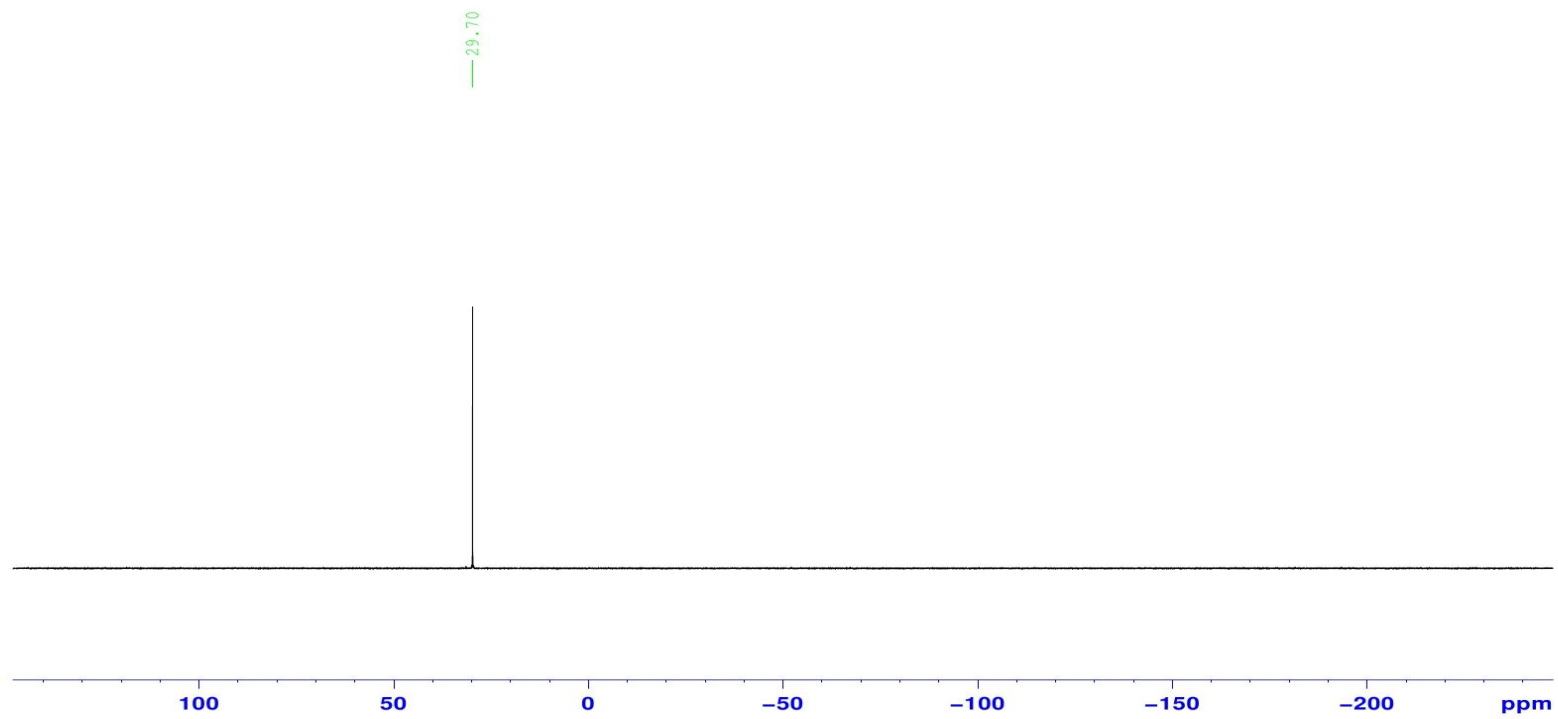

3w-H

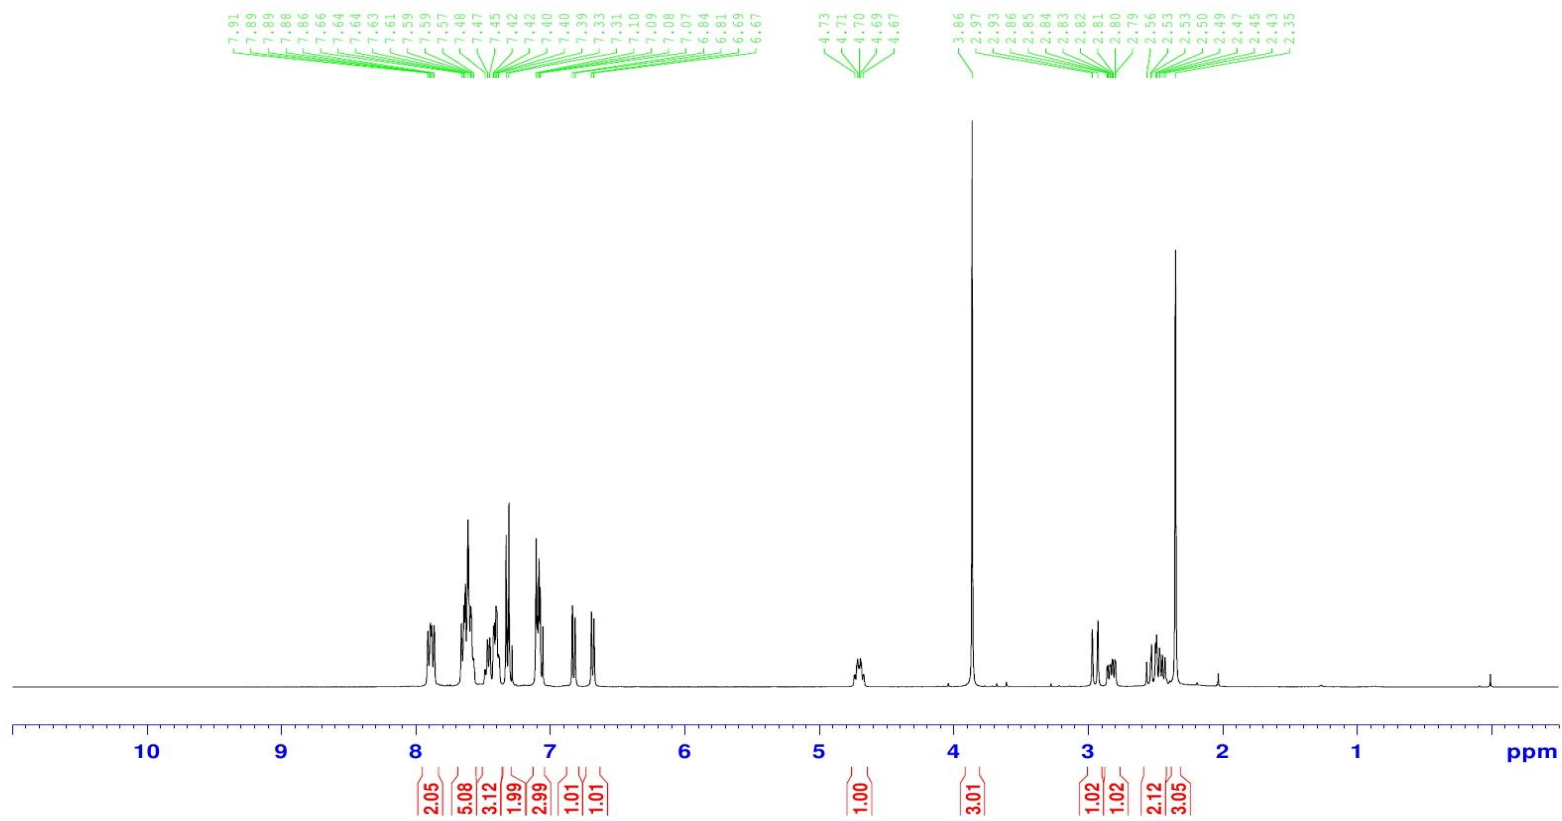

3w-C

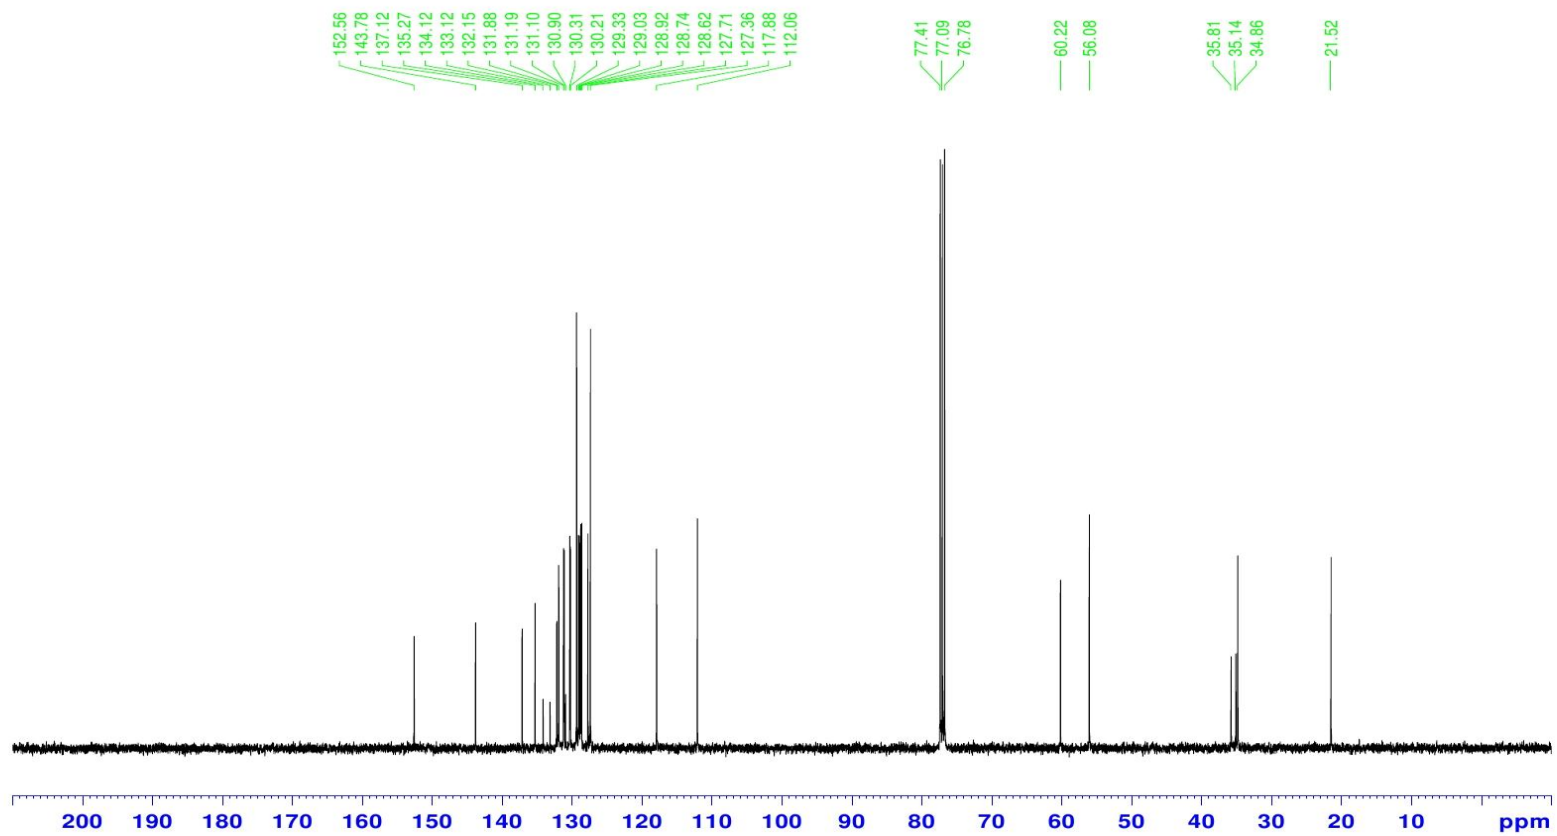

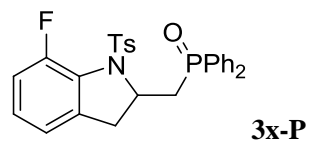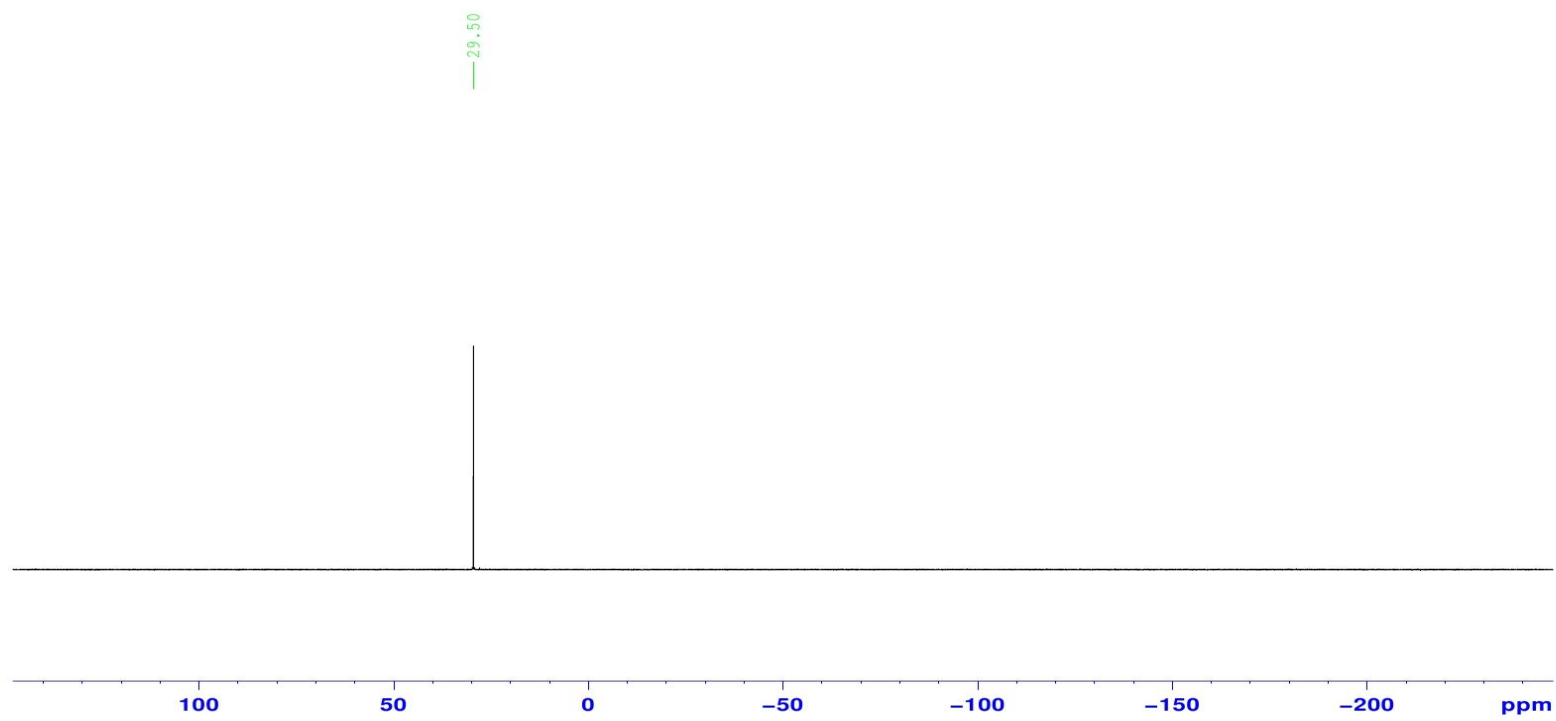

3x-P

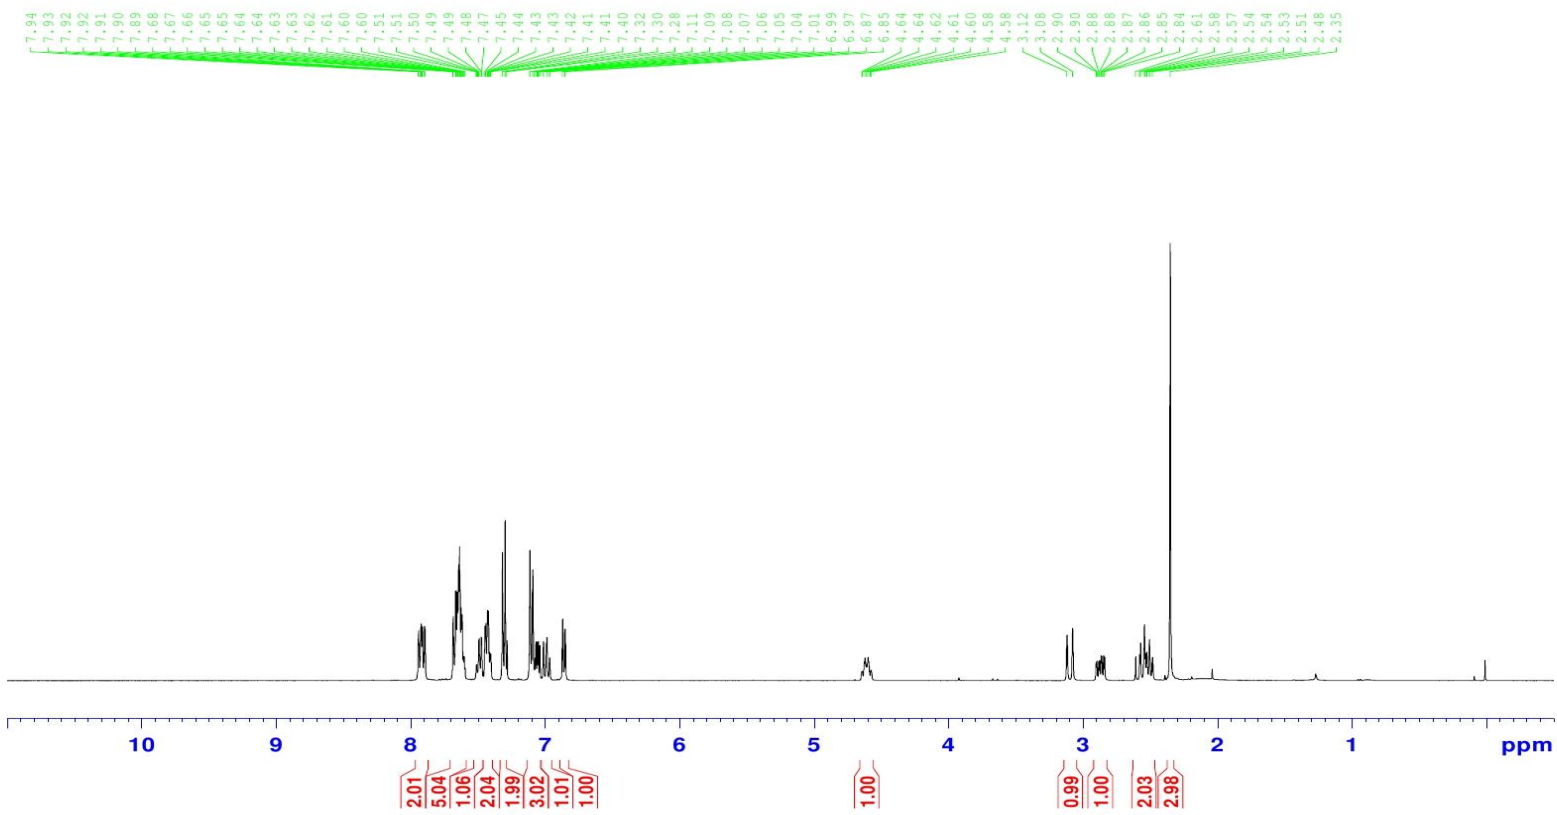

3x-C

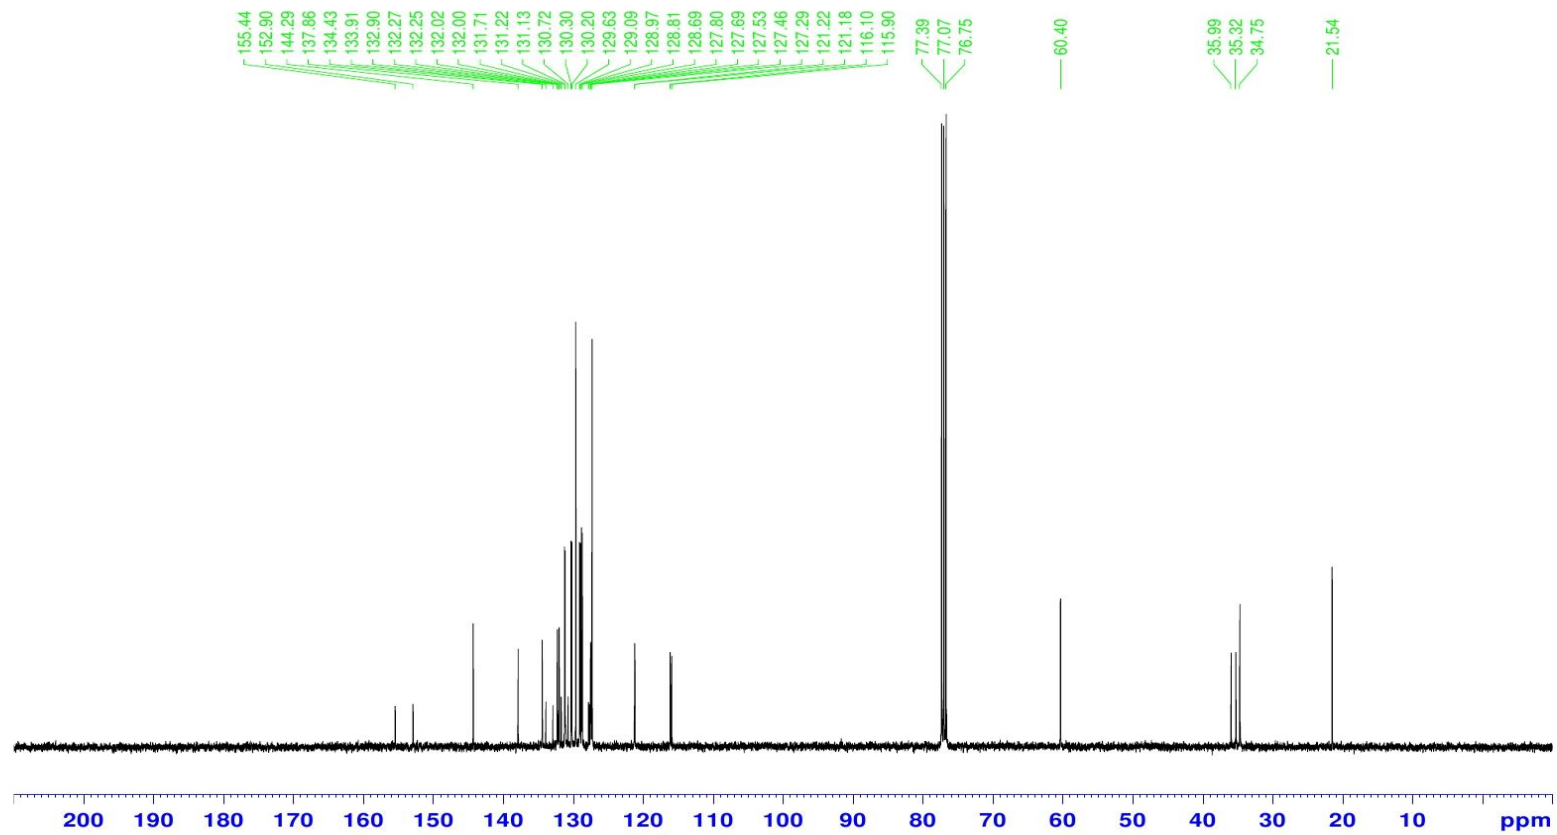

3x-F

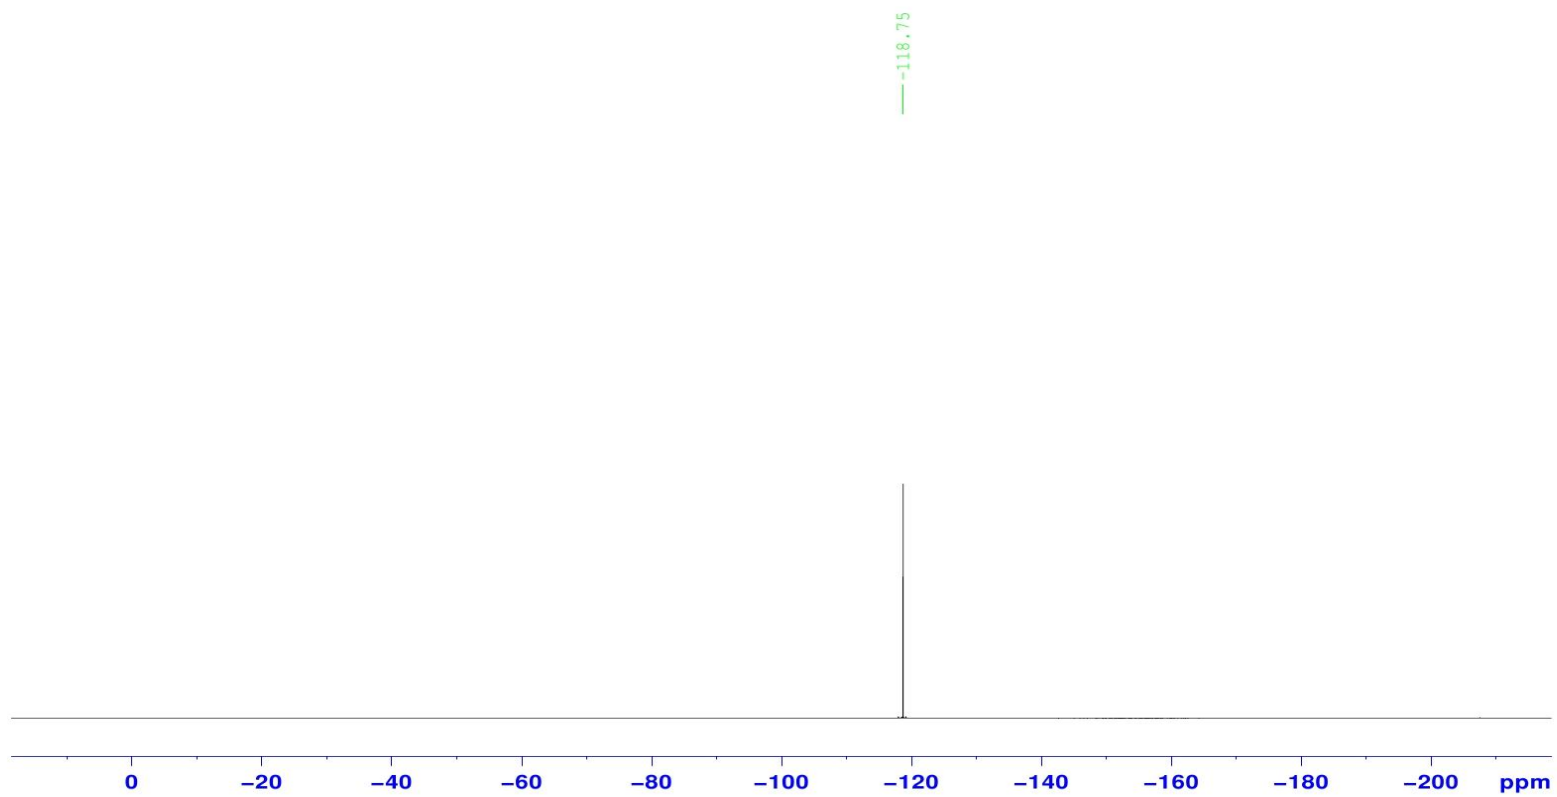



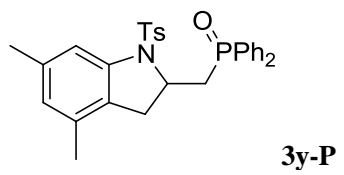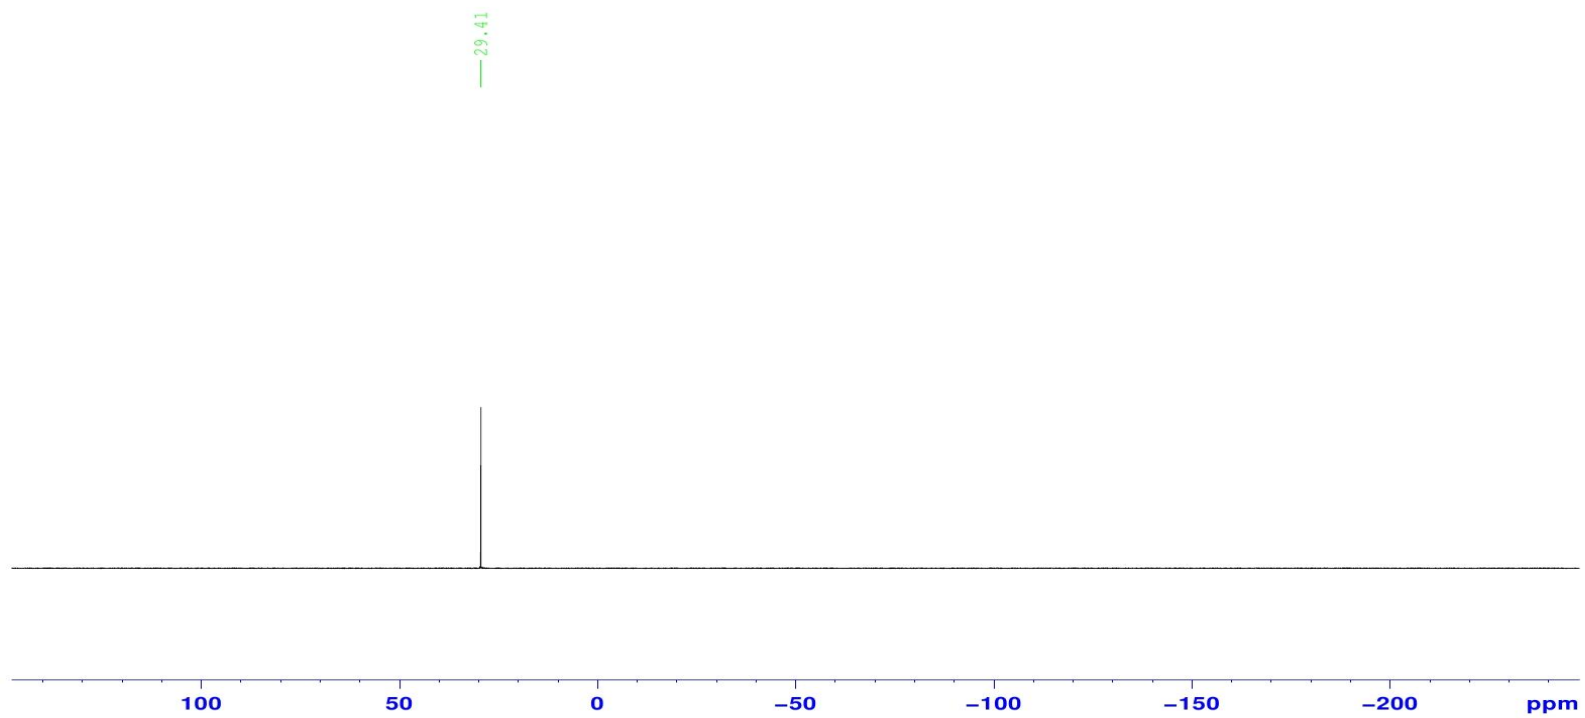

3y-H

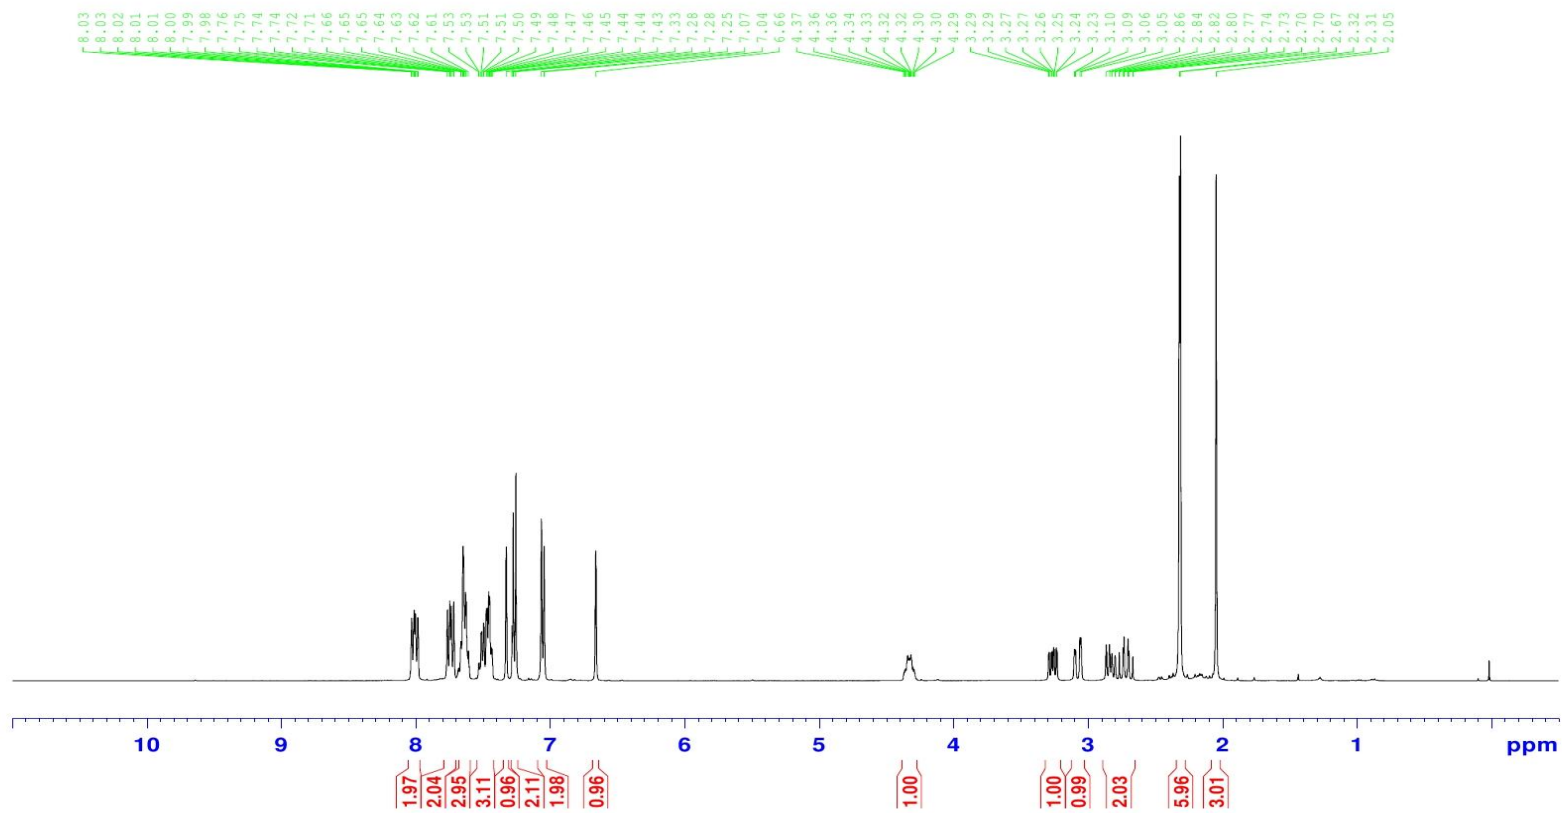

3y-C

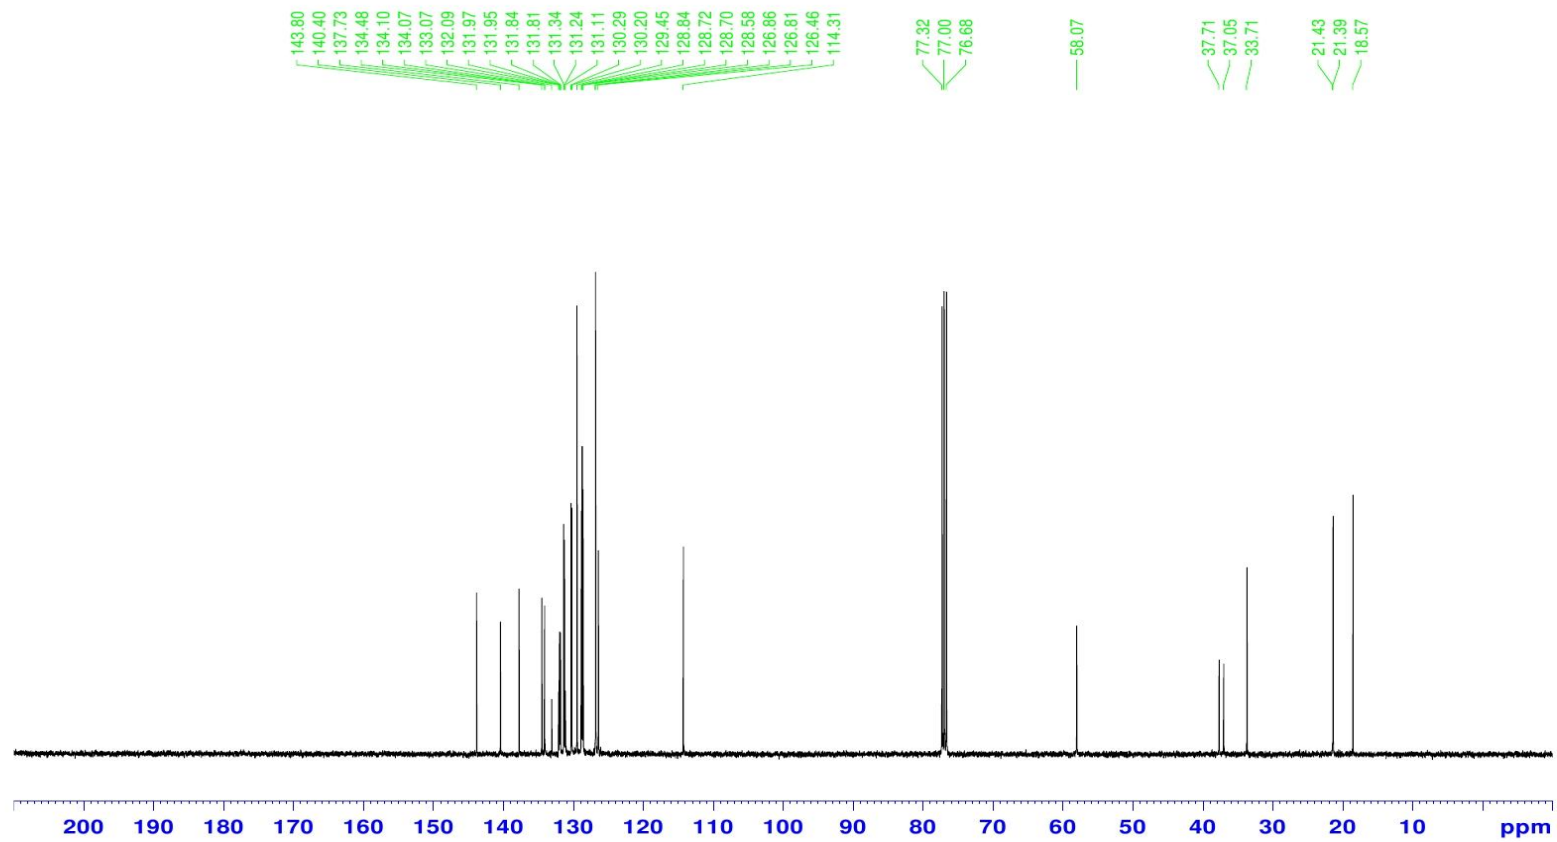

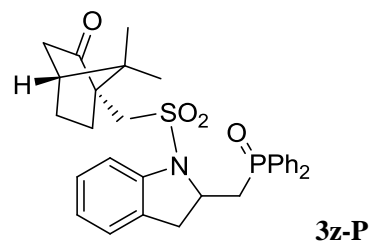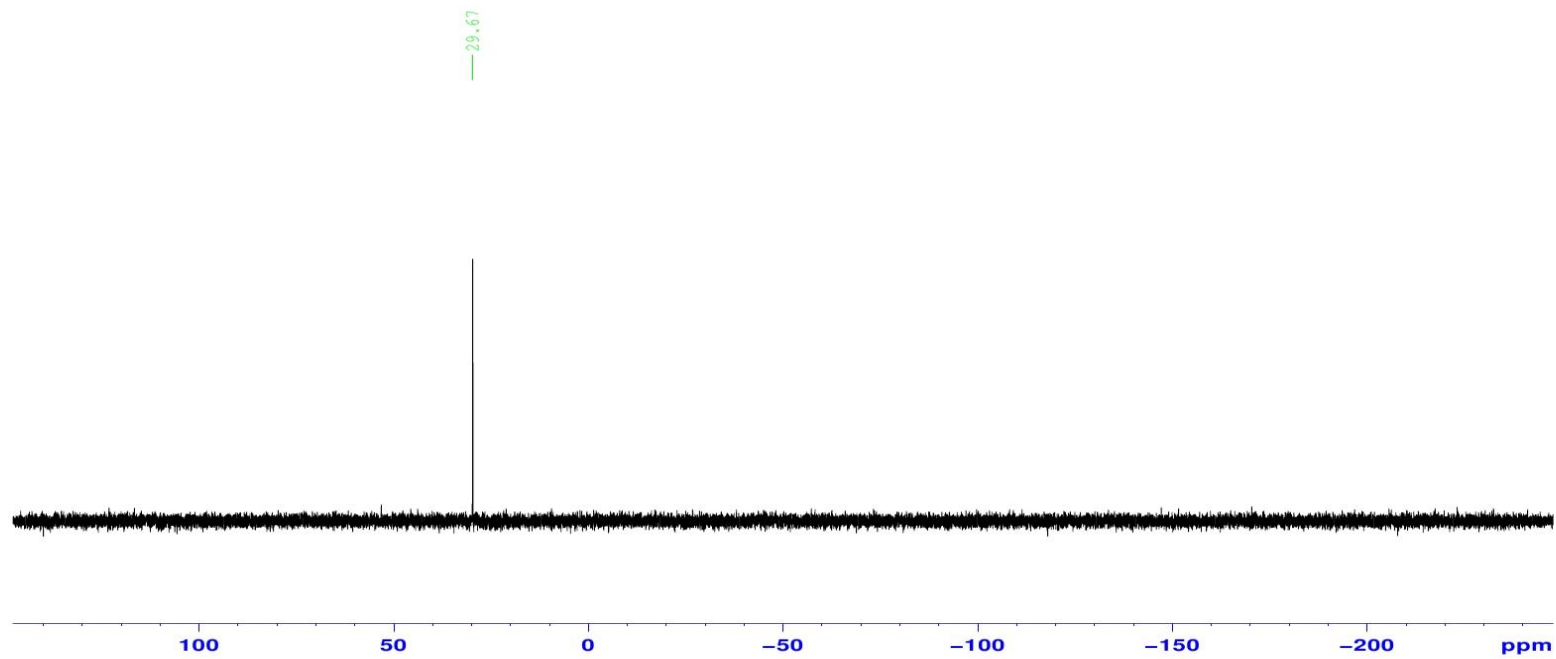

3z-H

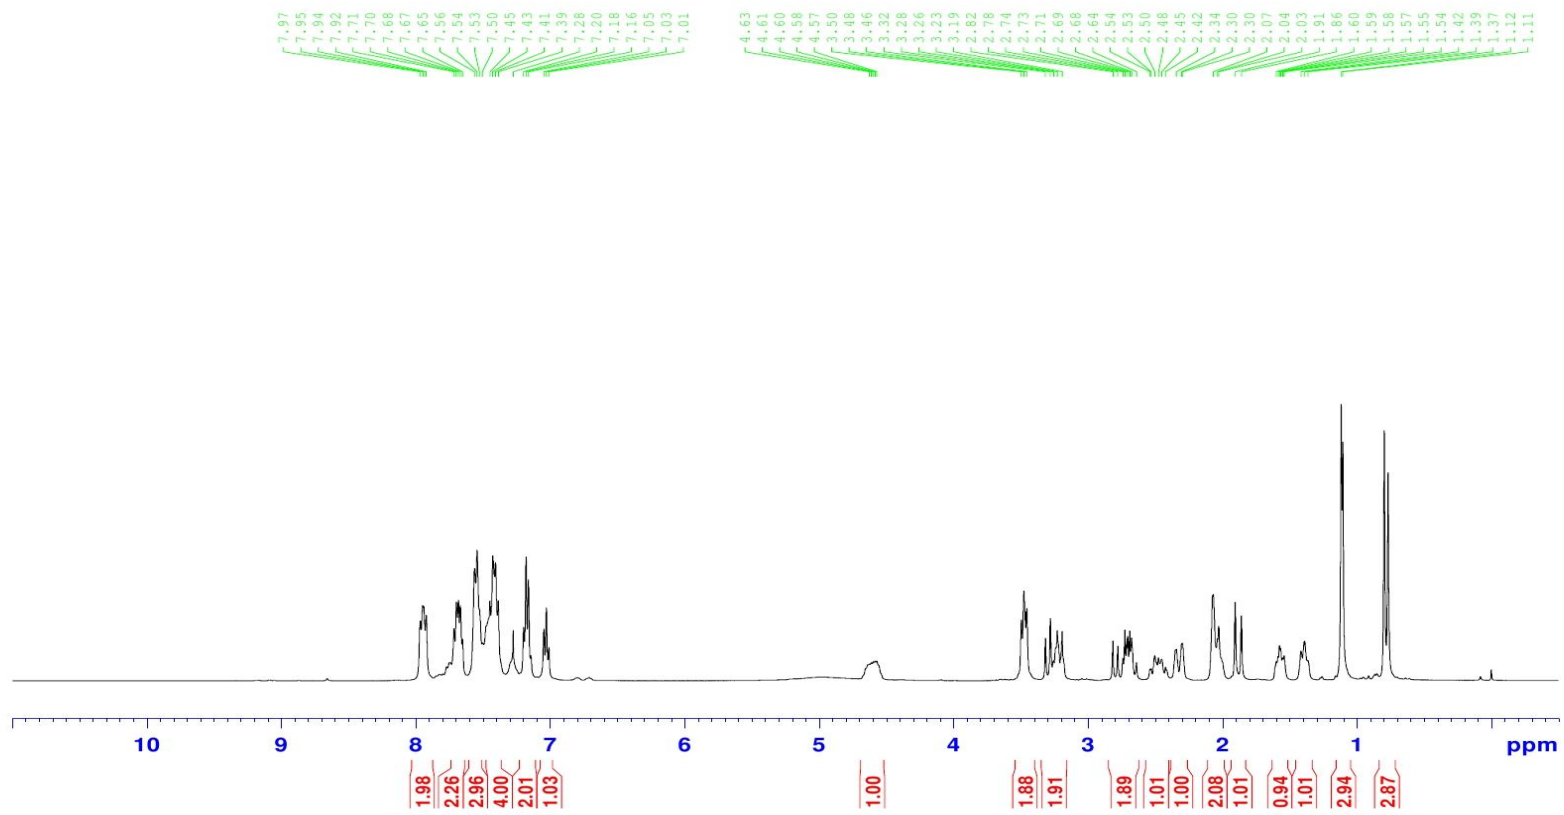

3z-C

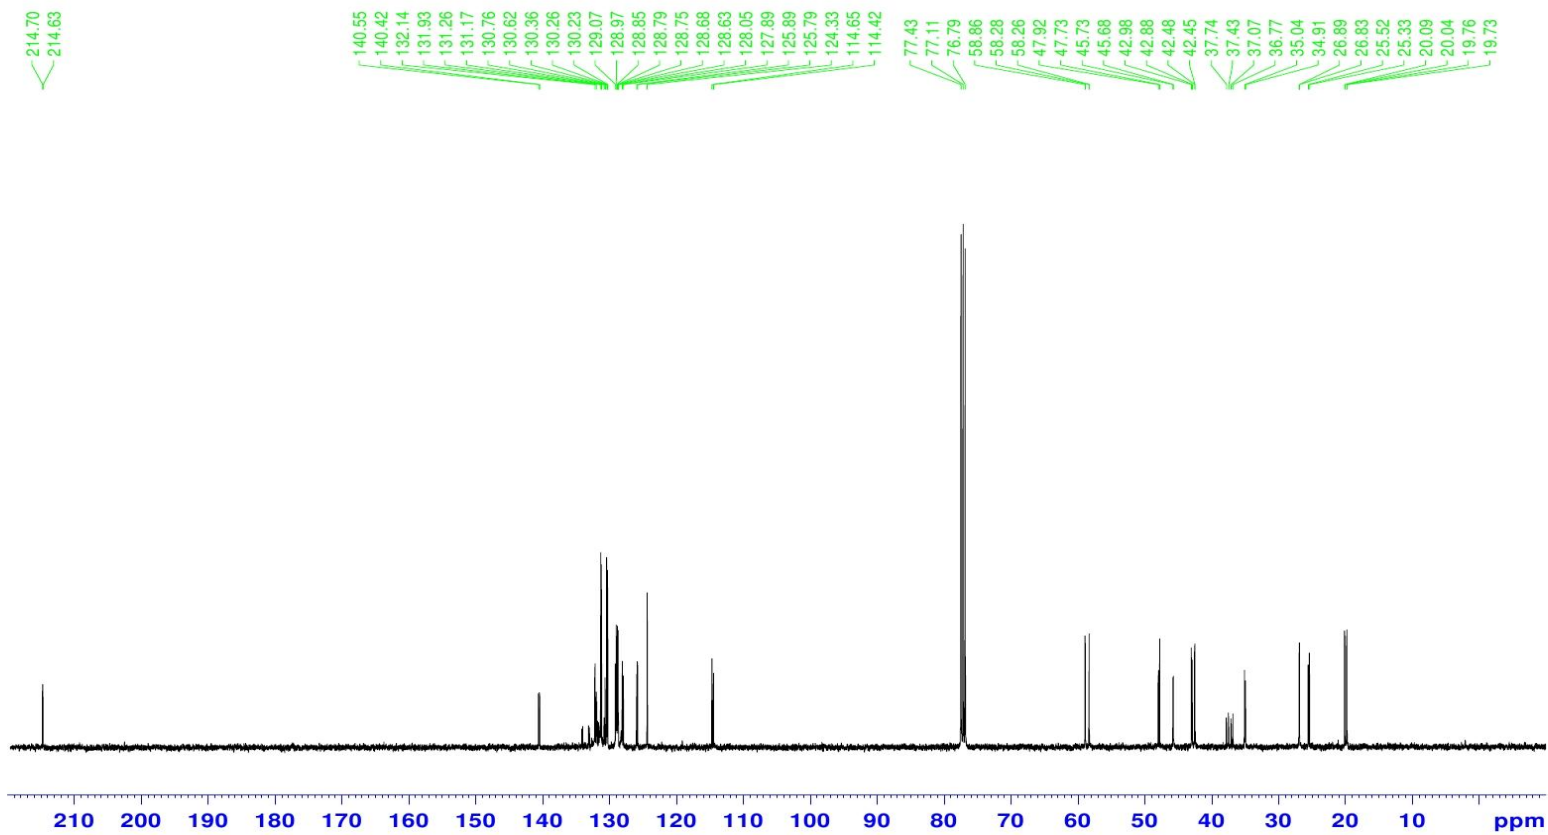

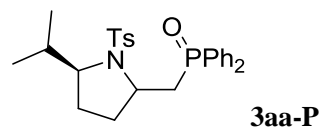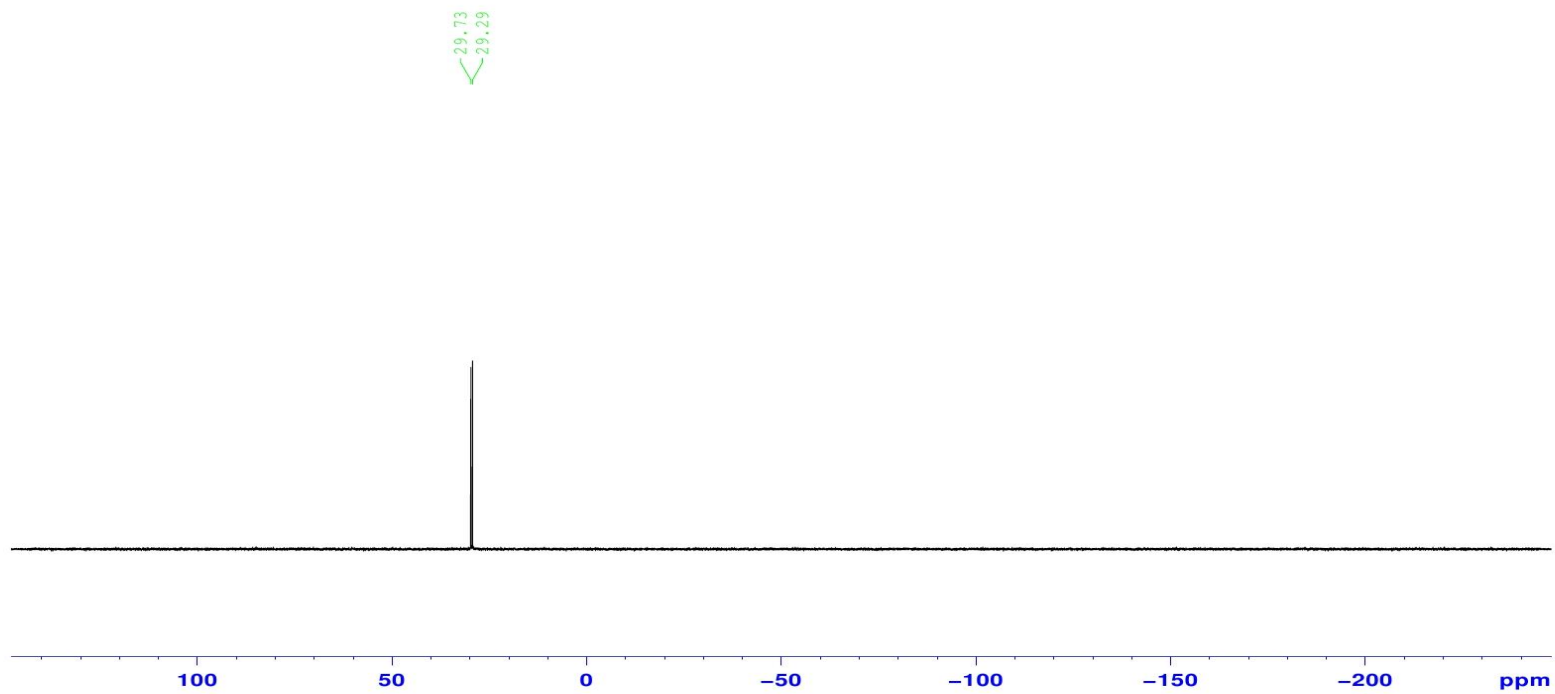

3aa-H

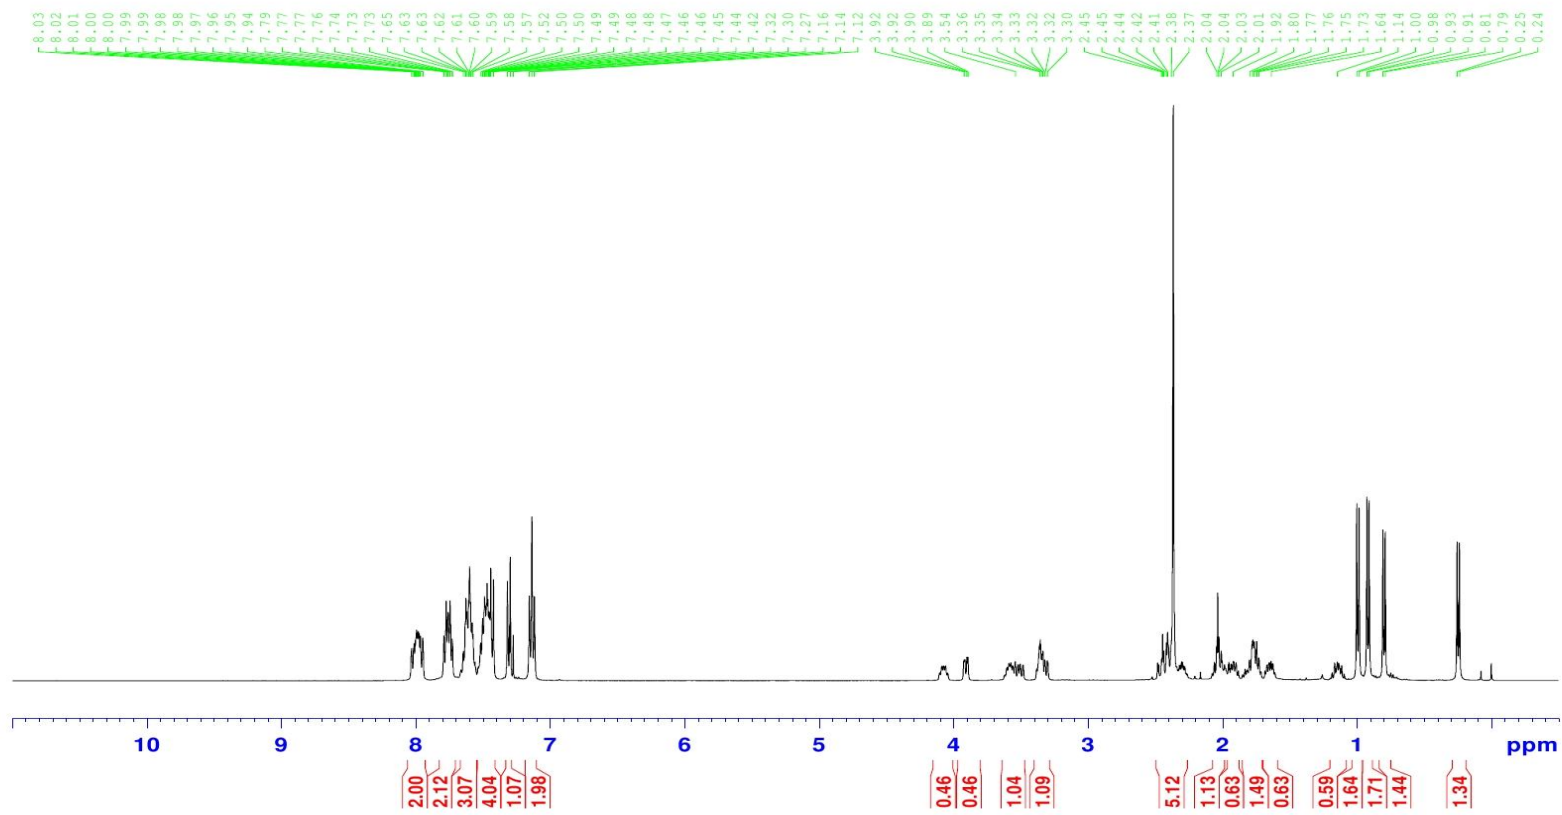



3aa-C

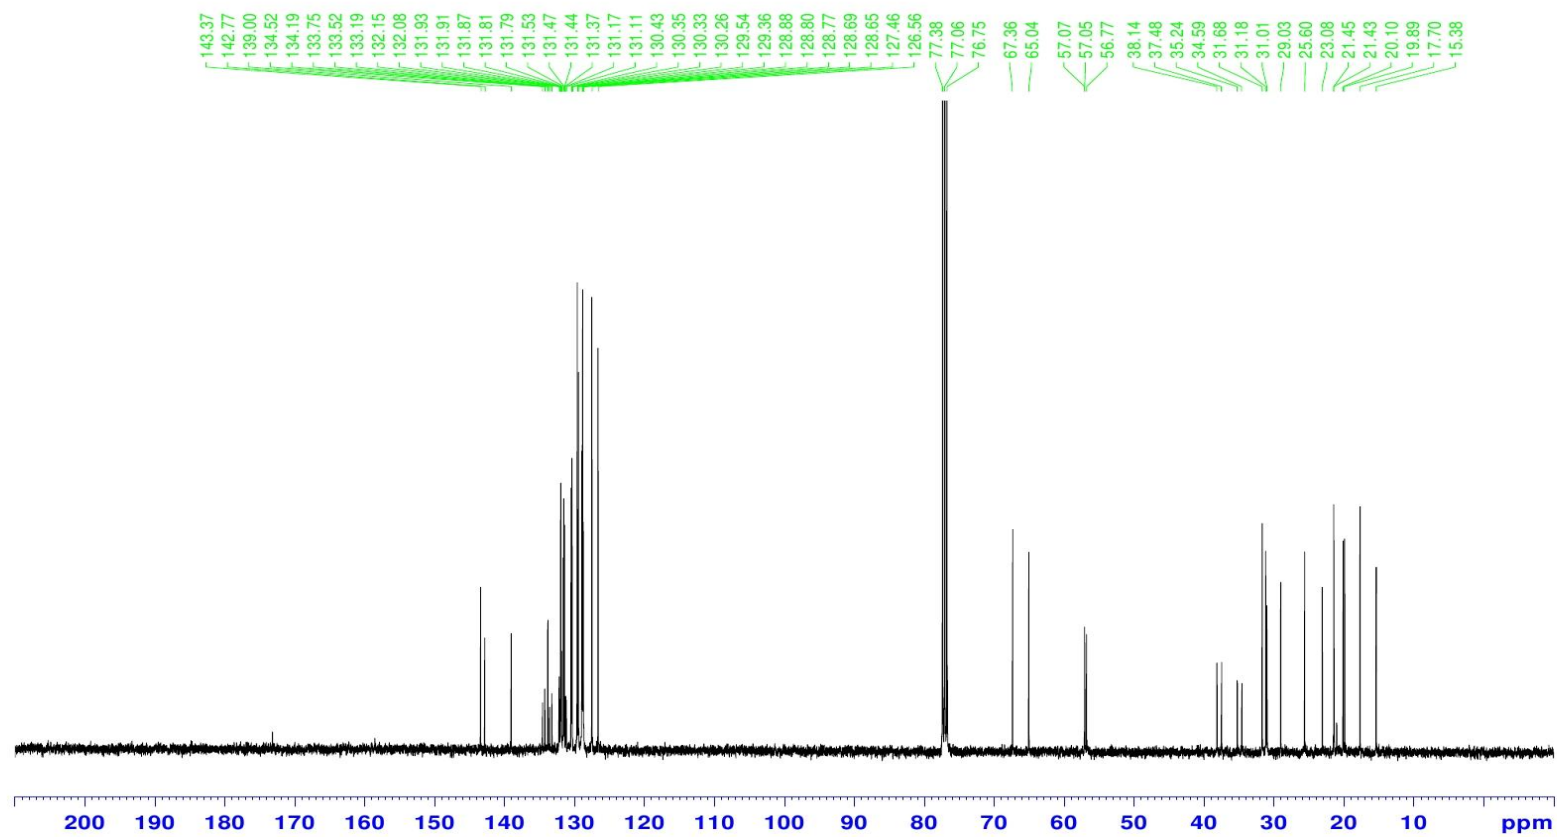

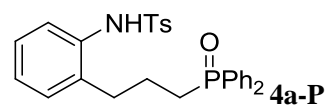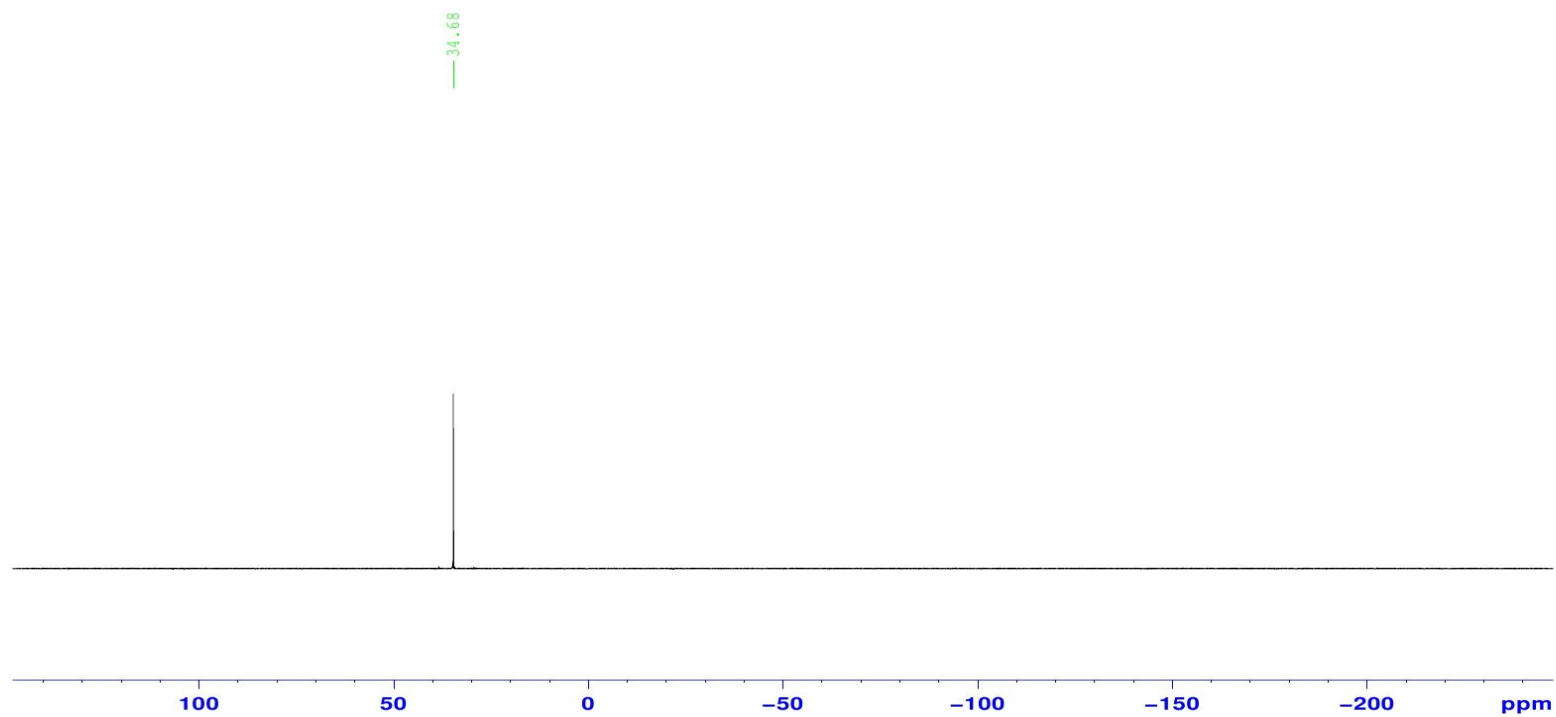

4a-H

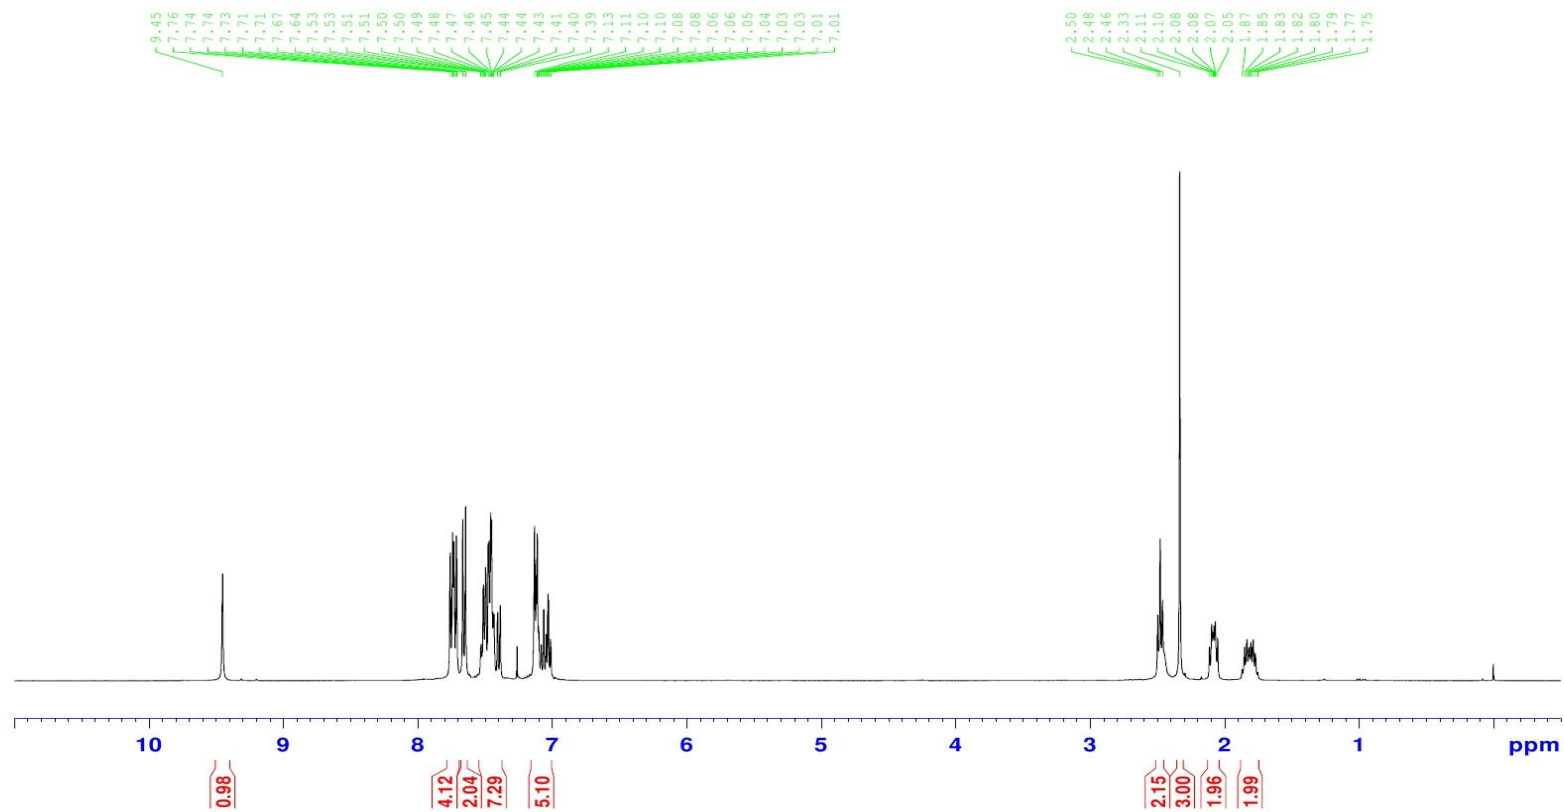

4a-C

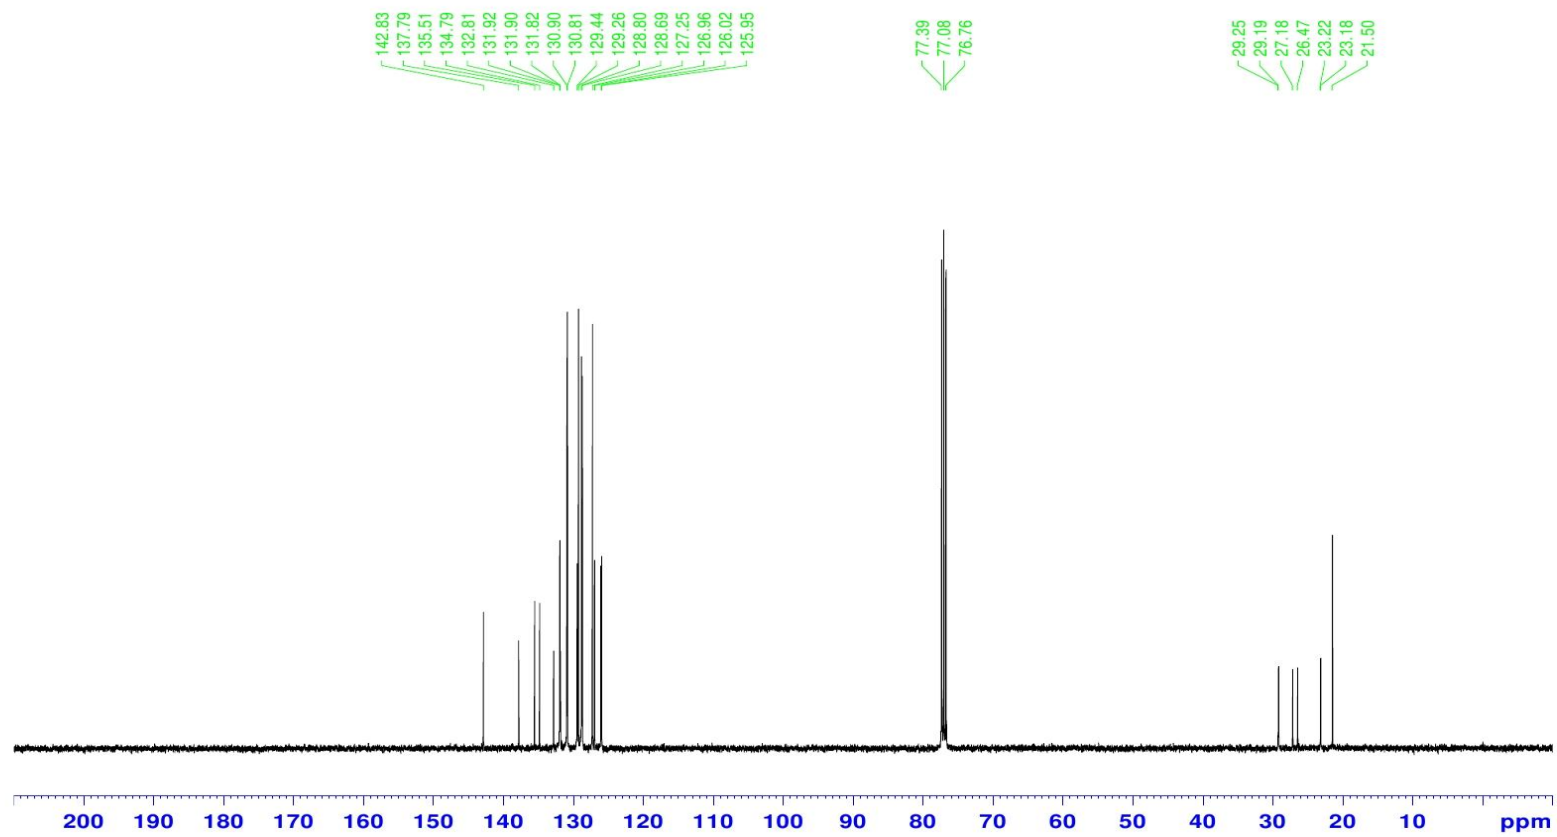

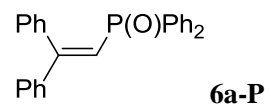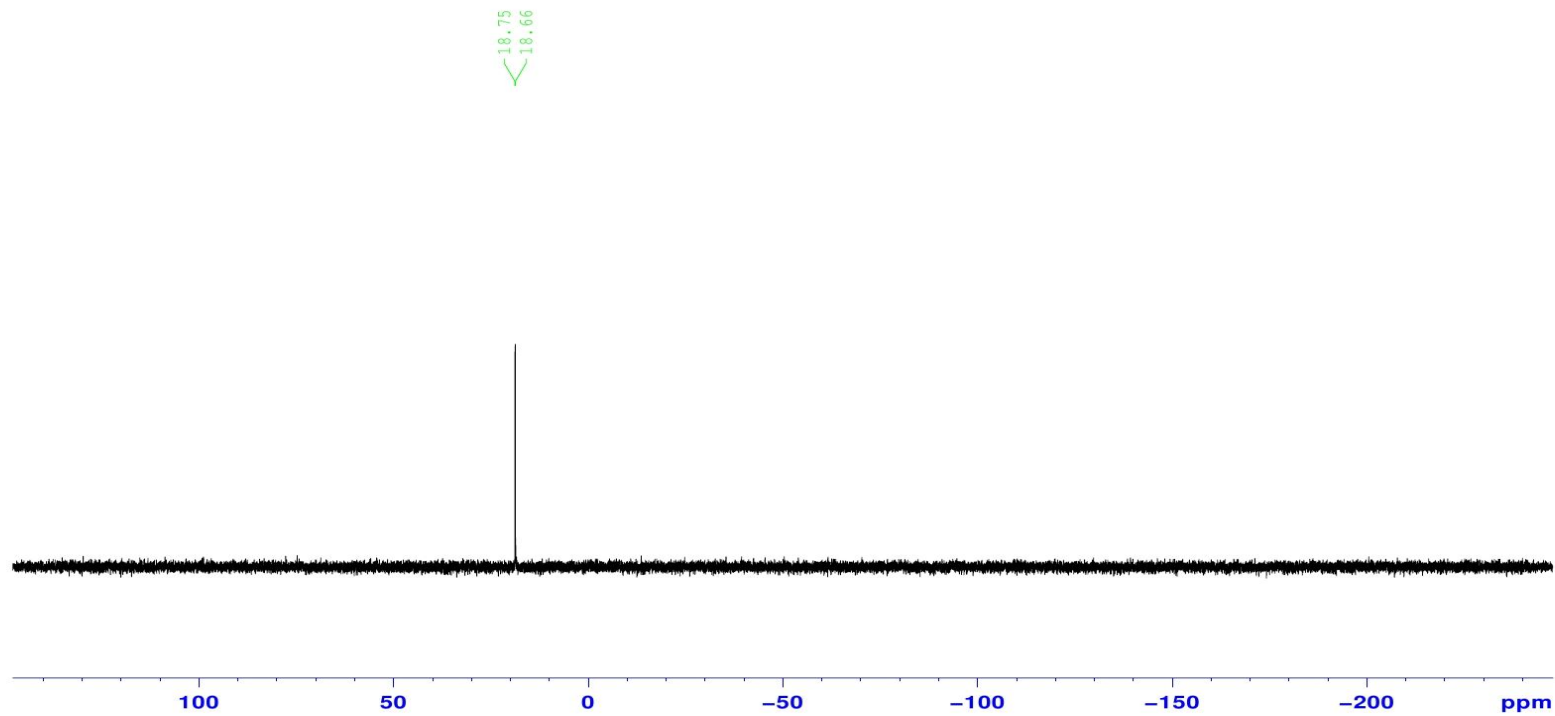

6a-H

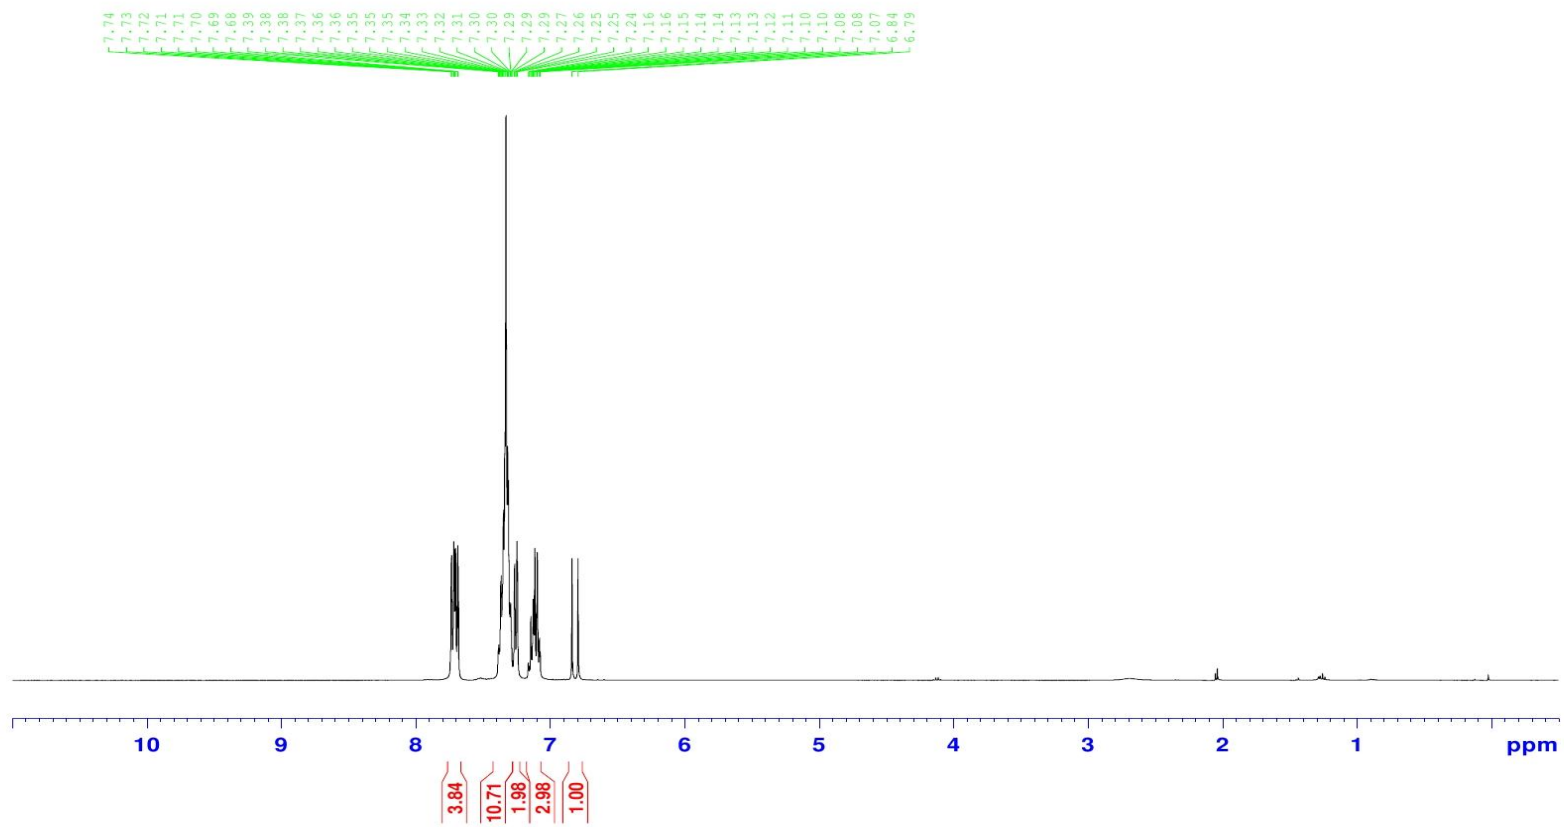

6a-C

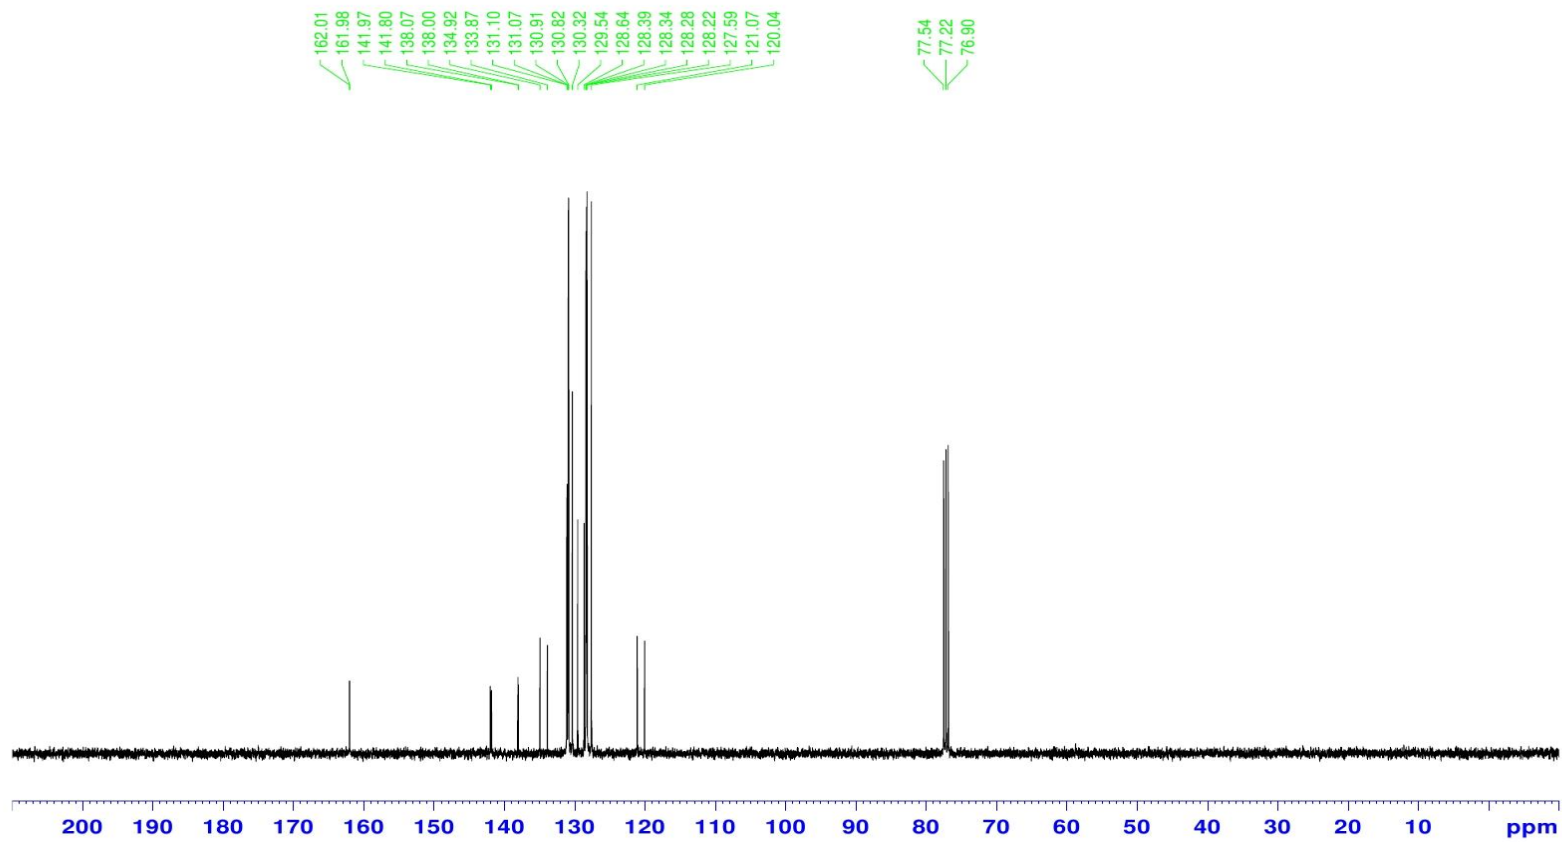

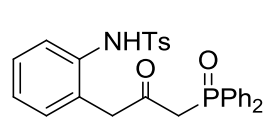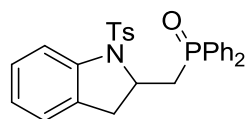

**8a:3a = 1:1-P**

29.49  
28.55

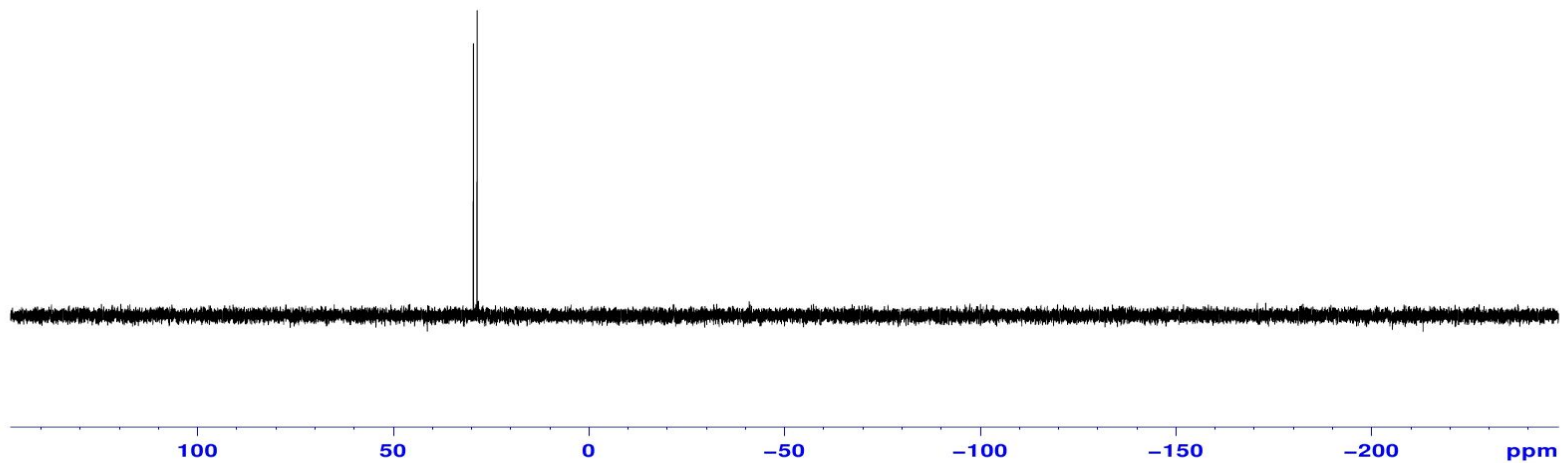



8a:3a = 1:1-H

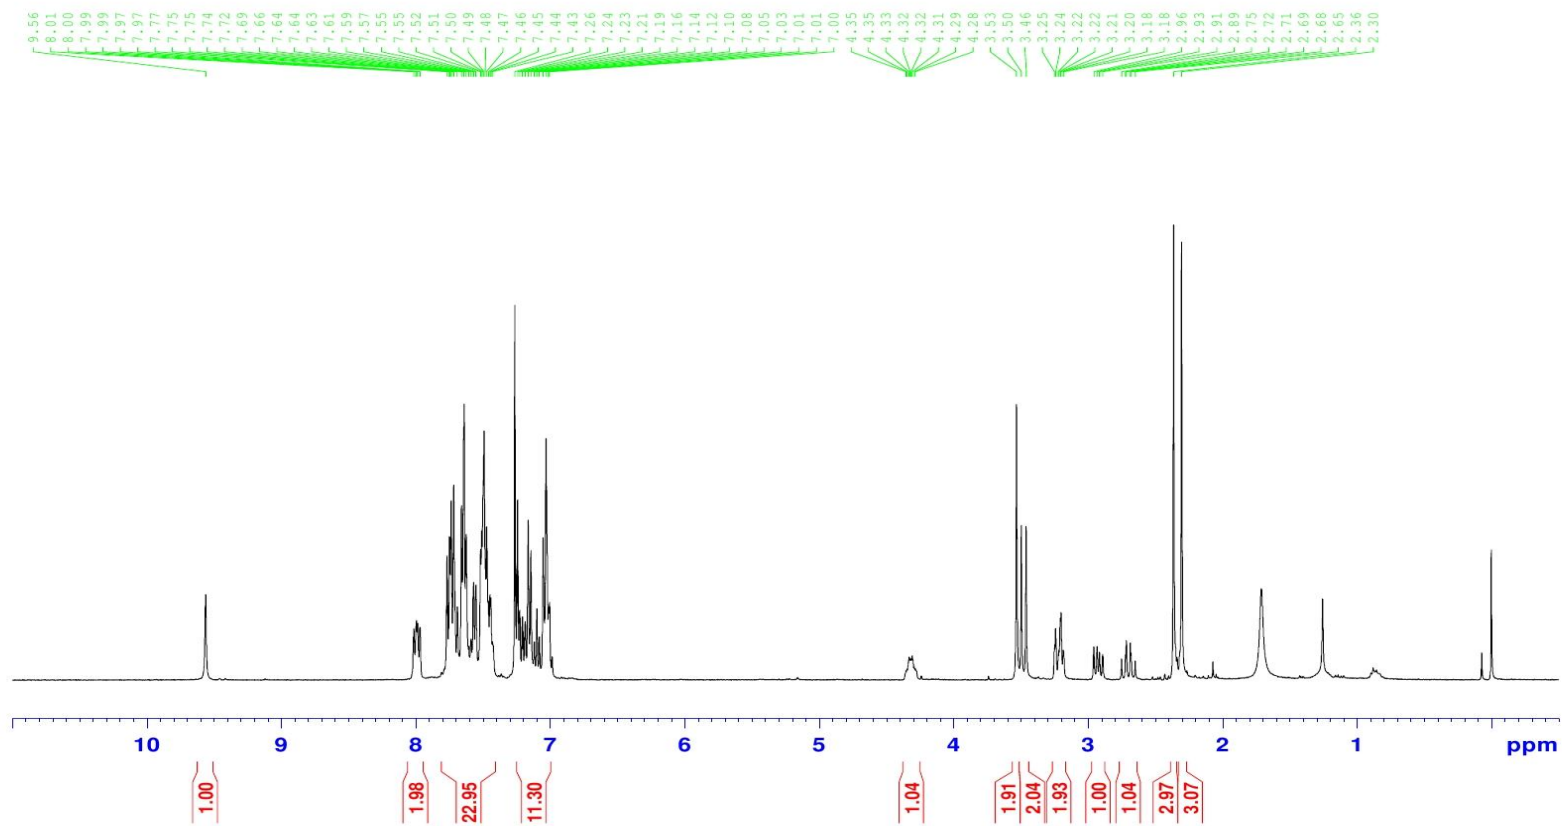

Supplement: c4cc10267c1.pdf [file c4cc10267c1.pdf]
